# Supplementary material
Source: PubMed Central journal article supplement (PMC4121788)
Supplement: 1402782111_pnas.1402782111.sapp.pdf [file 1402782111_pnas.1402782111.sapp.pdf]

## Supplemental Methods:

### *Sample Collection*

Duplicate surface samples were collected from the Amazon River plume aboard the R/V Knorr in June 2010 (4 52.71°N, 51 21.59°W) during a period of high river discharge. The collection site (Station 10, 4° 52.71°N, 51° 21.59°W; S = 21.0; T = 29.6°C), located ~ 500 Km to the north of the Amazon River mouth, was characterized by the presence of coastal diatoms in the top 8 m of the water column. Sampling was conducted between 0700 and 0900 local time by gently impeller pumping (modified Rule 1800 submersible sump pump) surface water through 10 m of tygon tubing (3 cm) to the ship's deck where it then flowed through a 156 µm mesh into 20 L carboys. In the lab, cells were partitioned into two size fractions by sequential filtration (using a Masterflex peristaltic pump) of the pre-filtered seawater through a 2.0 µm pore-size, 142 mm diameter polycarbonate (PCTE) membrane filter (Sterlitech Corporation, Kent, CWA) and a 0.22 µm pore-size, 142 mm diameter Supor membrane filter (Pall, Port Washington, NY). Metagenomic and non-selective metatranscriptomic analyses were conducted on both pore-size filters; poly(A)-selected (eukaryote-dominated) metatranscriptomic analyses were conducted only on the larger pore-size filter (2.0 µm pore-size). All filters were immediately submerged in RNeasy Lysis Buffer (Applied Biosystems, Austin, TX) in sterile 50 mL conical tubes, incubated at room temperature overnight and then stored at -80°C until extraction. Filtration and stabilization of each sample was completed within 30 min of water collection. Additionally, samples were collected and preserved for flow cytometry. After staining with 1X SYBR Green II and incubating in the dark for at least 10 minutes, samples were analyzed using a Beckman Coulter Cyan flow cytometer with an excitation wavelength of 488nm and emission detection filter of 530nm. Bacterial cells were quantified using a combination of light scatter and fluorescence detection with a bead standard of known concentration used to calculate the volume counted by the machine.

### *Total Community RNA Processing for Metatranscriptomes*

Prior to RNA extraction, the filters were thawed, removed from the preservative solution, placed in Whirl-Pak® bags (Nasco, Fort Artkinson, WI), and flash-frozen in liquid nitrogen. RNA extraction and DNA removal were carried out as previously described (1-3). In brief, a lysis tube was prepared for each sample consisting of a sterile 50 mL conical tube containing 8 mL of RLT Lysis Solution (Qiagen, Valencia, CA), 3 grams of RNA PowerSoil beads (Mo-Bio, Carlsbad, CA), and internal standards (described below). Filters inside the bags were broken into small pieces using a rubber mallet and transferred to the lysis tubes. Tubes were vortexed for 10 min to lyse cells, and RNA was purified from cell lysate using an RNeasy Kit (Qiagen, Valencia, CA) followed by two successive treatments with the Turbo DNA-free kit (Invitrogen, Carlsbad, CA) to completely remove residual DNA. Ribosomal RNA (rRNA) was selectively removed using community-specific biotinylated-rRNA probes prepared with DNA from a sample collected simultaneously (4). To maximize the removal of rRNA, probes were created for Bacterial and Archaeal 16S and 23S rRNA and Eukaryotic 18S and 28S rRNA. Probe-bound rRNA was removed via hybridization to streptavidin-coated magnetic beads (New England Biolabs, Ipswich, MA), and successful removal of rRNA from the samples was confirmed using either an Experion automated electrophoresis system (Bio-Rad Laboratories, Hercules, CA) or a Bioanalyzer (Agilent Technologies, Santa Clara, CA). rRNA-depleted samples were linearly amplified using the MessageAmp II-Bacteria Kit (Applied Biosystems, Austin, TX), and amplified mRNA was converted into cDNA using the Superscript III First Strand synthesis system (Invitrogen, Carlsbad, CA) with random primers, followed by the NEBnext mRNA second strand synthesis module (New England Biolabs, Ipswich, MA), both according to manufacturer protocols. Synthesized cDNA was purified using the QIAquick PCR purification kit (Qiagen, Valencia, CA) followed by EtOH precipitation, resuspended in 100 µL of TE buffer and stored at -80° C until library preparation for sequencing.

### *Poly(A)-tail Selected RNA Processing for Metatranscriptomes*

To ensure sufficient coverage of eukaryotic transcriptomes, a second metatranscriptome protocol was used that selectively sequenced messages with poly(A) tails; this was carried out for the >2.0 µm pore-size filter only. Samples were prepared as described above with the following exceptions. Each lysis tube was prepared with 9 mL of RLT Lysis Solution, 250 µL of zirconium beads (OPS Diagnostics, Lebanon, NJ, USA), and an internal poly(A)-tailed mRNA standard (see below). Following lysis, poly(A)-tailed mRNA was isolated from total RNA using an Oligotex mRNA kit (Qiagen, Valencia, CA), and mRNA was linearly amplified with a MessageAmp II-aRNA Amplification Kit (Applied Biosystems, Austin, TX). Double stranded cDNA was prepared as described above except without ethanol precipitation.

### *DNA Processing for Metagenomes*

DNA was extracted and purified as previously described (5-7) with some modification. Briefly, each filter was thawed, removed from the preservative solution, and rinsed three times in autoclaved, filter-sterilized, 0.1% phosphate-buffered saline (PBS) to remove any residual RNA later. Each filter was shattered as described above and placed in a tube containing DNA extraction buffer [DEB: 0.1 M Tris-HCl (pH 8), 0.1 M Na-EDTA (pH 8), 0.1 M Na<sub>2</sub>H<sub>2</sub>PO<sub>4</sub> (pH 8), 1.5 M NaCl, 5% CTAB]. All liquid from the rinses as well as the original RNA later was pushed through a 0.2 μm Sterivex-GP filter capsule (EMD Millipore, Billerica, MA), which was subsequently rinsed 3 times to salvage any lost cells. The capsule was opened and the filter sliced into pieces and added to the tube with the original membrane filter and an internal genomic DNA standard (described below). Following treatments with proteinase-K, lysozyme, and sodium dodecyl sulfate, DNA was purified via phenol:chloroform extraction and isopropanol precipitation.

### Sequencing

cDNA and DNA was sheared ultrasonically to ~200-250 base pair fragments and TruSeq libraries (Illumina Inc., San Diego, CA) were constructed for paired-end (2 x 150) sequencing using the Illumina Genome Analyzer IIx sequencing platform (Illumina Inc., San Diego, CA).

### Internal Standards

Omics processing included the addition of internal standards (8) to allow for calculation of volume-based absolute copy numbers for each gene or transcript type, rather than just relative quantification (i.e., counts L<sup>-1</sup> rather than percent of sequence library). Two mRNA standards without poly(A) tails (to mimic prokaryotic and organelle mRNAs) were synthesized by *in vitro* transcription using a method modified from (1). The standards were constructed by linearizing a pTXB1 vector (New England Biolabs, Ipswich, MA) with *Nco*I restriction enzyme (New England Biolabs, Ipswich, MA) or pFN18A Halotag T7 Flexi Vector (Promega, Madison, WI) with *Bam*HI restriction enzyme (New England Biolabs, Ipswich, MA). Each was purified by phenol:chloroform:isoamyl alcohol extraction and ethanol precipitation. The 5' nucleotide overhangs were removed using Mung Bean Nuclease (New England Biolabs, Ipswich, MA), followed by purification via phenol:chloroform:isoamyl alcohol extraction and ethanol precipitation. Complete digestion of the vector was confirmed on a 1% agarose gel. The DNA fragment was then transcribed *in vitro* using the Riboprobe *in vitro* Transcription System (Promega, Madison, WI) according to the manufacturer's protocol using a T7 RNA polymerase to create 916 nt (pTXB1 standard) or 970 nt (pFN18A) artificial transcripts. Residual DNA was removed using RQ1 RNase-Free DNase and the RNA was purified by phenol:chloroform:isoamyl alcohol extraction and ethanol precipitation. The RNA standards were quantified using the Quant-iT Ribogreen RNA Reagent and Kit (Invitrogen, Carlsbad, CA), and RNA nucleotide length was confirmed with an Experion automated electrophoresis system (Bio-Rad Laboratories, Hercules, CA). A known number of each standard (pTXB1 = 2.104 x 10<sup>10</sup> copies; pFN18A = 1.172 x 10<sup>10</sup> copies) was added independently to each lysis tube immediately prior to the addition of the sample filter.

An mRNA standard with a poly(A) tail (to mimic eukaryotic nuclear mRNA) was created from an HAP-1 Protelomerase viral gene. To create the standard, a 544 bp amplicon containing a poly(A) tail and a T7 promoter was produced from the template DNA through PCR. The PCR amplicons were then used as the template DNA for an *in vitro* transcription reaction to produce the resulting 499 nucleotide poly(A)-tailed mRNA. The addition of 2.0 x 10<sup>9</sup> copies of the standard occurred immediately prior to cell lysis.

The genomic internal standard for metagenomic samples consisted of *Thermus thermophilus* DSM7039 [HB8] genomic DNA (American Type Culture Collection, Manassas, VA) added immediately prior to cell lysis. The amount of DNA standard added was estimated to be ~ 1% (8.4 ng per liter filtered) of sample DNA based on yields of DNA from a typical filter (Table S1).

### 16S and 18S rRNA tag sequencing

DNA was PCR-amplified in four replicate 20 μl reactions using bacterial 16S ribosomal RNA gene primers. The bacteria-specific forward primer began at 27F in the V2 region and included a 454B FLX linker (GCCTTGCCAGCCCGCTCAG TC AGRGTTTGATYMTGGCTCAG). The reverse primer began at 338R and included a 454A linker and a unique 8 base pair barcode (denoted by N in primer sequence; GCCTCCCTCGCGCCATCAG NNNNNN CA TGCGWCCWCCCGTAGGWGT) (Modified from (9)). Products from replicate amplifications were combined and purified with the S.N.A.P. UV-Free Gel Purification Kit (Invitrogen, Carlsbad, CA) by gel isolation from a 0.8% agarose gel. Purified samples were sent for pyrosequencing on a Roche-454 FLX Pyrosequencer at Engencore at the University of South Carolina using titanium chemistry (<http://engencore.sc.edu/>).

### Bioinformatics

Following sequencing, paired-end Illumina reads were joined using the She-ra program (10) with the default parameters and a quality metric score of 0.5. Paired reads were trimmed using Seqtrim (11) with default settings. To remove rRNA, tRNA, and internal standard sequences from the metatranscriptome reads, a Blastn

search was performed against a database containing representative ribosomal RNA and tRNA sequences along with the internal standard sequences. All reads with a bit score greater  $\geq 50$  to one of the sequences in the database were removed (1). To remove internal standard sequences from the metagenome reads, a Blastn search against the *T. thermophilus* HB8 genome was carried out, and any hits from the metagenome sequences with a bit score  $\geq 50$  were queried against the RefSeq protein database using a Blastx search; hits matching *Thermus thermophilus* proteins with a bit score  $\geq 40$  were designated as internal standard.

Reads representing genes or transcripts of 74 selected biogeochemically-relevant genes were identified using a Blastx search against a custom database consisting of multiple reference sequences from diverse taxa for each gene, along with paralogs having sequences most similar to the gene of interest. This gene-specific reference database was tested on a subset of Amazon reads using a bit score  $\geq 40$ , and re-analysis of the positive reads against the RefSeq protein database was used to adjust the composition of the database. To obtain an estimate of error that was propagated through the calculations, a Poisson distribution was generated for each gene using the rpois function in R with the lambda parameter equal to the count of reads and 10,000 randomly sampled values returned. The Poisson distributions were converted to normalized count distributions (copies  $L^{-1}$ ) and then averaged together for replicate samples. The resulting distributions were used to calculate expression ratios for each gene by dividing the transcripts  $L^{-1}$  distribution by the genes  $L^{-1}$  distribution. Expression ratios between size fractions were considered significantly different when separated by 2 standard deviations. For comparison, a one-tailed statistical comparison was also performed using Welch's T-test, an adaptation of the standard T-test for two samples with unequal variances. Of the 55 genes identified to have significantly different ratios based on 2 standard deviations of the Poisson distribution, 50 of these (91%) had p-values of 0.1 or less with the Welch's T-test, while the remaining 5 had p-values of  $< 0.14$ .

Cell numbers of the transcriptionally dominant prokaryotic organisms (those contributing the most transcripts to samples from this station) were estimated based on the metagenomic coverage of each reference genome. The number of protein encoding reads identified in the metagenomes (ACM3 and ACM4) for each taxon (found with a Blastx analysis of the metagenomic reads against the Refseq protein database) was divided by the number of protein encoding genes present in the reference genome for corresponding taxon. This average fold-coverage of the genes was used as an index of genome copy number, and we assumed one genome copy per cell.

Three of the most dominant prokaryotic organisms were used for a genome-wide comparative expression analysis between the two size fractions. Protein encoding reads binning to each of the three taxonomic bins were identified using Blastx against the Refseq protein database. KEGG GENE assignments for reads binning to CB0205, HTCC7211, and HTCC2080 were obtained by annotating the reference proteins against KEGG GENES using the KEGG Automatic Annotation Server (KAAS) (12) and KEGG pathway reconstruction was performed using MinPath (13). For each individual gene or pathway in a taxonomic bin, Poisson distributions were randomly generated using the rpois function in R with the lambda parameter equal to the count of reads, with 10,000 randomly sampled values returned. The resulting distributions were then averaged between replicate samples, and the mean and standard deviation from the resulting distributions were determined. These calculations were performed on each of the two size fractions, and each gene within a taxonomic bin was compared between the fractions. Genes or pathways were designated as differentially expressed when at least 2 standard deviations existed between the average values for each size fraction.

Ribosomal RNA gene sequences in the metagenomes were identified by mapping paired reads to 16S and 18S rRNA sequence databases with Bowtie2 (2.0.0-beta5) using local alignment mode with default options. Hits were classified with the classify.seqs program in mothur (1.24.0) (14) using a minimum bootstrap cutoff of 80%. Each end of the paired-end reads was also mapped individually to 16S and 18S rRNA sequence databases using the Bowtie2 end-to-end alignment mode with default options. Both members of the paired-end reads were classified with RTAX (v0.983) (15) in forward and reverse directions, and the read with the higher RTAX value of the pair was retained. The Greengenes 16S rRNA 99% OTUs (v.12.10) database (16) was used for classification of paired reads using mothur, the Greengenes 16S rRNA 97% OTUs (v.12.10) was used for unpaired reads using RTAX (due to limitations of the program), and a custom database of 18S rRNA genes modified from the Silva-euks (v.108) database (17) after removal of sequences with more than 5 ambiguous bases (1953 seqs), homopolymers greater than 10 bp (527 seqs), and long polymers of 6bp repeats (7 seqs). Eukaryotic taxonomy strings in this database were manually reduced to Kingdom, Phylum, Class, Order, Family, Genus, and Species.

Ribosomal RNA gene sequences from the tag sequencing were processed on the Data Intensive Academic Grid (DIAG) shared computational cloud at the University of Maryland School of Medicine Institute for Genome Sciences (IGS) with the AmpliconNoise pipeline (18), using recommended procedures for quality control (CleanMinMax.pl, PyroNoiseT, SeqDistT, SeqNoiseT). Maximum sequence length was set to 250 base pairs (Parse.pl), and chimeras were identified and removed (PerseusD). Sequences were clustered into operational taxonomic units (OTUs) using Qiime, and sequences from each sample were unweighted (unweight\_fasta.py), concatenated, and subjected to primers removal. OTUs were identified using uclust

(pick\_otus.py), and representative sequences were selected (pick\_rep\_set.py). The taxonomy of OTUs was determined in MacQIIME (assign\_taxonomy.py), retraining the RDP Classifier to use the October 2012 Greengenes taxonomic database (16).

## References:

1. Gifford SM, Sharma S, Rinta-Kanto JM, Moran MA (2011) Quantitative analysis of a deeply sequenced marine microbial metatranscriptome. *ISME J* 5(3):461-472.
2. Poretsky RS, Gifford S, Rinta-Kanto J, Vila-Costa M, Moran MA (2009) Analyzing gene expression from marine microbial communities using environmental transcriptomics. *J Vis Exp* (24).
3. Poretsky RS, *et al.* (2009) Comparative day/night metatranscriptomic analysis of microbial communities in the North Pacific subtropical gyre. *Environ Microbiol* 11(6):1358-1375.
4. Stewart FJ, Ottesen EA, DeLong EF (2010) Development and quantitative analyses of a universal rRNA-subtraction protocol for microbial metatranscriptomics. *ISME J* 4(7):896-907.
5. Crump BC, Armbrust EV, Baross JA (1999) Phylogenetic analysis of particle-attached and free-living bacterial communities in the Columbia river, its estuary, and the adjacent coastal ocean. *Appl Environ Microbiol* 65(7):3192-3204.
6. Zhou J, Bruns MA, Tiedje JM (1996) DNA recovery from soils of diverse composition. *Appl Environ Microbiol* 62(2):316-322.
7. Crump BC, Kling GW, Bahr M, Hobbie JE (2003) Bacterioplankton community shifts in an arctic lake correlate with seasonal changes in organic matter source. *Appl Environ Microbiol* 69(4):2253-2268.
8. Satinsky BM, Gifford SM, Crump BC, Moran MA (2013) Use of internal standards for quantitative metatranscriptome and metagenome analysis. *Meth Enzymol*, ed DeLong EF (Academic Press), Vol 531, pp 237-250.
9. Hamady M, Walker JJ, Harris JK, Gold NJ, Knight R (2008) Error-correcting barcoded primers for pyrosequencing hundreds of samples in multiplex. *Nature Meth* 5(3):235-237.
10. Rodrigue S, *et al.* (2010) Unlocking short read sequencing for metagenomics. *PLoS One* 5(7):e11840.
11. Falgueras J, *et al.* (2010) SeqTrim: a high-throughput pipeline for pre-processing any type of sequence read. *BMC Bioinformatics* 11:38.
12. Moriya Y, Itoh M, Okuda S, Yoshizawa AC, Kanehisa M (2007) KAAS: an automatic genome annotation and pathway reconstruction server. *Nucleic Acids Res* 35:W182-185.
13. Ye Y, Doak TG (2009) A parsimony approach to biological pathway reconstruction/inference for genomes and metagenomes. *PLoS Comput Biol* 5(8):e1000465.
14. Schloss PD, *et al.* (2009) Introducing mothur: open-source, platform-independent, community-supported software for describing and comparing microbial communities. *Appl Environ Microbiol* 75(23):7537-7541.
15. Soergel DA, Dey N, Knight R, Brenner SE (2012) Selection of primers for optimal taxonomic classification of environmental 16S rRNA gene sequences. *ISME J* 6(7):1440-1444.
16. McDonald D, *et al.* (2012) An improved Greengenes taxonomy with explicit ranks for ecological and evolutionary analyses of bacteria and archaea. *ISME J* 6(3):610-618.
17. Quast C, *et al.* (2013) The SILVA ribosomal RNA gene database project: improved data processing and web-based tools. *Nucleic Acids Res* 41:D590-596.
18. Quince C, Lanzen A, Davenport RJ, Turnbaugh PJ (2011) Removing noise from pyrosequenced amplicons. *BMC Bioinformatics* 12:38.

### Supplemental Figure Legends:

Figure S1. Taxonomic composition of the prokaryotic community in the Amazon River plume in June 2010 (Station 10).

Figure S2. Comparative taxonomic composition of free-living (FL) and particle-associated (PA) prokaryotic communities at six stations along the Amazon River plume in June 2010 as identified from taxonomic assignments of protein-encoding metagenomic reads.

Figure S3. Relative contribution of the top 24 prokaryotic taxa to the genes and transcripts in the particle-associated community of the Amazon River plume.

Figure S4. Percent identity of metagenomic reads to the reference genome for universal single-copy genes *rpoB* (red), *gyrB* (green), and *recA* (blue) for the three most abundant taxa in the FL (dashed line) and PA (solid line) communities.

Figure S5. The importance of cell abundance versus gene regulation to the differential contribution of PA cells to the Amazon Plume metatranscriptome for three major bacterial taxa. For each taxon, the direction and magnitude of the difference in PA cells compared to FL cells that is attributed to each factor is shown for the 25 genes with the most positive and most negative differences, and KEGG pathway assignments are indicated by color-coded circles.

Figure S6. Photosynthesis-related genes in the *Synechococcus* sp. CB0205 bin exhibiting significantly different regulation between microenvironments. Gene functional annotations are based on KEGG pathways ko00195, ko00196, ko00710. Maroon = upregulated in free-living cells. No photosynthesis genes were upregulated in particle-associated cells

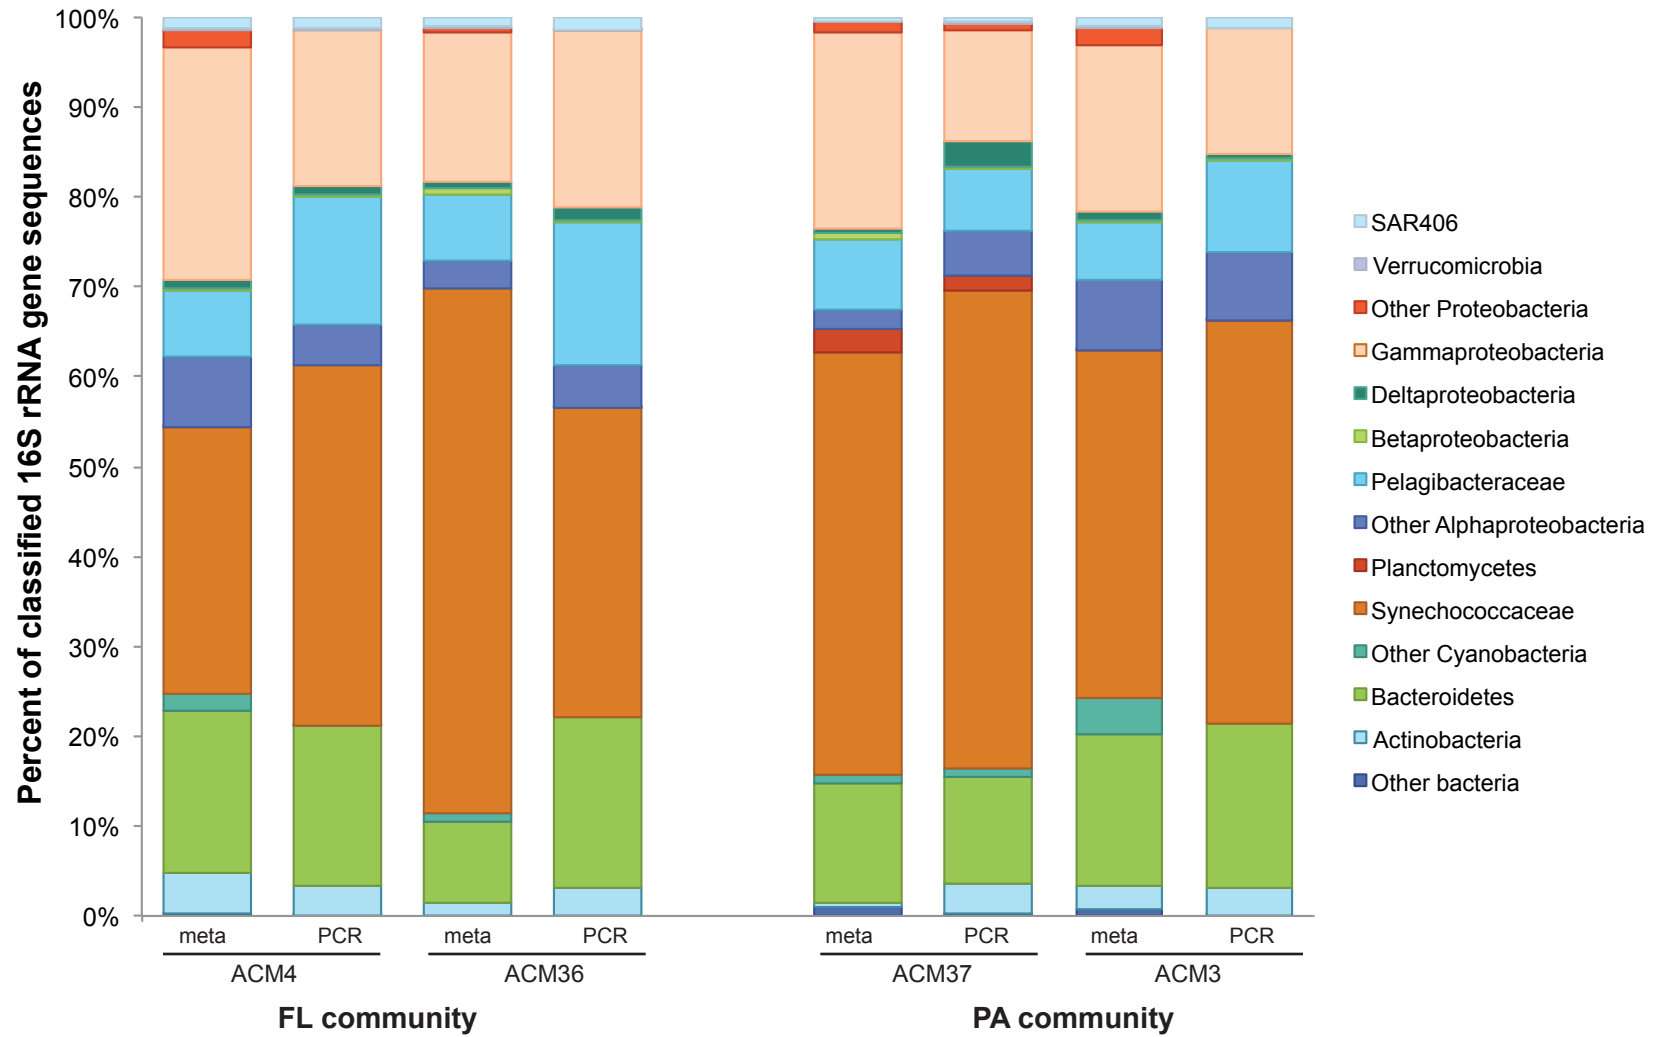

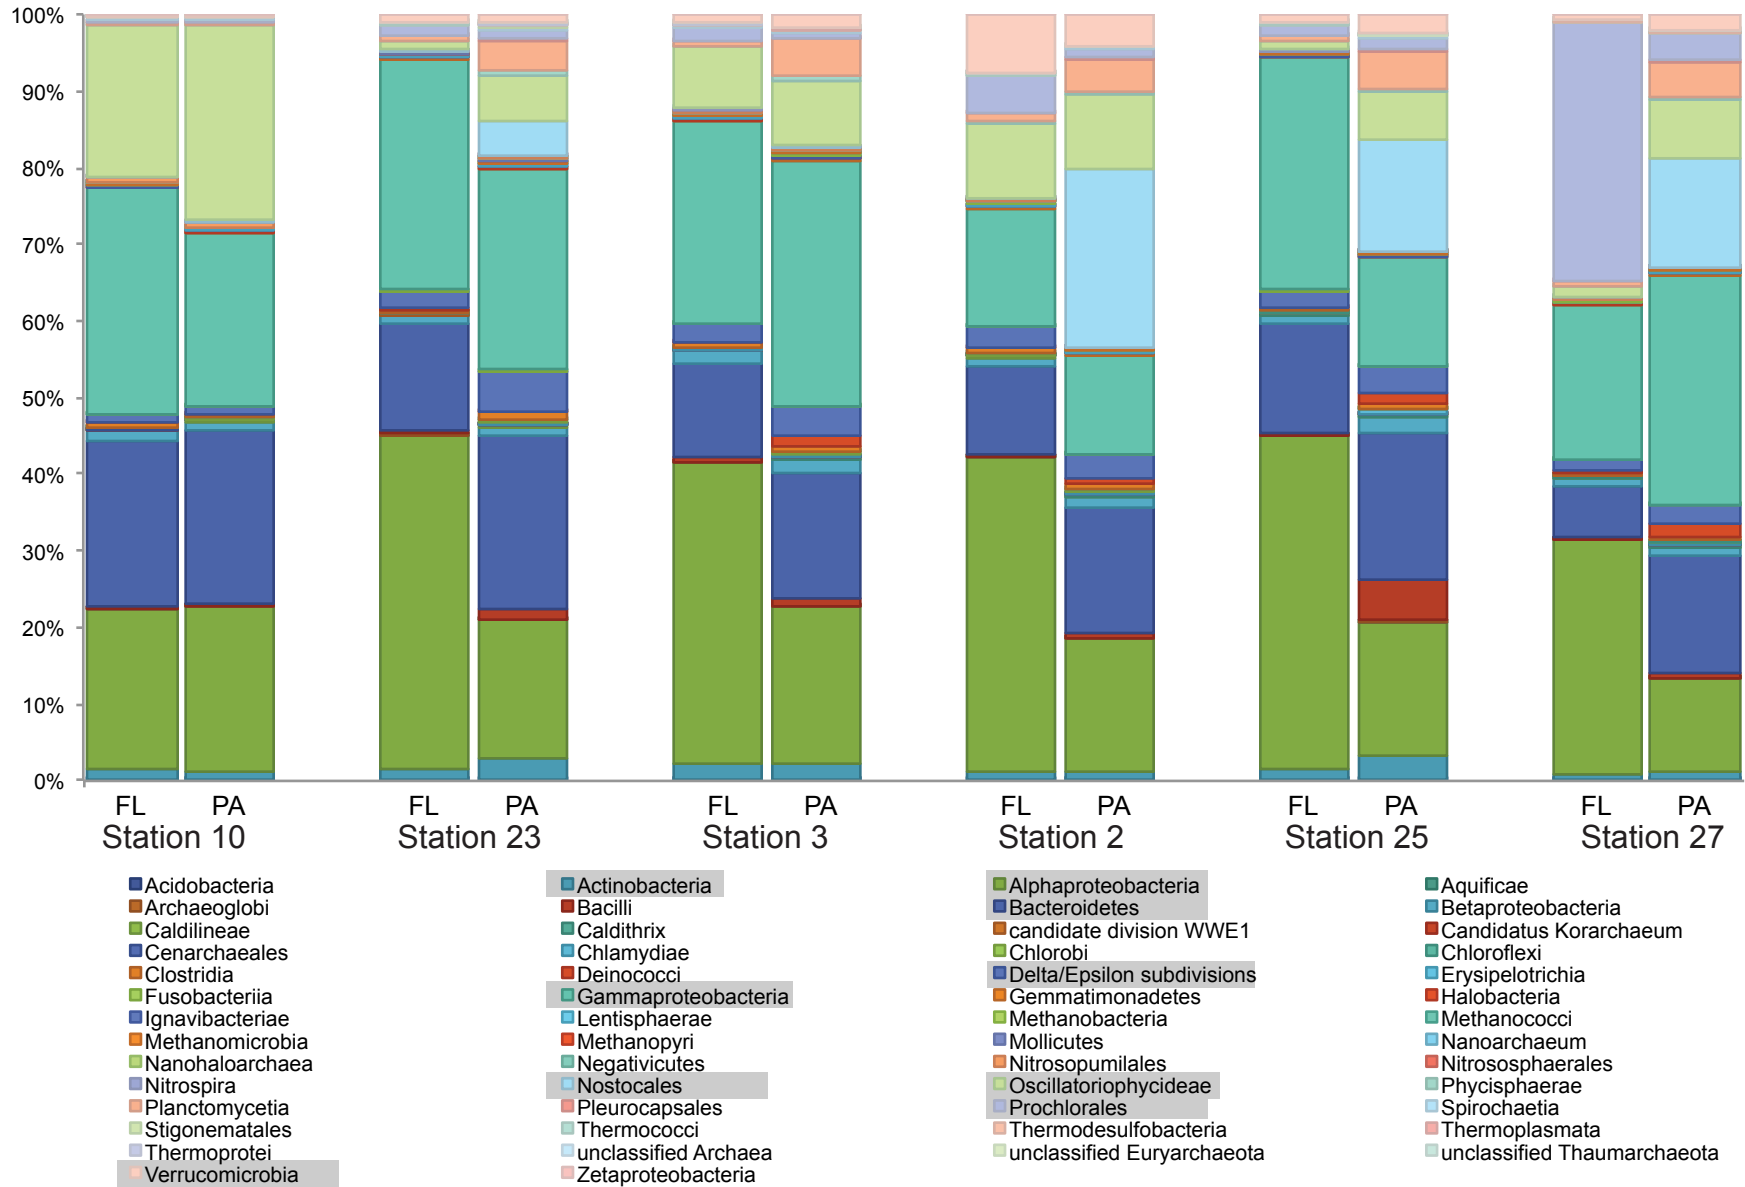



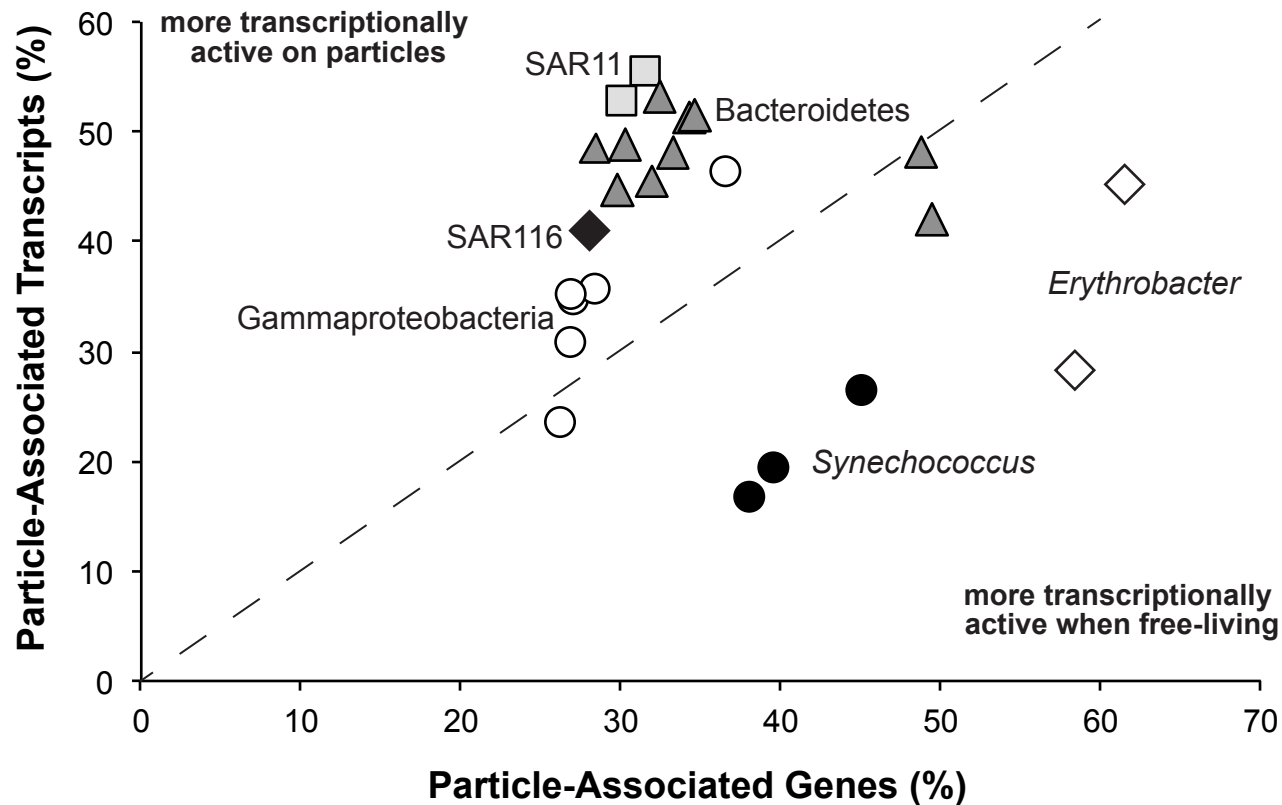

**HTCC7211**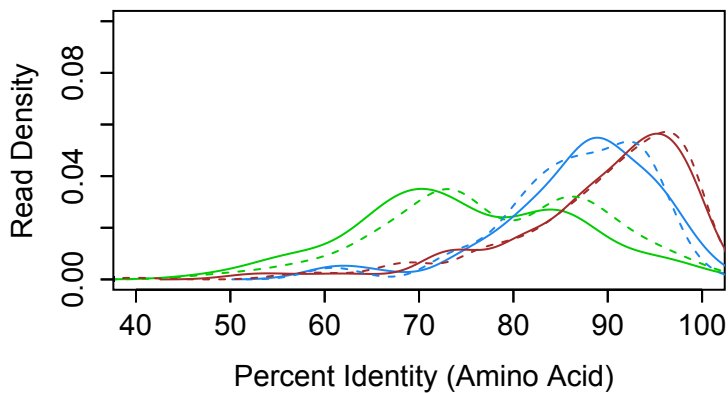**HTCC2080**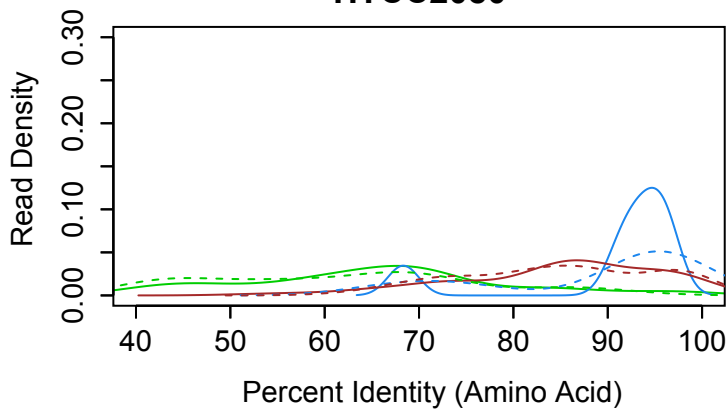**CB0205**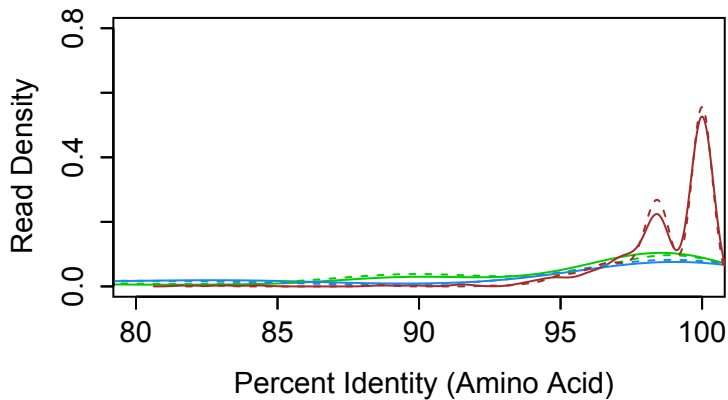

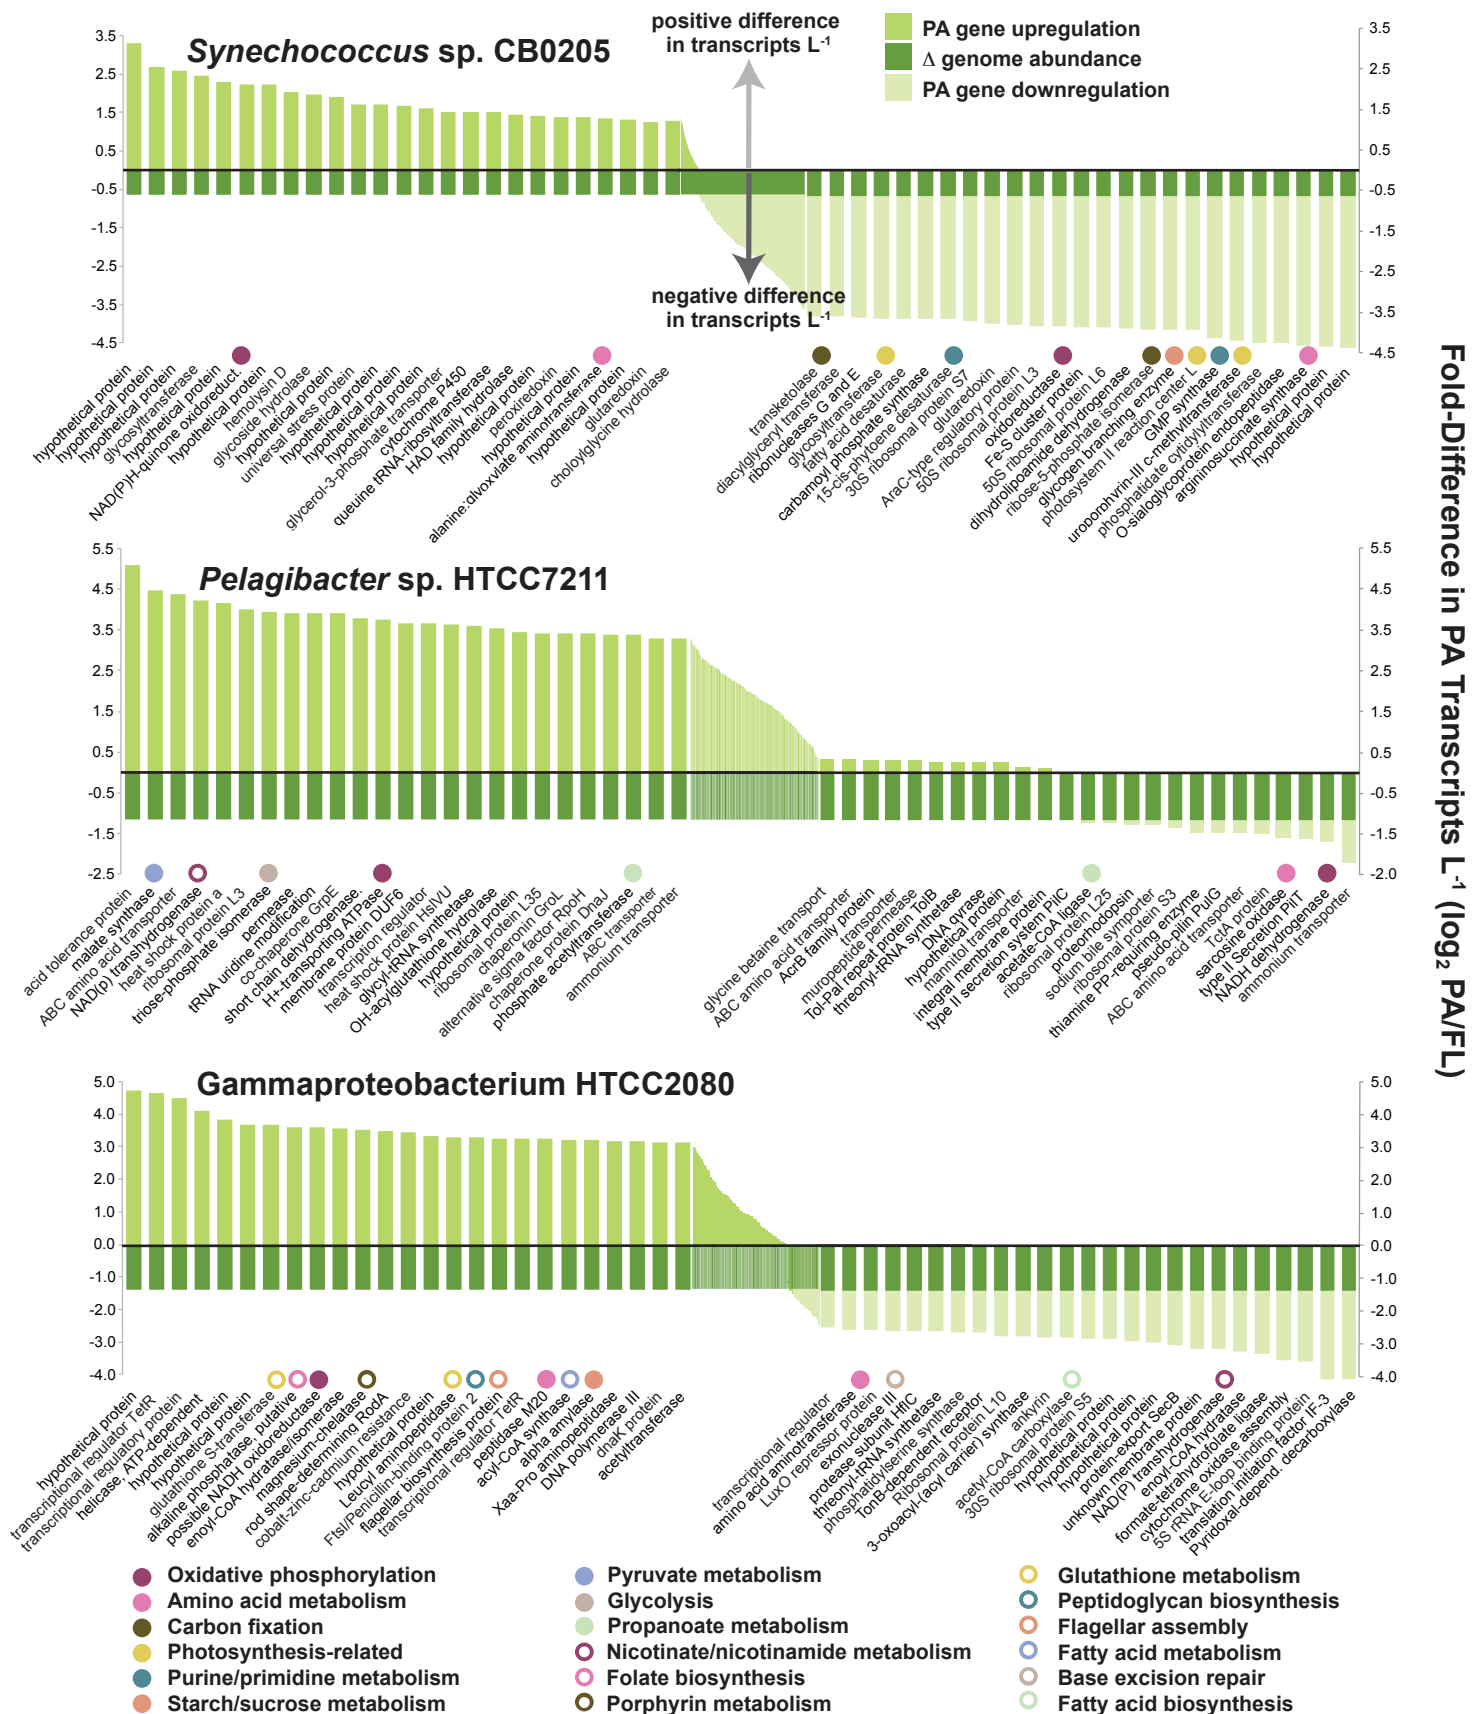

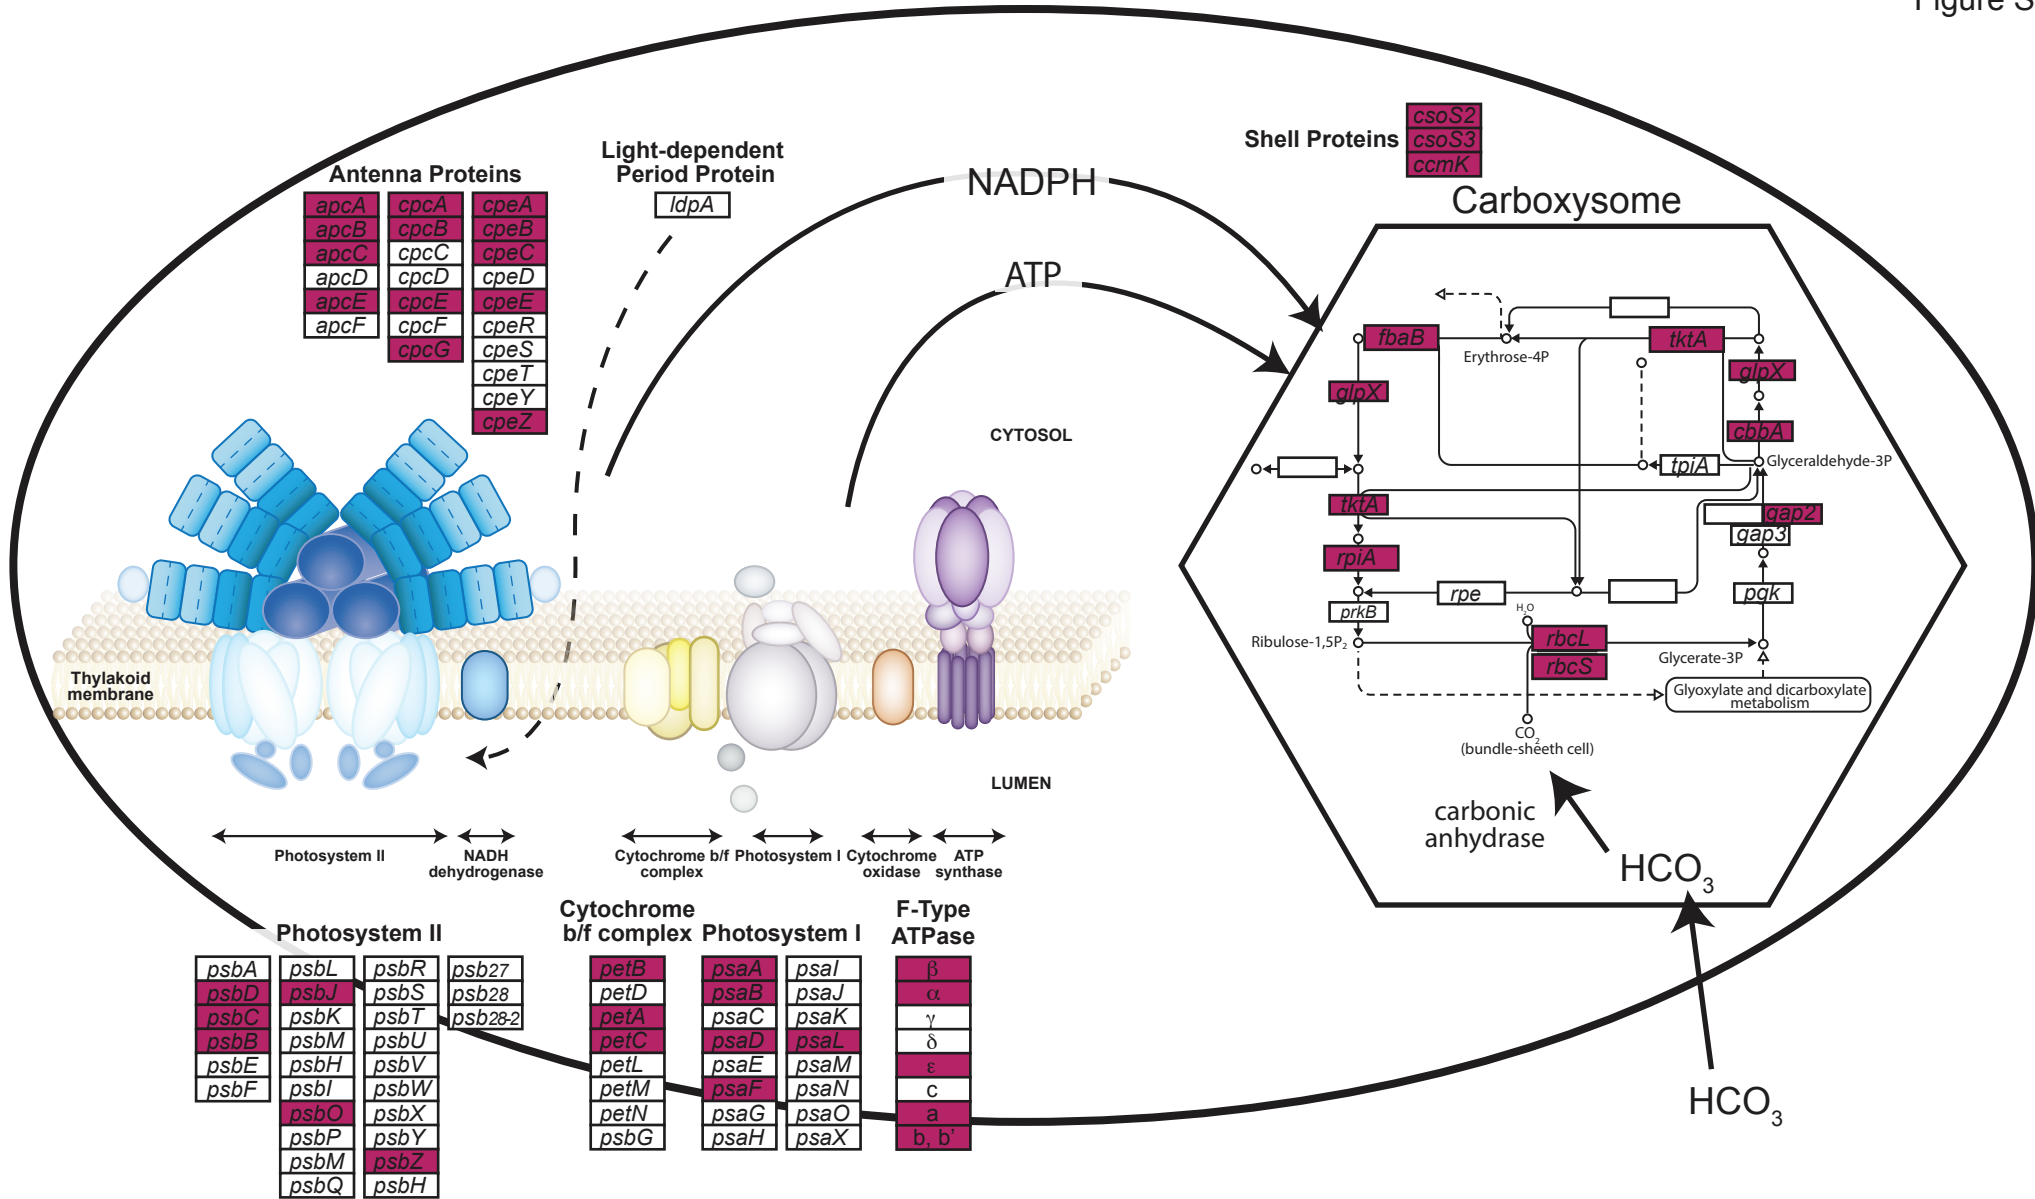

Table S1. Internal standard addition and recoveries.

|                                                      | Sample             | Standard<br>Copies<br>Added | Standard<br>Copies<br>Recovered | Sequencing<br>Depth (%) | Volume<br>Filtered<br>(L) | Normalization<br>Factor |
|------------------------------------------------------|--------------------|-----------------------------|---------------------------------|-------------------------|---------------------------|-------------------------|
| Metatranscriptomes                                   |                    |                             |                                 |                         |                           |                         |
| Standard 1<br>(pTXB1, 916 nt)                        | ACM11              | $2.10 \times 10^{10}$       | 19,640                          | $9.25 \times 10^{-5}$   | 5.9                       | $1.81 \times 10^5$      |
|                                                      | ACM29              | $2.10 \times 10^{10}$       | 13,769                          | $6.54 \times 10^{-5}$   | 4.8                       | $3.18 \times 10^5$      |
|                                                      | ACM12              | $2.10 \times 10^{10}$       | 22,233                          | $10.57 \times 10^{-5}$  | 5.9                       | $1.60 \times 10^5$      |
|                                                      | ACM30              | $2.10 \times 10^{10}$       | 7,793                           | $3.70 \times 10^{-5}$   | 3.3                       | $8.18 \times 10^5$      |
| Standard 2<br>(pFN18A, 970 nt)                       | ACM11              | $1.17 \times 10^{10}$       | 11,350                          | $9.68 \times 10^{-5}$   | 5.9                       | $1.75 \times 10^5$      |
|                                                      | ACM29              | $1.17 \times 10^{10}$       | 6,313                           | $5.39 \times 10^{-5}$   | 4.8                       | $3.87 \times 10^5$      |
|                                                      | ACM12              | $1.17 \times 10^{10}$       | 8,404                           | $7.17 \times 10^{-5}$   | 5.9                       | $2.36 \times 10^5$      |
|                                                      | ACM30              | $1.17 \times 10^{10}$       | 3,139                           | $2.68 \times 10^{-5}$   | 3.3                       | $1.13 \times 10^6$      |
| Metagenomes                                          |                    |                             |                                 |                         |                           |                         |
| <i>Thermus<br/>thermophilus</i> HB8<br>(Genomic DNA) | ACM4               | $1.86 \times 10^7$          | 1,428                           | $7.66 \times 10^{-6}$   | 4.8                       | $2.72 \times 10^6$      |
|                                                      | ACM36 <sup>†</sup> | -                           | -                               | -                       | 5.2                       | -                       |
|                                                      | ACM3               | $2.02 \times 10^7$          | 1,654                           | $8.19 \times 10^{-6}$   | 5.2                       | $2.35 \times 10^6$      |
|                                                      | ACM37              | $1.86 \times 10^7$          | 0,287                           | $1.54 \times 10^{-6}$   | 4.8                       | $1.35 \times 10^7$      |
| Poly(A) Metatranscriptomes                           |                    |                             |                                 |                         |                           |                         |
| Standard 3<br>(HAP-1, 499 nt)                        | ACM8               | $2.00 \times 10^9$          | 17,455                          | $8.73 \times 10^{-4}$   | 5.5                       | $2.08 \times 10^4$      |
|                                                      | ACM27              | $2.00 \times 10^9$          | 11,362                          | $5.68 \times 10^{-4}$   | 7.4                       | $1.54 \times 10^3$      |

<sup>†</sup>Standards were added incorrectly to sample ACM36; gene normalization was estimated based on replicate sample ACM4.

Table S2. IDs and descriptions of 74 biogeochemically relevant genes.

| ID               | Gene/Protein                                                | Description                                                                                                                                                                                                                      |
|------------------|-------------------------------------------------------------|----------------------------------------------------------------------------------------------------------------------------------------------------------------------------------------------------------------------------------|
| <i>pepA</i>      | Glutamyl aminopeptidase                                     | Calcium-stimulated exopeptidase that selectively hydrolyze acidic amino acid residues with a preference for certain Glutamine                                                                                                    |
| <i>pepL</i>      | Leucyl aminopeptidase                                       | Hydrolytic exopeptidase with a preference for certain Leucine and hydrophobic amino acid substrates                                                                                                                              |
| <i>pepM</i>      | Methionyl aminopeptidase                                    | Ubiquitous, essential exopeptidase that cleaves N-terminal Methionine residues from cellular proteins                                                                                                                            |
| <i>pepN</i>      | Alanyl aminopeptidase                                       | Broad specificity exopeptidase that cleaves amino acid residues from the N-terminus of peptides and protein substrates with a preference for certain Alanine                                                                     |
| <i>pepP/pepX</i> | Prolyl aminopeptidase (PAP) or Xaa-Pro aminopeptidase (XAP) | PAPs preferentially cleave N-terminal proline residues from cellular proteins; XAPs are prolidases that catalyze the cleavage of Xaa-Pro dipeptides or act on aminoacyl-hydroxyproline analogs but does not act on Pro-Pro bonds |
| <i>GAPDH</i>     | Glyceraldehyde-3-phosphate dehydrogenase                    | Catalyzes the reversible interconversion of glyceraldehyde-3-phosphate and 1,3-diphosphoglycerate                                                                                                                                |
| <i>pgi</i>       | Glucose-6-phosphate isomerase                               | Catalyzes the reversible isomerization of glucose-6-phosphate and fructose-6-phosphate                                                                                                                                           |
| <i>metF</i>      | Methylenetetrahydrofolate reductase                         | Catalyzes the reduction of 5,10-methylenetetrahydrofolate to 5-methyltetrahydrofolate, which is then further used in the final step of methionine biosynthesis                                                                   |
| <i>bglA</i>      | Beta-glucosidase                                            | Catalyzes the hydrolysis of terminal non-reducing residues in beta-glucosides with release of glucose                                                                                                                            |
| <i>pcaH</i>      | Protocatechuate 3,4-dioxygenase (3,4-PCD)                   | Part of the $\beta$ -ketoacid pathway that catalyzes the conversion of protocatechuate to citric acid cycle intermediates                                                                                                        |
| <i>vanA</i>      | Vanillate demethylase                                       | Involved in vanillate (a lignin-derived monoaryl) degradation by vanillate-utilizing aerobic bacteria                                                                                                                            |
| <i>phaC</i>      | Polyhydroxyalkanoate synthase                               | Catalyzes the polymerization of (R)-3-hydroxybutyryl-CoA to form the polyhydroxyalkanoate polymer, the last step in polyhydroxyalkanoate biosynthesis                                                                            |
| <i>phaP</i>      | Phasin                                                      | Coats the surface of the polyhydroxyalkanoate granules, preventing them from coalescing, in turn stabilizing the granules                                                                                                        |
| <i>phaR</i>      | Polyhydroxyalkanoate regulator                              | Transcriptional regulator of polyhydroxyalkanoate biosynthesis                                                                                                                                                                   |
| <i>phaZ</i>      | Polyhydroxyalkanoate depolymerase                           | Responsible for intracellular degradation of polyhydroxyalkanoate                                                                                                                                                                |
| <i>amoA</i>      | Ammonia monooxygenase subunit A                             | Catalyzes oxidation of ammonia to hydroxylamine, the first step in the oxidation of ammonia to nitrite.                                                                                                                          |
| <i>amtB</i>      | Ammonium transporter B                                      | Membrane-bound ammonium/methylammonium transport B protein thought to be required during low $[NH(x)]$                                                                                                                           |
| <i>cphA</i>      | Cyanophycin synthetase                                      | Catalyzes the synthesis of cyanophycin granule polypeptide (CGP), which is used as a temporary nitrogen reserve.                                                                                                                 |
| <i>cphB</i>      | Cyanophycinase                                              | Hydrolyzes cyanophycin to the dipeptide $\beta$ -Asp-Arg, the first step in making stored amino acids available to the cell                                                                                                      |
| <i>glnA</i>      | Glutamine synthetase                                        | Catalyzes the ATP-dependent cycle whereby ammonia is incorporated into glutamate to form glutamine, the first step for ammonia assimilation into organic nitrogen                                                                |
| <i>napA</i>      | Nitrate reductase subunit A                                 | Large subunit of the Nap periplasmic nitrate reductase that catalyzes the first step of the denitrification process by conversion of nitrate to nitrite                                                                          |
| <i>nirK</i>      | Nitrite reductase                                           | Key enzyme in the dissimilatory denitrification process that catalyzes the reduction of nitrite to NO                                                                                                                            |
| <i>phnD</i>      | Phosphonate ABC transporter, periplasmic binding protein    | Periplasmic binding protein of an ABC-type transporter system required for utilization of phosphonates and organophosphorus compounds                                                                                            |
| <i>phnE</i>      | Phosphonate ABC transporter, integral membrane protein      | Integral membrane protein of an ABC-type transporter system required for utilization of phosphonates and organophosphorus compounds                                                                                              |
| <i>phnG</i>      | C-P lyase                                                   | Part of a membrane associated C-P lyase complex required for hydrolysis of C-P bonds to yield inorganic phosphate and the corresponding hydrocarbons.                                                                            |
| <i>phnH</i>      | C-P lyase                                                   | Part of a membrane associated C-P lyase complex required for hydrolysis of C-P bonds to yield inorganic phosphate and the corresponding hydrocarbons                                                                             |
| <i>phnM</i>      | C-P lyase                                                   | Part of a membrane associated C-P lyase complex required for hydrolysis of C-P bonds to yield inorganic phosphate and the                                                                                                        |

|             |                                                            |                                                                                                                                                                                                                    |
|-------------|------------------------------------------------------------|--------------------------------------------------------------------------------------------------------------------------------------------------------------------------------------------------------------------|
|             |                                                            | corresponding hydrocarbons                                                                                                                                                                                         |
| <i>phoA</i> | Alkaline phosphatase                                       | Dephosphorylates organic phosphates and is induced under phosphate starvation as a means to generate free phosphate groups for uptake and use                                                                      |
| <i>phoD</i> | Alkaline phosphatase                                       | Belongs to the Pho regulon and codes for codes for alkaline phosphatase D (APaseD), which is a secreted phosphodiesterase                                                                                          |
| <i>phoU</i> | Alkaline phosphatase                                       | Serves as a signal transduction mediator, being involved in free inorganic P transport and acting as a regulator of the phosphate-specific transport system                                                        |
| <i>phoX</i> | Alkaline phosphatase                                       | Encodes an alkaline phosphatase that uses $Ca^{2+}$ as a cofactor and can be responsible for extracellular phosphatase activity under phosphorus limitation                                                        |
| <i>pitA</i> | Low affinity $PO_4$ transporter                            | Low-affinity inorganic phosphate transporter and when inorganic phosphate is abundant, <i>pitA</i> is its major uptake system                                                                                      |
| <i>ppk1</i> | Polyphosphate kinase                                       | Reversibly synthesizes inorganic polyphosphate, a storage polymer made up of tens to hundreds of phosphate residues linked together by high-energy bonds                                                           |
| <i>ppk2</i> | Polyphosphate kinase                                       | Can polymerize into an actin-like filament concurrent with its reversible synthesis of inorganic polyphosphate                                                                                                     |
| <i>pstA</i> | Phosphate ABC transporter, permease                        | Membrane permease in the high-affinity phosphate-specific transport (Pst) system that facilitates the transport of phosphate across the membrane                                                                   |
| <i>pstC</i> | Phosphate ABC transporter, permease                        | Membrane permease in the high-affinity phosphate-specific transport (Pst) system that facilitates the transport of phosphate across the membrane                                                                   |
| <i>pstS</i> | Phosphate ABC transporter, periplasmic binding protein     | Phosphate-binding lipoprotein found within the periplasm of the cell, it is part of the high-affinity phosphate-specific transport (Pst) system                                                                    |
| <i>aprA</i> | Adenosine-5'-phosphosulfate reductase (Apr), alpha subunit | Subunit A of dissimilatory adenosine-5'-phosphosulfate (APS) reductase <i>aprAB</i> gene complex that catalyzes the reduction of APS to AMP and sulfite during sulfur reduction                                    |
| <i>aprB</i> | Adenosine-5'-phosphosulfate reductase (Apr), beta subunit  | Subunit B of dissimilatory adenosine-5'-phosphosulfate (APS) reductase <i>aprAB</i> gene complex that catalyzes the reduction of APS to AMP and sulfite during sulfur reduction                                    |
| <i>cysI</i> | Sulfite reductase                                          | Assimilatory sulfite reduction enzyme that catalyzes the reaction of sulfite to sulfide                                                                                                                            |
| <i>cysK</i> | Cysteine synthase                                          | Involved in sulfur metabolism and synthesizes cysteine, the predominant mechanism by which inorganic sulfur is reduced and incorporated into organic compounds                                                     |
| <i>dddD</i> | Type III acyl coenzyme A transferase                       | Mediates the cleavage of DMSP forming DMS and a 3-carbon compound                                                                                                                                                  |
| <i>dddQ</i> | DMSP lyase                                                 | Mediates the cleavage of DMSP forming DMS and a 3-carbon compound                                                                                                                                                  |
| <i>dmdA</i> | DMSP demethylase                                           | Catalyzes the first step in the DMSP demethylation pathway - cleavage of a methyl group from DMSP, eventually resulting in methionine formation and C oxidation                                                    |
| <i>soxA</i> | Cytochrome c (diheme)                                      | One of the seven structural proteins involved in sulfur oxidation it combines with the SoxX protein form a cytochrome c complex that is located in the periplasm of the cell and is involved in electron transport |
| <i>soxB</i> | Sulfate thiohydrolase                                      | One of the seven structural proteins involved in sulfur oxidation it is a type of cytochrome c protein that is located in the periplasm and is involved in the electron transport chain                            |
| <i>fliC</i> | Filament protein; flagellin                                | Structural filament protein, synthesized in the cytosol, composed of monomeric subunits that are polymerized into the long helical filament of the bacterial flagellum                                             |
| <i>fliF</i> | MS-ring protein                                            | Transmembrane flagellar MS-ring protein, part of the flagellar basal body, that anchors the flagellum to the cytoplasmic membrane                                                                                  |
| <i>fliG</i> | Flagellar motor switch protein                             | Essential for assembly, rotation and clockwise/counter-clockwise switching of the bacterial flagellum                                                                                                              |
| <i>motA</i> | Flagellar motor protein                                    | Along with MotB couples flagellar rotation to proton/sodium motive force across the membrane and forms the stator elements of the rotary flagellar machine, required for flagellar rotation                        |
| <i>motB</i> | Flagellar motor protein                                    | Along with MotA couples flagellar rotation to proton/sodium motive force across the membrane and forms the stator elements of the rotary flagellar machine, required for flagellar rotation                        |
| <i>cheA</i> | Histidine kinase                                           | A cytoplasmic histidine kinase that donates phosphate groups to                                                                                                                                                    |

|                            |                                                                      |                                                                                                                                                                                                                                                                                                     |
|----------------------------|----------------------------------------------------------------------|-----------------------------------------------------------------------------------------------------------------------------------------------------------------------------------------------------------------------------------------------------------------------------------------------------|
|                            |                                                                      | CheY and CheB, which control flagellar responses and sensory adaptation, respectively                                                                                                                                                                                                               |
| <i>cheB</i>                | Methylesterase                                                       | A phosphorylation-activated response regulator involved in reversible modification of bacterial chemotaxis receptors. It is required for tumbling movement and regulates tumbling frequency based on perceived tumble-modulating signals (i.e. nutrient concentration) formed by the chemoreceptors |
| <i>cheR</i>                | Methyltransferase                                                    | Involved in reversible modification of bacterial chemotaxis receptors, it plays a role in the chemosensory response and adaptation of the cell to chemical stimuli                                                                                                                                  |
| <i>cheW</i>                | Signaling protein                                                    | Plays a role in coupling methyl-accepting chemotaxis proteins, it regulates motility behavior by two distinct signals, one that stimulates and one that inhibits the intracellular phosphorylation cascade by its effect on the histidine kinase CheA                                               |
| <i>thiC</i>                | Phosphomethylpyrimidine synthase                                     | Catalyzes the pyrimidine branch of the Thiamin biosynthesis pathway, converting 5-aminoimidazole ribonucleotide to hydroxymethylpyrimidine phosphate                                                                                                                                                |
| <i>thiL</i>                | Thiamin-monophosphate kinase                                         | Catalyzes the final step of the thiamin pyrophosphate biosynthesis pathway                                                                                                                                                                                                                          |
| <i>pdxH</i>                | Pyridoxine 5'-phosphate oxidase                                      | Catalyzes the oxidation of pyridoxine 5'-phosphate to pyridoxal 5'-phosphate in the final step of vitamin B6 biosynthesis                                                                                                                                                                           |
| <i>pdxJ</i>                | Pyridoxine 5'-phosphate synthase                                     | Catalyzes the condensation of 1-deoxy-d-xylulose-5-phosphate and 1-amino-3-oxo-4-(phosphohydroxy)propan-2-one to pyridoxine 5'-phosphate, a reaction involved in de novo biosynthesis of pyridoxine (vitamin B6) and pyridoxal phosphate                                                            |
| <i>fecA</i>                | Ferric dicitrate transporter                                         | TonB-ExbB-dependent ferric-siderophore specific outer membrane receptor protein. When intracellular iron is low, exogenous ferric citrate binds to the FecA receptor, which signals for and aids in translocation of ferric citrate into the cell                                                   |
| <i>feoB</i>                | Fe(II) G protein-like transporter                                    | Membrane-bound G protein-like transporter, essential for Fe(II) uptake in bacteria during conditions of low oxygen                                                                                                                                                                                  |
| <i>Ftr1</i>                | High affinity Fe(II) permease                                        | Permease component of a high-affinity Fe(II) uptake system. Expression may be increased during Fe limitation                                                                                                                                                                                        |
| <i>afuA/futA/hitA/diaA</i> | Periplasmic Fe(III) ABC transporter                                  | Iron-deficiency-induced, periplasmic iron-binding protein component of a ferric iron ABC-transporter system                                                                                                                                                                                         |
| <i>afuB/futB</i>           | Fe(III) ABC transporter permease                                     | Hydrophobic ferric iron ABC transporter permease protein                                                                                                                                                                                                                                            |
| PR                         | Proteorhodopsin                                                      | Mediates light-driven proton pumps for harvesting and conversion of light into energy                                                                                                                                                                                                               |
| <i>bchX</i>                | Chlorophyll iron protein                                             | Part of a photosynthetic gene cluster involved in redox reactions of the bacteriochlorophyll biosynthesis pathway                                                                                                                                                                                   |
| <i>pufL</i>                | Photosynthetic reaction center subunit L                             | The light subunit of the photosynthetic reaction center, it helps provide the scaffolding for the chromophore in the reaction center                                                                                                                                                                |
| <i>pufM</i>                | Photosynthetic reaction center subunit M                             | The medium subunit of the photosynthetic reaction center, it helps provide the scaffolding for the chromophore in the reaction center                                                                                                                                                               |
| <i>psbB</i>                | Photosystem II CP47 chlorophyll apoprotein                           | Photosystem II protein that binds to chlorophyll and is found in plants, algae, and cyanobacteria                                                                                                                                                                                                   |
| <i>cpcD</i>                | Phycocyanin-assoc. linker polypeptide                                | Structural component of the phycobilisome                                                                                                                                                                                                                                                           |
| $\alpha$ - <i>ca</i>       | $\alpha$ carbonic anhydrase                                          | Zinc metalloenzyme found in bacteria, archaea, and eukaryota that participates in CO <sub>2</sub> diffusion, interconversion of CO <sub>2</sub> and HCO <sub>3</sub> during photosynthesis, pH homeostasis, and ion transport                                                                       |
| $\epsilon$ - <i>ca</i>     | $\epsilon$ carbonic anhydrase                                        | Zinc metalloenzyme found in cyanobacteria carboxysomes and chemolithoautotrophs that participates in CO <sub>2</sub> diffusion, interconversion of CO <sub>2</sub> and HCO <sub>3</sub> during photosynthesis, pH homeostasis, and ion transport                                                    |
| <i>rbcL</i> (IA)           | Ribulose 1,5-bisphosphate carboxylase/oxygenase form IA (RuBisCO IA) | Catalyzes the first, rate-limiting step of the Calvin cycle, the primary pathway for photosynthetic carbon reduction in the oceans; <i>rbcL</i> IA has been found in $\alpha$ , $\beta$ , and $\gamma$ -proteobacteria, cyanobacteria and prochlorales                                              |
| <i>rbcL</i> (II)           | Ribulose 1,5-bisphosphate carboxylase/oxygenase form II (RuBisCO II) | Catalyzes the first, rate-limiting step of the Calvin cycle, the primary pathway for photosynthetic carbon reduction in the oceans; <i>rbcL</i> II has been found in $\alpha$ , $\beta$ , and $\gamma$ -proteobacteria, and eukaryotes                                                              |



Table S3. Gene expression ratios in the *Synechococcus* sp. CB0205 bin.

| NCBI GI   | Protein Description                                      | Mean Expression Ratio (FL) | Mean Expression Ratio (PA) | PA Regulation |
|-----------|----------------------------------------------------------|----------------------------|----------------------------|---------------|
| 497998808 | hypothetical protein SCB02_00319                         | 0.0159                     | 0.0511                     | Up            |
| 497998935 | hypothetical protein SCB02_00599                         | 0.0039                     | 0.016                      | Up            |
| 497999395 | hypothetical protein SCB02_01633                         | 0.0223                     | 0.1099                     | Up            |
| 497999396 | hypothetical protein SCB02_01638                         | 0.0421                     | 0.1981                     | Up            |
| 498000149 | tRNA nucleotidyltransferase/poly(A) polymerase           | 0.014                      | 0.0326                     | Up            |
| 498000159 | glycosyltransferase                                      | 0.002                      | 0.011                      | Up            |
| 498000180 | hypothetical protein SCB02_03348                         | 0.0304                     | 0.1832                     | Up            |
| 498000306 | queuine tRNA-ribosyltransferase                          | 0.0105                     | 0.0296                     | Up            |
| 498000620 | hypothetical protein SCB02_04388                         | 0.0309                     | 0.051                      | Up            |
| 498000622 | dihydrobiliverdin:ferredoxin oxidoreductase              | 0.0305                     | 0.072                      | Up            |
| 498000774 | NAD(P)H-quinone oxidoreductase subunit N                 | 0.0103                     | 0.0485                     | Up            |
| 498000927 | putative enolase-phosphatase E-1                         | 0.0086                     | 0.0233                     | Up            |
| 498001071 | hypothetical protein SCB02_05303                         | 0.3047                     | 0.7016                     | Up            |
| 498001275 | outer envelope membrane protein                          | 0.0193                     | 0.0296                     | Up            |
| 498001991 | hypothetical protein SCB02_07563                         | 0.0106                     | 0.0325                     | Up            |
| 498002581 | sugar kinase                                             | 0.0242                     | 0.0526                     | Up            |
| 498002588 | hypothetical protein SCB02_09140                         | 0.0031                     | 0.0116                     | Up            |
| 498002720 | serine:pyruvate/alanine:glyoxylate aminotransferase      | 0.1162                     | 0.2943                     | Up            |
| 498002799 | thioredoxin peroxidase                                   | 0.0792                     | 0.2075                     | Up            |
| 498003008 | hypothetical protein SCB02_10519                         | 0.0041                     | 0.0404                     | Up            |
| 498003662 | alpha-glucosidase                                        | 0.01                       | 0.0388                     | Up            |
| 498003678 | superfamily II DNA/RNA helicase                          | 0.0876                     | 0.1566                     | Up            |
| 498003936 | putative L-cysteine/cystine lyase                        | 0.023                      | 0.0477                     | Up            |
| 497992572 | hypothetical protein SCB02_00062                         | 0.0039                     | 0.0015                     | Down          |
| 497998706 | protein phosphatase 2C                                   | 0.0088                     | 0.003                      | Down          |
| 497998744 | 30S ribosomal protein S14                                | 0.0903                     | 0.0132                     | Down          |
| 497998754 | polynucleotide phosphorylase/polyadenylase               | 0.017                      | 0.0051                     | Down          |
| 497998755 | hypothetical protein SCB02_00354                         | 0.0159                     | 0.0056                     | Down          |
| 497998831 | hypothetical protein SCB02_00369                         | 0.01                       | 0.0031                     | Down          |
| 497998836 | methionine sulfoxide reductase B                         | 0.0263                     | 0.0072                     | Down          |
| 497998838 | putative lipidA disaccharide synthetase                  | 0.0134                     | 0.0035                     | Down          |
| 497998840 | acetyl-CoA carboxylase biotin carboxylase subunit        | 0.0127                     | 0.0033                     | Down          |
| 497998842 | hypothetical protein SCB02_00389                         | 0.0148                     | 0.004                      | Down          |
| 497998855 | ATPase                                                   | 0.0201                     | 0.0099                     | Down          |
| 497998861 | FeS assembly ATPase SufC                                 | 0.0196                     | 0.0059                     | Down          |
| 497998888 | ferredoxin-thioredoxin reductase catalytic chain         | 0.0203                     | 0.0088                     | Down          |
| 497998890 | transcriptional regulator                                | 0.0176                     | 0.0046                     | Down          |
| 497998893 | phycobilisome rod-core linker polypeptide cpcG           | 0.0612                     | 0.0169                     | Down          |
| 497998906 | Rho termination factor domain-containing protein         | 0.0246                     | 0.0088                     | Down          |
| 497998908 | hypothetical protein SCB02_00569                         | 0.0138                     | 0.0034                     | Down          |
| 497998918 | peroxiredoxin                                            | 0.0076                     | 0.0024                     | Down          |
| 497998942 | peroxiredoxin                                            | 0.0386                     | 0.0167                     | Down          |
| 497998956 | periplasmic trypsin-like serine protease                 | 0.0301                     | 0.0048                     | Down          |
| 497998977 | RND family outer membrane efflux protein                 | 0.0109                     | 0.0049                     | Down          |
| 497999018 | photosystem II complex extrinsic protein precursor U     | 0.0269                     | 0.0168                     | Down          |
| 497999025 | hypothetical protein SCB02_00786                         | 0.0503                     | 0.0175                     | Down          |
| 497999029 | 2-methylthioadenine synthetase                           | 0.0049                     | 0.0022                     | Down          |
| 497999031 | major facilitator superfamily permease                   | 0.0084                     | 0.002                      | Down          |
| 497999034 | Fe-S oxidoreductase                                      | 0.0108                     | 0.0068                     | Down          |
| 497999038 | 6-pyruvoyl tetrahydropterin synthase                     | 0.0231                     | 0.0053                     | Down          |
| 497999047 | zeta-carotene desaturase                                 | 0.0166                     | 0.0058                     | Down          |
| 497999080 | porin                                                    | 0.0277                     | 0.0136                     | Down          |
| 497999098 | porin                                                    | 0.0505                     | 0.0211                     | Down          |
| 497999102 | glycosyl transferase family protein                      | 0.0045                     | 0.0015                     | Down          |
| 497999105 | glycosyltransferase                                      | 0.0069                     | 0.0034                     | Down          |
| 497999112 | hypothetical protein SCB02_00966                         | 0.0083                     | 0.0024                     | Down          |
| 497999113 | photosystem II D2 protein (photosystem q(a) protein)     | 0.043                      | 0.0195                     | Down          |
| 497999117 | copper-transporting ATPase                               | 0.006                      | 0.0015                     | Down          |
| 497999144 | RNA-binding protein                                      | 0.0412                     | 0.0168                     | Down          |
| 497999166 | phytoene synthase                                        | 0.0186                     | 0.0041                     | Down          |
| 497999169 | phytoene dehydrogenase                                   | 0.0156                     | 0.0019                     | Down          |
| 497999172 | NAD(P)H-quinone oxidoreductase subunit F                 | 0.0383                     | 0.0084                     | Down          |
| 497999182 | NAD(P)H-quinone oxidoreductase subunit 4                 | 0.0112                     | 0.004                      | Down          |
| 497999184 | nucleoside-diphosphate-sugar transferase                 | 0.0206                     | 0.0069                     | Down          |
| 497999190 | methylenetetrahydrofolate reductase                      | 0.0107                     | 0.0023                     | Down          |
| 497999193 | NADH:ubiquinone oxidoreductase subunit J                 | 0.0489                     | 0.0082                     | Down          |
| 497999206 | NADH:ubiquinone oxidoreductase subunit H                 | 0.0332                     | 0.0109                     | Down          |
| 497999210 | citrate synthase                                         | 0.0112                     | 0.0031                     | Down          |
| 497999212 | NAD(P)H-quinone oxidoreductase subunit H                 | 0.0214                     | 0.0076                     | Down          |
| 497999253 | TM2 domain-containing protein                            | 0.0062                     | 0.0027                     | Down          |
| 497999262 | glutathione synthetase                                   | 0.0128                     | 0.0022                     | Down          |
| 497999283 | arginyl-tRNA synthetase                                  | 0.0114                     | 0.0016                     | Down          |
| 497999304 | guanosine-3',5'-bis(diphosphate) 3'-pyrophosphohydrolase | 0.0126                     | 0.0047                     | Down          |
| 497999312 | two-component response regulator                         | 0.0068                     | 0.002                      | Down          |
| 497999338 | 50S ribosomal protein L10                                | 0.0666                     | 0.0183                     | Down          |
| 497999369 | 50S ribosomal protein L1                                 | 0.0394                     | 0.0072                     | Down          |
| 497999371 | 50S ribosomal protein L11                                | 0.1236                     | 0.0245                     | Down          |
| 497999373 | transcription antitermination protein NusG               | 0.0385                     | 0.0065                     | Down          |
| 497999374 | putative kinase                                          | 0.0075                     | 0.0034                     | Down          |
| 497999379 | aspartyl/glutamyl-tRNA amidotransferase subunit B        | 0.0091                     | 0.002                      | Down          |
| 497999386 | arginine decarboxylase                                   | 0.0041                     | 0.0022                     | Down          |
| 497999391 | putative flavoprotein                                    | 0.01                       | 0.0023                     | Down          |
| 497999419 | hypothetical protein SCB02_01718                         | 0.2035                     | 0.0677                     | Down          |
| 497999425 | glycine dehydrogenase                                    | 0.0111                     | 0.0018                     | Down          |
| 497999427 | glycine cleavage system protein H                        | 0.0104                     | 0.0037                     | Down          |
| 497999429 | 50S ribosomal protein L9                                 | 0.0245                     | 0.0053                     | Down          |
| 497999439 | DnaB replicative helicase                                | 0.0076                     | 0.003                      | Down          |
| 497999442 | putative membrane protein of ABC transport system        | 0.012                      | 0.0023                     | Down          |

|           |                                                                                               |        |        |      |
|-----------|-----------------------------------------------------------------------------------------------|--------|--------|------|
| 497999576 | putative urea ABC transporter, substrate binding protein                                      | 0.0335 | 0.0057 | Down |
| 497999578 | hypothetical protein SCB02_02052                                                              | 0.0503 | 0.0038 | Down |
| 497999603 | uroporphyrin-III c-methyltransferase                                                          | 0.0259 | 0.0022 | Down |
| 497999605 | ferredoxin-nitrite reductase                                                                  | 0.025  | 0.0084 | Down |
| 497999612 | formate and nitrite transporters                                                              | 0.0995 | 0.0158 | Down |
| 497999614 | hypothetical protein SCB02_02092                                                              | 0.0153 | 0.0051 | Down |
| 497999620 | assimilatory nitrate reductase (ferredoxin) precursor                                         | 0.0065 | 0.0017 | Down |
| 497999627 | nitrate permease NapA                                                                         | 0.0123 | 0.0016 | Down |
| 497999629 | major facilitator superfamily permease                                                        | 0.0041 | 0.0013 | Down |
| 497999648 | polyphosphate kinase                                                                          | 0.0025 | 0.0008 | Down |
| 497999650 | formyltetrahydrofolate deformylase                                                            | 0.0104 | 0.0027 | Down |
| 497999669 | molecular chaperone DnaK                                                                      | 0.0127 | 0.0024 | Down |
| 497999678 | argininosuccinate synthase                                                                    | 0.0205 | 0.0016 | Down |
| 497999690 | excinuclease ABC subunit B                                                                    | 0.0057 | 0.0009 | Down |
| 497999730 | trigger factor                                                                                | 0.0084 | 0.0028 | Down |
| 497999746 | ATP-dependent Clp protease proteolytic subunit ClpP                                           | 0.0117 | 0.003  | Down |
| 497999748 | glycosyl transferase, group 2 family protein                                                  | 0.0246 | 0.0057 | Down |
| 497999757 | sulfolipid biosynthesis protein (UDP-sulfoquinovose synthase)                                 | 0.0458 | 0.0071 | Down |
| 497999772 | putative penicillin-binding protein                                                           | 0.0038 | 0.001  | Down |
| 497999776 | GMP synthase                                                                                  | 0.0286 | 0.0025 | Down |
| 497999781 | elongation factor P                                                                           | 0.0301 | 0.0065 | Down |
| 497999813 | putative cyclophilin-type peptidyl-prolyl cis-trans isomerase                                 | 0.0071 | 0.0033 | Down |
| 497999815 | glyceraldehyde 3-phosphate dehydrogenase                                                      | 0.0422 | 0.0112 | Down |
| 497999820 | UDP-N-acetylmuramate--L-alanine ligase                                                        | 0.0072 | 0.0013 | Down |
| 497999822 | chaperone protein DnaJ                                                                        | 0.0079 | 0.002  | Down |
| 497999832 | Na+/H+ antiporter                                                                             | 0.0418 | 0.0114 | Down |
| 497999848 | phosphorylase                                                                                 | 0.008  | 0.0041 | Down |
| 497999852 | acyl carrier protein                                                                          | 0.0217 | 0.0066 | Down |
| 497999932 | 3-oxoacyl-acyl-carrier-protein] synthase II                                                   | 0.0706 | 0.01   | Down |
| 497999934 | transketolase                                                                                 | 0.0321 | 0.0041 | Down |
| 497999936 | thiamine biosynthesis protein ThiC                                                            | 0.0232 | 0.014  | Down |
| 497999938 | hypothetical protein SCB02_02826                                                              | 0.0233 | 0.0053 | Down |
| 497999940 | cysteine synthase A                                                                           | 0.0081 | 0.0018 | Down |
| 497999957 | lysyl-tRNA synthetase                                                                         | 0.0068 | 0.0011 | Down |
| 497999971 | signal recognition particle-docking protein FtsY                                              | 0.0118 | 0.0031 | Down |
| 497999977 | hypothetical protein SCB02_02916                                                              | 0.0352 | 0.0082 | Down |
| 497999980 | hypothetical protein SCB02_02921                                                              | 0.0167 | 0.0031 | Down |
| 497999982 | DNA gyrase/topoisomerase IV, subunit A                                                        | 0.0065 | 0.0024 | Down |
| 497999988 | excinuclease ABC subunit A                                                                    | 0.0066 | 0.0022 | Down |
| 497999990 | DNA repair ATPase RecN                                                                        | 0.0043 | 0.0013 | Down |
| 497999992 | DNA polymerase III subunit beta                                                               | 0.0067 | 0.004  | Down |
| 498000001 | phosphoribosylformylglycinamide synthase II                                                   | 0.0169 | 0.0051 | Down |
| 498000004 | amidophosphoribosyltransferase                                                                | 0.0207 | 0.0061 | Down |
| 498000007 | photosystem II reaction center protein Z                                                      | 0.0449 | 0.0142 | Down |
| 498000019 | preprotein translocase subunit SecA                                                           | 0.011  | 0.0038 | Down |
| 498000035 | Mg2+ transporter                                                                              | 0.0113 | 0.0058 | Down |
| 498000058 | S-adenosyl-L-homocysteine hydrolase                                                           | 0.0151 | 0.0022 | Down |
| 498000087 | rod shape-determining protein MreB                                                            | 0.0051 | 0.0018 | Down |
| 498000093 | argininosuccinate lyase                                                                       | 0.0092 | 0.0023 | Down |
| 498000103 | hypothetical protein SCB02_03193                                                              | 0.013  | 0.0023 | Down |
| 498000109 | glycosyl transferase family protein                                                           | 0.0089 | 0.0031 | Down |
| 498000114 | amino acid permease-associated region                                                         | 0.0086 | 0.002  | Down |
| 498000123 | carbamoyltransferase                                                                          | 0.0127 | 0.0045 | Down |
| 498000128 | hypothetical protein SCB02_03238                                                              | 0.021  | 0.0032 | Down |
| 498000131 | isocitrate dehydrogenase                                                                      | 0.0175 | 0.0049 | Down |
| 498000135 | Heme oxygenase (deacylizing)                                                                  | 0.0505 | 0.0226 | Down |
| 498000140 | glycosyl transferase family protein                                                           | 0.0181 | 0.0081 | Down |
| 498000142 | ABC-type multidrug transport system, ATPase and permease components                           | 0.0154 | 0.0067 | Down |
| 498000145 | glycosyltransferase                                                                           | 0.0087 | 0.0039 | Down |
| 498000172 | hypothetical protein SCB02_03393                                                              | 0.008  | 0.0033 | Down |
| 498000199 | hypothetical protein SCB02_03418                                                              | 0.013  | 0.0035 | Down |
| 498000210 | GDP-mannose 4,6-dehydratase                                                                   | 0.0129 | 0.0051 | Down |
| 498000212 | dTDP-glucose 4-6-dehydratase-like protein                                                     | 0.0233 | 0.006  | Down |
| 498000216 | UDP-glucose 6-dehydrogenase                                                                   | 0.0087 | 0.0021 | Down |
| 498000219 | photosystem II reaction center protein J                                                      | 0.0666 | 0.0133 | Down |
| 498000221 | photosystem II reaction center L                                                              | 0.0997 | 0.0101 | Down |
| 498000224 | cytochrome b559 subunit beta                                                                  | 0.0402 | 0.0162 | Down |
| 498000226 | Ycf48-like protein                                                                            | 0.0214 | 0.0113 | Down |
| 498000229 | rubredoxin                                                                                    | 0.0167 | 0.0039 | Down |
| 498000231 | NADH:ubiquinone oxidoreductase subunit A                                                      | 0.0319 | 0.0051 | Down |
| 498000233 | NADH dehydrogenase subunit B                                                                  | 0.052  | 0.007  | Down |
| 498000235 | magnesium chelatase, ATPase subunit D                                                         | 0.0063 | 0.0024 | Down |
| 498000249 | DegT/DnrJ/EryC1/StrS aminotransferase family protein                                          | 0.0085 | 0.0025 | Down |
| 498000257 | imidazoleglycerol-phosphate dehydratase                                                       | 0.014  | 0.0044 | Down |
| 498000269 | lignostilbene-alpha,beta-dioxygenase and related enzyme                                       | 0.004  | 0.0016 | Down |
| 498000271 | hypothetical protein SCB02_03573                                                              | 0.0178 | 0.0048 | Down |
| 498000276 | phosphoglucomutase/phosphomannomutase family protein                                          | 0.0079 | 0.0025 | Down |
| 498000281 | hypothetical protein SCB02_03653                                                              | 0.174  | 0.0597 | Down |
| 498000312 | hypothetical protein SCB02_03668                                                              | 0.0267 | 0.0095 | Down |
| 498000316 | 4-hydroxy-3-methylbut-2-enyl diphosphate reductase                                            | 0.01   | 0.0017 | Down |
| 498000318 | serine hydroxymethyltransferase                                                               | 0.0134 | 0.0032 | Down |
| 498000325 | glycosyltransferase                                                                           | 0.0099 | 0.004  | Down |
| 498000326 | isopropylmalate isomerase large subunit                                                       | 0.0177 | 0.0038 | Down |
| 498000328 | alpha mannosidase                                                                             | 0.0053 | 0.0028 | Down |
| 498000331 | Sec-independent protein translocase protein Tata                                              | 0.0601 | 0.0215 | Down |
| 498000334 | hypothetical protein SCB02_03788                                                              | 0.0051 | 0.0021 | Down |
| 498000338 | CRP family global nitrogen regulatory protein                                                 | 0.0131 | 0.0032 | Down |
| 498000341 | putative inorganic carbon transporter/0-antigen polymerase (ICT/OAP) family protein           | 0.0051 | 0.0018 | Down |
| 498000366 | hypothetical protein SCB02_03863                                                              | 0.019  | 0.0099 | Down |
| 498000372 | beta carotene hydroxylase                                                                     | 0.0176 | 0.0037 | Down |
| 498000381 | coenzyme A biosynthesis bifunctional protein CoaBC (DNA/pantothenate metabolism flavoprotein) | 0.0101 | 0.0026 | Down |
| 498000401 | photosystem II manganese-stabilizing protein                                                  | 0.034  | 0.0091 | Down |
| 498000406 | Sulfate adenylyltransferase                                                                   | 0.031  | 0.0083 | Down |

|           |                                                                               |        |        |      |
|-----------|-------------------------------------------------------------------------------|--------|--------|------|
| 498000408 | cell division protein FtsH                                                    | 0.033  | 0.0085 | Down |
| 498000410 | chorismate synthase                                                           | 0.0192 | 0.0038 | Down |
| 498000415 | Fe-S oxidoreductase                                                           | 0.0115 | 0.0049 | Down |
| 498000432 | ATP-dependent Clp protease adaptor protein ClpS                               | 0.0168 | 0.0034 | Down |
| 498000435 | L,L-diaminopimelate aminotransferase                                          | 0.0065 | 0.0014 | Down |
| 498000437 | ribonucleases G and E                                                         | 0.0254 | 0.0032 | Down |
| 498000443 | cyclopropane-fatty-acyl-phospholipid synthase family protein                  | 0.013  | 0.0023 | Down |
| 498000460 | Lon protease domain-containing protein                                        | 0.0238 | 0.0049 | Down |
| 498000463 | elongation factor Tu                                                          | 0.1445 | 0.0376 | Down |
| 498000466 | elongation factor G                                                           | 0.1601 | 0.0211 | Down |
| 498000468 | 30S ribosomal protein S7                                                      | 0.0486 | 0.0057 | Down |
| 498000472 | hypothetical protein SCB02_04086                                              | 0.004  | 0.002  | Down |
| 498000478 | ferredoxin-dependent glutamate synthase                                       | 0.0243 | 0.0041 | Down |
| 498000481 | lipoyl synthase                                                               | 0.0097 | 0.0048 | Down |
| 498000485 | photosystem I P700 chlorophyll a apoprotein A1                                | 0.0941 | 0.0518 | Down |
| 498000493 | photosystem I P700 chlorophyll a apoprotein A1                                | 0.1211 | 0.0508 | Down |
| 498000503 | photosystem I P700 chlorophyll a apoprotein A2                                | 0.0839 | 0.0468 | Down |
| 498000505 | universal stress protein                                                      | 0.0212 | 0.0116 | Down |
| 498000517 | photosystem II PsbB protein                                                   | 0.1362 | 0.0488 | Down |
| 498000524 | 30S ribosomal protein S1                                                      | 0.0674 | 0.0091 | Down |
| 498000533 | S-adenosylmethionine synthetase                                               | 0.0191 | 0.0053 | Down |
| 498000537 | phycobilisome rod-core linker polypeptide (L-RC 28.5)                         | 0.0741 | 0.0141 | Down |
| 498000559 | hypothetical protein SCB02_04258                                              | 0.062  | 0.0092 | Down |
| 498000561 | phycobilisome linker polypeptide, C-phycocerythrin class I-associated protein | 0.0557 | 0.0101 | Down |
| 498000563 | phycobilisome linker polypeptide, C-phycocerythrin-associated protein         | 0.0309 | 0.0048 | Down |
| 498000565 | phycobilisome linker polypeptide, C-phycocerythrin class I-associated protein | 0.044  | 0.0072 | Down |
| 498000567 | phycocerythrin linker gene region                                             | 0.0043 | 0.0016 | Down |
| 498000574 | hypothetical protein SCB02_04318                                              | 0.0059 | 0.0014 | Down |
| 498000587 | bilin biosynthesis protein CpeZ                                               | 0.013  | 0.0016 | Down |
| 498000609 | C-phycocerythrin class I alpha chain                                          | 0.31   | 0.1243 | Down |
| 498000613 | C-phycocerythrin class I beta chain                                           | 0.3171 | 0.0625 | Down |
| 498000615 | phycocerythrobilin:ferredoxin oxidoreductase                                  | 0.0109 | 0.0016 | Down |
| 498000624 | R-phycocyanin II beta chain                                                   | 0.0537 | 0.0154 | Down |
| 498000633 | phycocyanin, alpha subunit                                                    | 0.1074 | 0.0657 | Down |
| 498000635 | HEAT repeat-containing PBS lyase                                              | 0.0096 | 0.0028 | Down |
| 498000638 | phosphoribosylaminoimidazole synthetase                                       | 0.0229 | 0.003  | Down |
| 498000647 | hypothetical protein SCB02_04445                                              | 0.0253 | 0.0095 | Down |
| 498000650 | hypothetical protein SCB02_04525                                              | 0.0182 | 0.0074 | Down |
| 498000693 | cell division protein                                                         | 0.0119 | 0.0067 | Down |
| 498000702 | photosystem I protein PsaD                                                    | 0.0802 | 0.0258 | Down |
| 498000704 | anthranilate synthase component I                                             | 0.0099 | 0.0018 | Down |
| 498000705 | phosphoenolpyruvate carboxylase                                               | 0.0129 | 0.0017 | Down |
| 498000707 | hypothetical protein SCB02_04605                                              | 0.0124 | 0.0053 | Down |
| 498000716 | hypothetical protein SCB02_04620                                              | 0.0277 | 0.0083 | Down |
| 498000722 | hypothetical protein SCB02_04659                                              | 0.0374 | 0.0149 | Down |
| 498000753 | recombinase A                                                                 | 0.0077 | 0.003  | Down |
| 498000756 | 50S ribosomal protein L3                                                      | 0.1743 | 0.0191 | Down |
| 498000776 | 30S ribosomal protein S3                                                      | 0.0864 | 0.012  | Down |
| 498000787 | 50S ribosomal protein L29                                                     | 0.0987 | 0.0277 | Down |
| 498000790 | 50S ribosomal protein L5                                                      | 0.0403 | 0.0066 | Down |
| 498000796 | 30S ribosomal protein S8                                                      | 0.0558 | 0.0161 | Down |
| 498000798 | 50S ribosomal protein L6                                                      | 0.1213 | 0.0128 | Down |
| 498000800 | 50S ribosomal protein L15                                                     | 0.0536 | 0.0228 | Down |
| 498000808 | preprotein translocase subunit SecY                                           | 0.0331 | 0.0075 | Down |
| 498000812 | adenylate kinase                                                              | 0.0279 | 0.004  | Down |
| 498000814 | 30S ribosomal protein S13                                                     | 0.1065 | 0.0301 | Down |
| 498000833 | DNA-directed RNA polymerase subunit alpha                                     | 0.0368 | 0.0069 | Down |
| 498000837 | 50S ribosomal protein L13                                                     | 0.0908 | 0.0204 | Down |
| 498000842 | 30S ribosomal protein S9                                                      | 0.0752 | 0.0099 | Down |
| 498000843 | alanine racemase                                                              | 0.0069 | 0.0028 | Down |
| 498000854 | photosystem I reaction centre subunit XI                                      | 0.0653 | 0.0091 | Down |
| 498000870 | carboxyl-terminal protease                                                    | 0.0043 | 0.0012 | Down |
| 498000907 | cytochrome b6                                                                 | 0.0625 | 0.0259 | Down |
| 498000909 | cytochrome b6-f complex subunit IV                                            | 0.0792 | 0.0509 | Down |
| 498000911 | Calcium/calmodulin dependent protein kinase II association-domain protein     | 0.0041 | 0.0016 | Down |
| 498000925 | photosystem I reaction center subunit IV                                      | 0.0448 | 0.0171 | Down |
| 498000931 | cell division protein sepF                                                    | 0.0347 | 0.0116 | Down |
| 498000980 | putative transporter, membrane component                                      | 0.0065 | 0.002  | Down |
| 498000989 | GPH family sugar transporter                                                  | 0.0095 | 0.0021 | Down |
| 498000991 | DNA-binding protein HU                                                        | 0.042  | 0.0161 | Down |
| 498001008 | iron ABC transporter ATP-binding protein                                      | 0.0044 | 0.0019 | Down |
| 498001020 | GTPase CgtA                                                                   | 0.0075 | 0.0035 | Down |
| 498001022 | translation initiation factor IF-2                                            | 0.0226 | 0.0066 | Down |
| 498001058 | trypsin-like serine protease                                                  | 0.0207 | 0.0082 | Down |
| 498001079 | ribose-5-phosphate isomerase A                                                | 0.0363 | 0.0037 | Down |
| 498001081 | DNA-directed RNA polymerase subunit beta                                      | 0.0417 | 0.0059 | Down |
| 498001088 | DNA-directed RNA polymerase subunit gamma                                     | 0.0263 | 0.0051 | Down |
| 498001089 | DNA-directed RNA polymerase subunit beta'                                     | 0.0316 | 0.0074 | Down |
| 498001091 | ribosomal RNA large subunit methyltransferase N                               | 0.0199 | 0.0038 | Down |
| 498001095 | hypothetical protein SCB02_05393                                              | 0.0472 | 0.0186 | Down |
| 498001101 | hypothetical protein SCB02_05398                                              | 0.06   | 0.0101 | Down |
| 498001103 | DEAD/DEAH box helicase-like protein                                           | 0.0067 | 0.0029 | Down |
| 498001126 | adenylosuccinate lyase                                                        | 0.0107 | 0.004  | Down |
| 498001131 | nitrogen regulatory protein P-II                                              | 0.0297 | 0.0108 | Down |
| 498001137 | phycobilisome linker polypeptide, allophycocyanin-associated, core (LC 7.7)   | 0.0536 | 0.0136 | Down |
| 498001147 | allophycocyanin subunit beta                                                  | 0.0653 | 0.025  | Down |
| 498001150 | allophycocyanin alpha chain                                                   | 0.2001 | 0.0351 | Down |
| 498001152 | anchor polypeptide LCM                                                        | 0.0408 | 0.0083 | Down |
| 498001154 | H+-transporting ATP synthase                                                  | 0.3173 | 0.0461 | Down |
| 498001158 | F0F1 ATP synthase subunit A                                                   | 0.1588 | 0.0272 | Down |
| 498001160 | F0F1 ATP synthase subunit B'                                                  | 0.0835 | 0.0131 | Down |
| 498001164 | F0F1 ATP synthase subunit B                                                   | 0.0473 | 0.0085 | Down |
| 498001165 | F0F1 ATP synthase subunit alpha                                               | 0.0547 | 0.0162 | Down |
| 498001167 | F0F1 ATP synthase subunit epsilon                                             | 0.0341 | 0.0088 | Down |

|           |                                                                                           |        |        |      |
|-----------|-------------------------------------------------------------------------------------------|--------|--------|------|
| 498001203 | F0F1 ATP synthase subunit beta                                                            | 0.0551 | 0.0099 | Down |
| 498001204 | chaperonin GroEL                                                                          | 0.0131 | 0.003  | Down |
| 498001206 | phosphoglyceromutase                                                                      | 0.0152 | 0.0054 | Down |
| 498001212 | hypothetical protein SCB02_05778                                                          | 0.0089 | 0.004  | Down |
| 498001232 | hypothetical protein SCB02_05853                                                          | 0.0071 | 0.0032 | Down |
| 498001258 | 50S ribosomal protein L21                                                                 | 0.0617 | 0.0124 | Down |
| 498001260 | phosphoribosylamine--glycine ligase                                                       | 0.0066 | 0.0033 | Down |
| 498001271 | UDP-3-O-3-hydroxymyristoyl] N-acetylglucosamine deacetylase                               | 0.0117 | 0.0018 | Down |
| 498001277 | (3R)-hydroxymyristoyl-ACP dehydratase                                                     | 0.0336 | 0.0086 | Down |
| 498001279 | peptide methionine sulfoxide reductase MsrA                                               | 0.0083 | 0.0017 | Down |
| 498001285 | hypothetical protein SCB02_05933                                                          | 0.0151 | 0.0052 | Down |
| 498001287 | multifunctional aminopeptidase A                                                          | 0.0077 | 0.0027 | Down |
| 498001291 | tyrosyl-tRNA synthetase                                                                   | 0.0127 | 0.0037 | Down |
| 498001301 | long-chain acyl-CoA synthetase                                                            | 0.017  | 0.0025 | Down |
| 498001319 | branched-chain alpha-keto acid dehydrogenase subunit E2                                   | 0.0212 | 0.0097 | Down |
| 498001323 | branched-chain alpha-keto acid dehydrogenase subunit E2                                   | 0.0225 | 0.0038 | Down |
| 498001335 | apolipoprotein N-acyltransferase                                                          | 0.0092 | 0.0036 | Down |
| 498001350 | hypothetical protein SCB02_06085                                                          | 0.0079 | 0.0021 | Down |
| 498001353 | hypothetical protein SCB02_06100                                                          | 0.0046 | 0.0022 | Down |
| 498001358 | cell division protein FtsH3                                                               | 0.0106 | 0.004  | Down |
| 498001362 | putative riboflavin kinase/FAD synthase                                                   | 0.0231 | 0.0117 | Down |
| 498001409 | thiamine-phosphate pyrophosphorylase                                                      | 0.0078 | 0.002  | Down |
| 498001412 | hypothetical protein SCB02_06212                                                          | 0.0282 | 0.0146 | Down |
| 498001417 | 30S ribosomal protein S16                                                                 | 0.153  | 0.0205 | Down |
| 498001452 | pyruvate dehydrogenase E1 alpha subunit                                                   | 0.0247 | 0.0068 | Down |
| 498001458 | tRNA-specific 2-thiouridylase MnmA                                                        | 0.0103 | 0.003  | Down |
| 498001477 | photosystem II CP43 protein                                                               | 0.0652 | 0.0254 | Down |
| 498001497 | peptidyl-prolyl cis-trans isomerase                                                       | 0.0261 | 0.0076 | Down |
| 498001511 | 3-beta hydroxysteroid dehydrogenase/isomerase family protein                              | 0.0481 | 0.0143 | Down |
| 498001523 | hypothetical protein SCB02_06467                                                          | 0.017  | 0.0043 | Down |
| 498001539 | thioredoxin reductase                                                                     | 0.0095 | 0.0046 | Down |
| 498001561 | hypothetical protein SCB02_06507                                                          | 0.0368 | 0.0177 | Down |
| 498001563 | hypothetical protein SCB02_06522                                                          | 0.0162 | 0.0037 | Down |
| 498001570 | putative nicotinamide nucleotide transhydrogenase, subunit alpha 2                        | 0.0141 | 0.003  | Down |
| 498001573 | putative nicotinamide nucleotide transhydrogenase, subunit beta                           | 0.0403 | 0.012  | Down |
| 498001575 | hypothetical protein SCB02_06557                                                          | 0.022  | 0.0044 | Down |
| 498001582 | glutamyl-tRNA synthetase                                                                  | 0.0062 | 0.0032 | Down |
| 498001607 | 50S ribosomal protein L19                                                                 | 0.182  | 0.0241 | Down |
| 498001609 | methionine aminopeptidase                                                                 | 0.0167 | 0.0061 | Down |
| 498001614 | hypothetical protein SCB02_06642                                                          | 0.0224 | 0.0046 | Down |
| 498001618 | TRAP-T family tripartite transporter                                                      | 0.0127 | 0.0021 | Down |
| 498001630 | glutamate-1-semialdehyde aminotransferase                                                 | 0.0365 | 0.0092 | Down |
| 498001636 | putative glycolate oxidase subunit GlcD                                                   | 0.0084 | 0.0022 | Down |
| 498001638 | hypothetical protein SCB02_06712                                                          | 0.0145 | 0.0035 | Down |
| 498001645 | permease                                                                                  | 0.0069 | 0.0015 | Down |
| 498001686 | hypothetical protein SCB02_06806                                                          | 0.0127 | 0.0043 | Down |
| 498001688 | bifunctional phosphoribosyl-AMP cyclohydrolase/phosphoribosyl-ATP pyrophosphatase protein | 0.024  | 0.0118 | Down |
| 498001696 | RND family multidrug efflux protein                                                       | 0.0026 | 0.0007 | Down |
| 498001701 | putative membrane protein                                                                 | 0.0099 | 0.0051 | Down |
| 498001706 | hypothetical protein SCB02_06886                                                          | 0.0364 | 0.0062 | Down |
| 498001723 | AraC-type regulatory protein, putative                                                    | 0.0081 | 0.0009 | Down |
| 498001768 | Methyltransferase type 11                                                                 | 0.0119 | 0.0031 | Down |
| 498001854 | hypothetical protein SCB02_07278                                                          | 0.0033 | 0.0014 | Down |
| 498001878 | Rho termination factor domain-containing protein                                          | 0.0454 | 0.0189 | Down |
| 498001886 | hypothetical protein SCB02_07333                                                          | 0.0696 | 0.0052 | Down |
| 498001900 | hypothetical protein SCB02_07428                                                          | 0.0132 | 0.0051 | Down |
| 498001937 | hypothetical protein SCB02_07468                                                          | 0.0537 | 0.0127 | Down |
| 498001954 | hypothetical protein SCB02_07518                                                          | 0.0098 | 0.0023 | Down |
| 498001974 | hypothetical protein SCB02_07583                                                          | 0.0109 | 0.0044 | Down |
| 498002000 | ABC-type multidrug transport system, ATPase and permease components                       | 0.0195 | 0.0113 | Down |
| 498002084 | ATP phosphoribosyltransferase catalytic subunit                                           | 0.0163 | 0.0081 | Down |
| 498002335 | CO2 hydration protein ChpX                                                                | 0.0101 | 0.0044 | Down |
| 498002355 | NAD(P)H-quinone oxidoreductase chain 4                                                    | 0.0366 | 0.0079 | Down |
| 498002357 | NAD(P)H-quinone oxidoreductase subunit F                                                  | 0.03   | 0.006  | Down |
| 498002359 | putative carboxysome shell polypeptide CsoS3                                              | 0.0098 | 0.003  | Down |
| 498002378 | carboxysome shell polypeptide, CsoS2                                                      | 0.0262 | 0.0044 | Down |
| 498002379 | ribulose bisphosphate carboxylase, small chain                                            | 0.2919 | 0.0674 | Down |
| 498002381 | ribulose bisphosphate carboxylase                                                         | 0.1115 | 0.0202 | Down |
| 498002383 | carboxysome shell peptide                                                                 | 0.1185 | 0.0157 | Down |
| 498002398 | MFS superfamily sulfate permease                                                          | 0.0256 | 0.0065 | Down |
| 498002401 | Ca2+/Na+ antiporter                                                                       | 0.0223 | 0.0039 | Down |
| 498002407 | ammonium transporter                                                                      | 0.1559 | 0.0512 | Down |
| 498002412 | di/tricarboxylate transporter                                                             | 0.0167 | 0.0046 | Down |
| 498002414 | hypothetical protein SCB02_08605                                                          | 0.0086 | 0.0032 | Down |
| 498002415 | Trk family sodium transporter                                                             | 0.0136 | 0.0032 | Down |
| 498002418 | light-independent protochlorophyllide reductase subunit B                                 | 0.0194 | 0.0077 | Down |
| 498002419 | protochlorophyllide reductase iron-sulfur ATP-binding protein                             | 0.1673 | 0.069  | Down |
| 498002438 | Zn-dependent membrane associated protease                                                 | 0.0337 | 0.0056 | Down |
| 498002443 | GTP cyclohydrolase I                                                                      | 0.0369 | 0.0134 | Down |
| 498002445 | short chain dehydrogenase                                                                 | 0.0089 | 0.0028 | Down |
| 498002449 | acyl-ACP reductase                                                                        | 0.0131 | 0.0054 | Down |
| 498002451 | aldehyde decarboxylase                                                                    | 0.027  | 0.0071 | Down |
| 498002456 | small subunit ribosomal protein S1                                                        | 0.0305 | 0.005  | Down |
| 498002457 | hypothetical protein SCB02_08730                                                          | 0.0145 | 0.0033 | Down |
| 498002459 | hypothetical protein SCB02_08735                                                          | 0.0081 | 0.0026 | Down |
| 498002464 | hypothetical protein SCB02_08760                                                          | 0.0261 | 0.009  | Down |
| 498002469 | acetolactate synthase 3 catalytic subunit                                                 | 0.028  | 0.0051 | Down |
| 498002486 | cob(l)alamin adenosyltransferase                                                          | 0.0117 | 0.006  | Down |
| 498002496 | hypothetical protein SCB02_08820                                                          | 0.0062 | 0.0025 | Down |
| 498002510 | ferredoxin                                                                                | 0.0465 | 0.0097 | Down |
| 498002522 | carbohydrate kinase                                                                       | 0.007  | 0.0037 | Down |
| 498002540 | glycosyl transferase family 39                                                            | 0.0122 | 0.0075 | Down |
| 498002568 | cytochrome C6                                                                             | 0.0215 | 0.0061 | Down |

|           |                                                                                              |        |        |      |
|-----------|----------------------------------------------------------------------------------------------|--------|--------|------|
| 498002569 | nucleoside-diphosphate-sugar epimerase                                                       | 0.0262 | 0.0044 | Down |
| 498002571 | glycogen branching enzyme                                                                    | 0.0177 | 0.0018 | Down |
| 498002573 | acyl esterase                                                                                | 0.0041 | 0.0016 | Down |
| 498002577 | hypothetical protein SCB02_09100                                                             | 0.0181 | 0.0067 | Down |
| 498002579 | hypothetical protein SCB02_09105                                                             | 0.0046 | 0.0009 | Down |
| 498002590 | phosphofructokinase                                                                          | 0.0057 | 0.0026 | Down |
| 498002594 | homoserine kinase                                                                            | 0.0135 | 0.0019 | Down |
| 498002598 | threonyl-tRNA synthetase                                                                     | 0.0098 | 0.002  | Down |
| 498002605 | cation efflux system protein                                                                 | 0.0096 | 0.0031 | Down |
| 498002606 | membrane associated GTPase                                                                   | 0.0108 | 0.0018 | Down |
| 498002614 | hypothetical protein SCB02_09240                                                             | 0.018  | 0.0084 | Down |
| 498002616 | menaquinone biosynthesis protein MenD (2-succinyl-6-hydroxy-2,4-cyclohexadiene-1-carboxylate | 0.0056 | 0.0014 | Down |
| 498002623 | glycogen synthase                                                                            | 0.0136 | 0.0041 | Down |
| 498002627 | 3-phosphoshikimate 1-carboxyvinyltransferase                                                 | 0.0124 | 0.0026 | Down |
| 498002631 | 3-oxoaprenyl-4-hydroxybenzoate decarboxylase                                                 | 0.0064 | 0.0015 | Down |
| 498002633 | nitrilase                                                                                    | 0.0117 | 0.0032 | Down |
| 498002636 | solaneyl diphosphate synthase                                                                | 0.023  | 0.0047 | Down |
| 498002638 | acetyl-coenzyme A synthetase                                                                 | 0.0078 | 0.0032 | Down |
| 498002649 | heavy metal ABC transporter (HMT) family permease/ATP-binding protein                        | 0.0128 | 0.0033 | Down |
| 498002654 | carbamoyl phosphate synthase small subunit                                                   | 0.018  | 0.0022 | Down |
| 498002658 | tRNA/rRNA methyltransferase (SpoU):RNA methyltransferase TrmH                                | 0.0202 | 0.0034 | Down |
| 498002660 | aspartyl/glutamyl-tRNA amidotransferase subunit A                                            | 0.0234 | 0.0037 | Down |
| 498002661 | DNA polymerase III subunit alpha                                                             | 0.006  | 0.0024 | Down |
| 498002662 | hypothetical protein SCB02_09450                                                             | 0.0415 | 0.0139 | Down |
| 498002663 | 30S ribosomal protein S15                                                                    | 0.084  | 0.0155 | Down |
| 498002689 | hypothetical protein SCB02_09535                                                             | 0.0101 | 0.004  | Down |
| 498002697 | preprotein translocase subunit SecD                                                          | 0.0152 | 0.0034 | Down |
| 498002705 | permease                                                                                     | 0.0108 | 0.0014 | Down |
| 498002716 | methyltransferase, UbiE/COQ5 family protein                                                  | 0.0054 | 0.0009 | Down |
| 498002718 | glutamine synthetase, glutamate--ammonia ligase                                              | 0.0136 | 0.0048 | Down |
| 498002723 | pyridoxal-dependent decarboxylase family protein                                             | 0.0051 | 0.0015 | Down |
| 498002730 | insulinase family protein                                                                    | 0.0044 | 0.0017 | Down |
| 498002736 | ABC transporter                                                                              | 0.013  | 0.0034 | Down |
| 498002737 | ABC-transporter, membrane spanning component                                                 | 0.0066 | 0.0011 | Down |
| 498002753 | glycosyltransferase                                                                          | 0.0164 | 0.004  | Down |
| 498002754 | 30S ribosomal protein S2                                                                     | 0.0897 | 0.0177 | Down |
| 498002755 | translation elongation factor Ts                                                             | 0.0223 | 0.0059 | Down |
| 498002759 | sulfite reductase subunit beta                                                               | 0.0141 | 0.0045 | Down |
| 498002760 | glycyl-tRNA synthetase beta subunit                                                          | 0.0162 | 0.0039 | Down |
| 498002761 | fatty acid desaturase                                                                        | 0.0236 | 0.0029 | Down |
| 498002763 | geranylgeranyl hydrogenase                                                                   | 0.0243 | 0.0063 | Down |
| 498002766 | GTP-binding protein TypA                                                                     | 0.0226 | 0.0086 | Down |
| 498002770 | permease                                                                                     | 0.0135 | 0.002  | Down |
| 498002772 | cytochrome c assembly protein                                                                | 0.0237 | 0.0053 | Down |
| 498002775 | fructose 1,6-bisphosphatase II                                                               | 0.022  | 0.0082 | Down |
| 498002777 | glutamyl-tRNA reductase                                                                      | 0.0121 | 0.0023 | Down |
| 498002779 | glucose-1-phosphate adenyltransferase                                                        | 0.0192 | 0.0068 | Down |
| 498002789 | Uracil phosphoribosyltransferase                                                             | 0.0135 | 0.0022 | Down |
| 498002792 | pentapeptide repeat-containing protein                                                       | 0.0094 | 0.0028 | Down |
| 498002793 | hydrogenase accessory membrane protein                                                       | 0.0515 | 0.0101 | Down |
| 498002797 | phosphoribosylformylglycinamide synthase I                                                   | 0.0388 | 0.0056 | Down |
| 498002803 | two component transcriptional regulator, winged helix family protein                         | 0.0505 | 0.0114 | Down |
| 498002806 | hypothetical protein SCB02_09907                                                             | 0.0284 | 0.0099 | Down |
| 498002812 | zinc metalloproteinase                                                                       | 0.0135 | 0.0043 | Down |
| 498002815 | proton extrusion protein PcxA                                                                | 0.0095 | 0.0033 | Down |
| 498002821 | methionyl-tRNA synthetase                                                                    | 0.0062 | 0.0014 | Down |
| 498002827 | 30S ribosomal protein S18                                                                    | 0.2506 | 0.0542 | Down |
| 498002829 | 50S ribosomal protein L33                                                                    | 0.077  | 0.0307 | Down |
| 498002831 | phenylalanyl-tRNA synthetase subunit beta                                                    | 0.0085 | 0.0017 | Down |
| 498002835 | allophycocyanin alpha, B subunit                                                             | 0.0323 | 0.0185 | Down |
| 498002836 | DnaJ domain-containing protein                                                               | 0.0053 | 0.0011 | Down |
| 498002848 | hypothetical protein SCB02_10052                                                             | 0.0139 | 0.005  | Down |
| 498002852 | methionine synthase (5-methyltetrahydrofolate--homocysteine methyltransferase)               | 0.0061 | 0.0008 | Down |
| 498002858 | hypothetical protein SCB02_10077                                                             | 0.0542 | 0.0252 | Down |
| 498002879 | excinuclease ABC subunit C                                                                   | 0.0081 | 0.0034 | Down |
| 498002881 | flavin reductase-like domain-containing protein                                              | 0.0527 | 0.021  | Down |
| 498002885 | hypothetical protein SCB02_10124                                                             | 0.0079 | 0.0015 | Down |
| 498002887 | D-alanyl-D-alanine carboxypeptidase                                                          | 0.0067 | 0.0021 | Down |
| 498002888 | hypothetical protein SCB02_10134                                                             | 0.0286 | 0.0065 | Down |
| 498002894 | diaminopimelate epimerase                                                                    | 0.0179 | 0.0054 | Down |
| 498002896 | leucyl-tRNA synthetase                                                                       | 0.0053 | 0.0018 | Down |
| 498002897 | glucose-6-phosphate isomerase                                                                | 0.0086 | 0.0024 | Down |
| 498002900 | protease                                                                                     | 0.005  | 0.0027 | Down |
| 498002905 | N-acetyl-gamma-glutamyl-phosphate reductase                                                  | 0.0142 | 0.0027 | Down |
| 498002914 | molecular chaperone DnaK                                                                     | 0.0063 | 0.0022 | Down |
| 498002915 | putative phosphate ABC transporter                                                           | 0.0393 | 0.0067 | Down |
| 498002916 | putative phosphate ABC transporter                                                           | 0.0211 | 0.0055 | Down |
| 498002918 | phosphate ABC transporter ATP-binding protein                                                | 0.0141 | 0.0023 | Down |
| 498002922 | inositol-1(or 4)-monophosphatase                                                             | 0.0077 | 0.0024 | Down |
| 498002924 | ATP phosphoribosyltransferase regulatory subunit                                             | 0.0069 | 0.0027 | Down |
| 498002928 | hypothetical protein SCB02_10269                                                             | 0.0324 | 0.0159 | Down |
| 498002937 | glucosylglycerol-phosphate synthase                                                          | 0.005  | 0.0017 | Down |
| 498002953 | 50S ribosomal protein L28                                                                    | 0.0407 | 0.0086 | Down |
| 498003040 | glutaredoxin                                                                                 | 0.0133 | 0.0015 | Down |
| 498003042 | rhomboid family protein                                                                      | 0.0148 | 0.0052 | Down |
| 498003079 | 1-deoxy-D-xylulose-5-phosphate synthase                                                      | 0.0271 | 0.0047 | Down |
| 498003083 | hypothetical protein SCB02_10731                                                             | 0.0191 | 0.0049 | Down |
| 498003085 | pyruvate kinase                                                                              | 0.0181 | 0.0035 | Down |
| 498003086 | peptide ABC transporter permease                                                             | 0.0085 | 0.0017 | Down |
| 498003090 | ATP-dependent Clp protease proteolytic subunit                                               | 0.0201 | 0.0069 | Down |
| 498003092 | Thf1-like protein                                                                            | 0.0239 | 0.0061 | Down |
| 498003100 | cytochrome b6-f complex subunit PetN                                                         | 0.0663 | 0.0189 | Down |
| 498003175 | endolysin                                                                                    | 0.0146 | 0.0044 | Down |

|           |                                                                                   |        |        |      |
|-----------|-----------------------------------------------------------------------------------|--------|--------|------|
| 498003271 | hypothetical protein SCB02_11216                                                  | 0.0097 | 0.0038 | Down |
| 498003304 | fructose-1,6-bisphosphate aldolase                                                | 0.0286 | 0.0057 | Down |
| 498003306 | hypothetical protein SCB02_11286                                                  | 0.0029 | 0.0009 | Down |
| 498003314 | cell division protein FtsH4                                                       | 0.0102 | 0.0043 | Down |
| 498003317 | hypothetical protein SCB02_11321                                                  | 0.0115 | 0.0036 | Down |
| 498003320 | Fe-S cluster protein                                                              | 0.0207 | 0.0022 | Down |
| 498003331 | hypothetical protein SCB02_11371                                                  | 0.0079 | 0.0027 | Down |
| 498003332 | magnesium-protoporphyrin IX monomethyl ester cyclase                              | 0.0197 | 0.0042 | Down |
| 498003333 | putative modulator of DNA gyrase; TldD                                            | 0.0087 | 0.0018 | Down |
| 498003345 | transcription-repair coupling factor                                              | 0.0033 | 0.0006 | Down |
| 498003348 | carboxyl-terminal processing protease                                             | 0.0083 | 0.002  | Down |
| 498003350 | 4-hydroxy-3-methylbut-2-en-1-yl diphosphate synthase                              | 0.0144 | 0.0034 | Down |
| 498003375 | Hsp33-like chaperonin                                                             | 0.0069 | 0.0022 | Down |
| 498003378 | hypothetical protein SCB02_11536                                                  | 0.0255 | 0.0072 | Down |
| 498003380 | peptide chain release factor 3                                                    | 0.0092 | 0.0016 | Down |
| 498003415 | hypothetical protein SCB02_11631                                                  | 0.0095 | 0.0024 | Down |
| 498003563 | sirohdrochlorin cobaltochelataase                                                 | 0.0037 | 0.0012 | Down |
| 498003568 | hypothetical protein SCB02_12028                                                  | 0.0114 | 0.0019 | Down |
| 498003573 | carbamoyl phosphate synthase large subunit                                        | 0.0101 | 0.0022 | Down |
| 498003577 | Sodium:alanine symporter family protein                                           | 0.0118 | 0.0039 | Down |
| 498003597 | hypothetical protein SCB02_12153                                                  | 0.019  | 0.0102 | Down |
| 498003607 | hypothetical protein SCB02_12205                                                  | 0.0406 | 0.0129 | Down |
| 498003614 | ABC-type phosphate transport system, substrate binding protein                    | 0.0377 | 0.006  | Down |
| 498003615 | putative phosphate ABC transporter                                                | 0.0128 | 0.0017 | Down |
| 498003616 | putative phosphate ABC transporter                                                | 0.0064 | 0.0024 | Down |
| 498003619 | chromate transporter                                                              | 0.004  | 0.0014 | Down |
| 498003623 | transcriptional regulator                                                         | 0.0514 | 0.0081 | Down |
| 498003625 | two component transcriptional regulator                                           | 0.0089 | 0.004  | Down |
| 498003628 | hypothetical protein SCB02_12310                                                  | 0.033  | 0.007  | Down |
| 498003633 | oxidoreductase, FAD-dependent                                                     | 0.0048 | 0.001  | Down |
| 498003637 | glutamine synthetase catalytic region                                             | 0.0113 | 0.0042 | Down |
| 498003642 | ANL40                                                                             | 0.0311 | 0.0067 | Down |
| 498003653 | fatty acid desaturase, type 2                                                     | 0.015  | 0.0058 | Down |
| 498003659 | tRNA (uracil-5-)-methyltransferase Gid                                            | 0.0122 | 0.002  | Down |
| 498003665 | two-component response regulator                                                  | 0.021  | 0.0085 | Down |
| 498003680 | RNA-binding protein RbpD                                                          | 0.0488 | 0.0101 | Down |
| 498003683 | membrane bound transcriptional regulator-like protein                             | 0.0299 | 0.0052 | Down |
| 498003700 | biotin synthase                                                                   | 0.0158 | 0.0022 | Down |
| 498003702 | hypothetical protein SCB02_12692                                                  | 0.0215 | 0.003  | Down |
| 498003703 | diaminopimelate decarboxylase                                                     | 0.0188 | 0.0026 | Down |
| 498003705 | ATPase                                                                            | 0.0291 | 0.0086 | Down |
| 498003709 | glyceraldehyde-3-phosphate dehydrogenase                                          | 0.0099 | 0.0024 | Down |
| 498003715 | phosphatidate cytidylyltransferase                                                | 0.0136 | 0.0011 | Down |
| 498003726 | aminopeptidase N                                                                  | 0.0086 | 0.0016 | Down |
| 498003731 | ferredoxin-NADP oxidoreductase                                                    | 0.0197 | 0.0027 | Down |
| 498003756 | 2-isopropylmalate synthase                                                        | 0.014  | 0.005  | Down |
| 498003758 | hypothetical protein SCB02_12972                                                  | 0.0061 | 0.0023 | Down |
| 498003764 | inosine 5-monophosphate dehydrogenase                                             | 0.042  | 0.0128 | Down |
| 498003780 | putative beta-lactamase                                                           | 0.0042 | 0.0014 | Down |
| 498003786 | hypothetical protein SCB02_13074                                                  | 0.0122 | 0.0043 | Down |
| 498003790 | homoserine dehydrogenase                                                          | 0.0113 | 0.0043 | Down |
| 498003797 | fused dienelactone hydrolase/uncharacterized domain                               | 0.0052 | 0.0026 | Down |
| 498003812 | GTP-binding protein YchF                                                          | 0.0109 | 0.0049 | Down |
| 498003815 | membrane fusion protein                                                           | 0.0104 | 0.0046 | Down |
| 498003818 | UGMP family protein                                                               | 0.0532 | 0.0043 | Down |
| 498003819 | photosystem I reaction center subunit III                                         | 0.056  | 0.0188 | Down |
| 498003823 | Sec-independent protein secretion pathway component TatC                          | 0.0109 | 0.0032 | Down |
| 498003825 | cytochrome b6-f complex iron-sulfur subunit                                       | 0.0506 | 0.008  | Down |
| 498003828 | apocytochrome f                                                                   | 0.0322 | 0.0096 | Down |
| 498003830 | prolipoprotein diacylglycerol transferase                                         | 0.0149 | 0.0019 | Down |
| 498003841 | putative exopolyphosphatase                                                       | 0.0059 | 0.0016 | Down |
| 498003858 | chaperonin GroEL                                                                  | 0.008  | 0.0023 | Down |
| 498003859 | hypothetical protein SCB02_13301                                                  | 0.0273 | 0.0084 | Down |
| 498003899 | hypothetical protein SCB02_13396                                                  | 0.0184 | 0.0046 | Down |
| 498003905 | NAD(P)H-quinone oxidoreductase subunit 2                                          | 0.0851 | 0.0092 | Down |
| 498003913 | glycosyltransferase of family UDP-glucose:tetrahydrobiopterin glucosyltransferase | 0.0153 | 0.0034 | Down |
| 498003915 | DMT family permease                                                               | 0.027  | 0.0084 | Down |
| 498003919 | hypothetical protein SCB02_13476                                                  | 0.0216 | 0.0089 | Down |
| 498003926 | AAA family ATPase                                                                 | 0.0049 | 0.0019 | Down |
| 498003943 | indole-3-glycerol-phosphate synthase                                              | 0.0183 | 0.0037 | Down |
| 498003945 | dihydroliipoamide dehydrogenase                                                   | 0.0181 | 0.0019 | Down |
| 498003950 | UDP-N-acetylglucosamine 1-carboxyvinyltransferase                                 | 0.0101 | 0.0027 | Down |
| 498003965 | D-alanine-D-alanine ligase                                                        | 0.0083 | 0.0029 | Down |
| 498003973 | cell division protein FtsZ                                                        | 0.0469 | 0.0125 | Down |
| 498003977 | integral membrane protein                                                         | 0.0118 | 0.0032 | Down |
| 498003978 | ATP-dependent Clp protease-like protein                                           | 0.0108 | 0.0019 | Down |
| 498003979 | ATP-dependent Clp protease proteolytic subunit                                    | 0.0171 | 0.0055 | Down |
| 498004011 | kinase                                                                            | 0.0184 | 0.0066 | Down |
| 497998709 | menaquinone biosynthesis methyltransferase                                        | 0.0036 | 0.0025 | -    |
| 497998725 | glycosyltransferase                                                               | 0.0038 | 0.0028 | -    |
| 497998745 | GTP-binding protein LepA                                                          | 0.0142 | 0.0142 | -    |
| 497998833 | hypothetical protein SCB02_00359                                                  | 0.0101 | 0.0043 | -    |
| 497998862 | HIT (histidine triad) family protein                                              | 0.0332 | 0.0306 | -    |
| 497998910 | membrane protein-related protein                                                  | 0.0168 | 0.0078 | -    |
| 497998912 | phosphatidylcholine-hydrolyzing phospholipase D family protein                    | 0.0038 | 0.0067 | -    |
| 497998917 | hypothetical protein SCB02_00564                                                  | 0.0062 | 0.0116 | -    |
| 497998933 | RND family multidrug efflux transporter                                           | 0.0007 | 0.0006 | -    |
| 497998951 | HAD superfamily hydrolase                                                         | 0.0028 | 0.0028 | -    |
| 497998975 | hypothetical protein SCB02_00676                                                  | 0.0302 | 0.0237 | -    |
| 497999016 | inositol monophosphate family protein                                             | 0.0109 | 0.0073 | -    |
| 497999045 | pyrimidine reductase, riboflavin biosynthesis                                     | 0.0111 | 0.0084 | -    |
| 497999053 | hypothetical protein SCB02_00846                                                  | 0.0032 | 0.0046 | -    |
| 497999069 | ribosome-binding factor A                                                         | 0.0051 | 0.0047 | -    |
| 497999096 | porin                                                                             | 0.0089 | 0.0056 | -    |

|           |                                                                     |        |        |   |
|-----------|---------------------------------------------------------------------|--------|--------|---|
| 497999136 | two-component system response regulator                             | 0.0066 | 0.0042 | - |
| 497999164 | tRNA nucleotidyltransferase/poly(A) polymerase                      | 0.0056 | 0.0026 | - |
| 497999186 | hypothetical protein SCB02_01121                                    | 0.0164 | 0.0106 | - |
| 497999222 | ABC-type multidrug transport system, ATPase and permease components | 0.0024 | 0.0011 | - |
| 497999229 | adenylsulfate kinase                                                | 0.0049 | 0.0027 | - |
| 497999241 | two component LuxR family transcriptional regulator                 | 0.008  | 0.0043 | - |
| 497999243 | hypothetical protein SCB02_01256                                    | 0.0079 | 0.0044 | - |
| 497999256 | hypothetical protein SCB02_01286                                    | 0.0065 | 0.0062 | - |
| 497999259 | thioesterase                                                        | 0.0041 | 0.0016 | - |
| 497999281 | ion transport protein                                               | 0.0041 | 0.004  | - |
| 497999285 | glutaredoxin                                                        | 0.0055 | 0.013  | - |
| 497999314 | ABC transporter ATP-binding protein                                 | 0.0032 | 0.0024 | - |
| 497999336 | two-component sensor histidine kinase                               | 0.0024 | 0.0018 | - |
| 497999352 | general (type II) secretion pathway protein D precursor             | 0.0029 | 0.0041 | - |
| 497999399 | GntR family regulatory protein                                      | 0.0034 | 0.0053 | - |
| 497999423 | hypothetical protein SCB02_01713                                    | 0.0101 | 0.0084 | - |
| 497999434 | Delta-9 acyl-phospholipid desaturase                                | 0.0267 | 0.0169 | - |
| 497999459 | hypothetical protein SCB02_01798                                    | 0.0096 | 0.0075 | - |
| 497999482 | hypothetical protein SCB02_01828                                    | 0.0046 | 0.0055 | - |
| 497999484 | hypothetical protein SCB02_01833                                    | 0.009  | 0.0056 | - |
| 497999487 | hypothetical protein SCB02_01843                                    | 0.008  | 0.004  | - |
| 497999561 | CTP synthetase                                                      | 0.011  | 0.0115 | - |
| 497999582 | urease accessory protein UreG                                       | 0.0078 | 0.0042 | - |
| 497999607 | hypothetical protein SCB02_02062                                    | 0.008  | 0.0059 | - |
| 497999610 | hypothetical protein SCB02_02067                                    | 0.0041 | 0.0083 | - |
| 497999632 | molybdenum cofactor biosynthesis protein A                          | 0.0034 | 0.002  | - |
| 497999665 | Fe-S oxidoreductas                                                  | 0.0055 | 0.003  | - |
| 497999676 | ABC transporter, substrate binding protein, phosphate               | 0.0031 | 0.0012 | - |
| 497999694 | hypothetical protein SCB02_02267                                    | 0.0107 | 0.0062 | - |
| 497999698 | hypothetical protein SCB02_02277                                    | 0.0127 | 0.0085 | - |
| 497999704 | phage integrase family protein                                      | 0.0036 | 0.0082 | - |
| 497999726 | putative cell envelope-related function transcriptional attenuator  | 0.0024 | 0.0022 | - |
| 497999750 | ATP-dependent protease ATP-binding subunit ClpX                     | 0.0046 | 0.0032 | - |
| 497999767 | hypothetical protein SCB02_02417                                    | 0.0092 | 0.0046 | - |
| 497999789 | hypothetical protein SCB02_02477                                    | 0.0147 | 0.0175 | - |
| 497999836 | general secretion pathway protein E                                 | 0.01   | 0.0077 | - |
| 497999838 | twitching motility protein                                          | 0.0026 | 0.0013 | - |
| 497999859 | putative ribonuclease III                                           | 0.0071 | 0.0031 | - |
| 497999946 | peptidase, M20D family protein                                      | 0.0052 | 0.0025 | - |
| 497999954 | serine/threonine protein kinase                                     | 0.0022 | 0.0019 | - |
| 497999965 | hypothetical protein SCB02_02881                                    | 0.0101 | 0.004  | - |
| 497999998 | threonine synthase                                                  | 0.0715 | 0.0685 | - |
| 498000002 | hypothetical protein SCB02_02971                                    | 0.0057 | 0.0082 | - |
| 498000017 | DNA mismatch repair protein MutS                                    | 0.0022 | 0.0013 | - |
| 498000044 | translation initiation factor IF-3                                  | 0.017  | 0.0136 | - |
| 498000046 | tRNA delta(2)-isopentenylpyrophosphate transferase                  | 0.0101 | 0.0109 | - |
| 498000048 | DNA gyrase subunit B                                                | 0.027  | 0.0298 | - |
| 498000052 | hypothetical protein SCB02_03086                                    | 0.0143 | 0.0462 | - |
| 498000055 | crcB protein                                                        | 0.0202 | 0.0404 | - |
| 498000057 | glutathione peroxidase                                              | 0.023  | 0.0113 | - |
| 498000080 | A/G-specific adenine glycosylase                                    | 0.0067 | 0.0076 | - |
| 498000147 | UvrD/REP helicase                                                   | 0.0125 | 0.0154 | - |
| 498000158 | glycosyl transferase                                                | 0.0044 | 0.0097 | - |
| 498000161 | lipopolysaccharide synthesis sugar transferase                      | 0.0076 | 0.0035 | - |
| 498000163 | sugar transferase                                                   | 0.0211 | 0.0145 | - |
| 498000166 | lipolytic protein G-D-S-L family                                    | 0.0045 | 0.0019 | - |
| 498000169 | glycosyltransferase                                                 | 0.0098 | 0.0073 | - |
| 498000174 | glycosyltransferase                                                 | 0.0052 | 0.0051 | - |
| 498000184 | hypothetical protein SCB02_03358                                    | 0.0195 | 0.0411 | - |
| 498000189 | glycosyltransferase                                                 | 0.008  | 0.0115 | - |
| 498000195 | glycosyl transferase family 2                                       | 0.0119 | 0.0082 | - |
| 498000197 | hypothetical protein SCB02_03388                                    | 0.01   | 0.0103 | - |
| 498000202 | methyltransferase FkbM                                              | 0.0082 | 0.0094 | - |
| 498000206 | hypothetical protein SCB02_03408                                    | 0.0031 | 0.0038 | - |
| 498000208 | hypothetical protein SCB02_03413                                    | 0.0023 | 0.0038 | - |
| 498000214 | putative GDP-L-fucose synthetase                                    | 0.0132 | 0.0143 | - |
| 498000251 | 2-amino-4-hydroxy-6-hydroxymethylhydropteridine pyrophosphokinase   | 0.004  | 0.0033 | - |
| 498000254 | deoxyribodipyrimidine photolase                                     | 0.0064 | 0.0037 | - |
| 498000262 | hypothetical protein SCB02_03543                                    | 0.0016 | 0.004  | - |
| 498000296 | oxidoreductase                                                      | 0.0105 | 0.0159 | - |
| 498000330 | pentapeptide repeat-containing protein                              | 0.0156 | 0.0248 | - |
| 498000333 | photosystem II reaction center protein H                            | 0.1507 | 0.0682 | - |
| 498000345 | cob(I)alamin adenosyltransferase                                    | 0.0055 | 0.004  | - |
| 498000347 | deoxycytidine triphosphate deaminase                                | 0.0061 | 0.0027 | - |
| 498000355 | ferredoxin                                                          | 0.0024 | 0.003  | - |
| 498000360 | soluble lytic transglycosylase                                      | 0.0034 | 0.0038 | - |
| 498000362 | phosphoglucosamine mutase                                           | 0.0063 | 0.0059 | - |
| 498000476 | hypothetical protein SCB02_04081                                    | 0.0278 | 0.0173 | - |
| 498000491 | hypothetical protein SCB02_04116                                    | 0.0018 | 0.0047 | - |
| 498000530 | transcriptional regulator NrdR                                      | 0.0156 | 0.0093 | - |
| 498000552 | hypothetical protein SCB02_04238                                    | 0.0075 | 0.0076 | - |
| 498000582 | hypothetical protein SCB02_04308                                    | 0.0077 | 0.0124 | - |
| 498000589 | hypothetical protein SCB02_04323                                    | 0.0019 | 0.0017 | - |
| 498000598 | hypothetical protein SCB02_04343                                    | 0.0027 | 0.0017 | - |
| 498000617 | hypothetical protein SCB02_04383                                    | 0.0115 | 0.0064 | - |
| 498000645 | rare lipoprotein A                                                  | 0.0082 | 0.011  | - |
| 498000701 | ATPase                                                              | 0.0083 | 0.0043 | - |
| 498000748 | hypothetical protein SCB02_04654                                    | 0.0168 | 0.0098 | - |
| 498000772 | putative ldpA protein                                               | 0.0148 | 0.0192 | - |
| 498000930 | formamidopyrimidine-DNA glycosylase                                 | 0.0034 | 0.0022 | - |
| 498000937 | peptidoglycan-binding LysM                                          | 0.0042 | 0.003  | - |
| 498000939 | putative aldehyde dehydrogenase                                     | 0.0037 | 0.002  | - |
| 498001033 | putative glutathione S-transferase                                  | 0.0019 | 0.0025 | - |
| 498001034 | aspartoacylase                                                      | 0.003  | 0.0042 | - |

|           |                                                                                  |        |        |   |
|-----------|----------------------------------------------------------------------------------|--------|--------|---|
| 498001097 | hypothetical protein SCB02_05383                                                 | 0.0105 | 0.0065 | - |
| 498001145 | cell division protein FtsW                                                       | 0.0051 | 0.0034 | - |
| 498001169 | hypothetical protein SCB02_05573                                                 | 0.0048 | 0.0048 | - |
| 498001172 | hypothetical protein SCB02_05588                                                 | 0.0014 | 0.0025 | - |
| 498001196 | forkhead-associated protein                                                      | 0.0255 | 0.0458 | - |
| 498001200 | FHA modulated glycosyl transferase/transpeptidase                                | 0.006  | 0.0069 | - |
| 498001218 | DnaK family protein                                                              | 0.0124 | 0.0188 | - |
| 498001227 | 3-hydroxyisobutyrate dehydrogenase related protein                               | 0.0021 | 0.002  | - |
| 498001241 | ribosomal protein L11 methyltransferase                                          | 0.0085 | 0.005  | - |
| 498001245 | cytochrome c-550                                                                 | 0.0299 | 0.018  | - |
| 498001247 | ribonuclease Z                                                                   | 0.0072 | 0.008  | - |
| 498001306 | transporter, major facilitator family protein                                    | 0.0072 | 0.0049 | - |
| 498001339 | superoxide dismutase                                                             | 0.0091 | 0.0051 | - |
| 498001371 | hypothetical protein SCB02_06140                                                 | 0.0142 | 0.0189 | - |
| 498001372 | hypothetical protein SCB02_06145                                                 | 0.0109 | 0.0188 | - |
| 498001380 | two-component system response regulator                                          | 0.0103 | 0.0117 | - |
| 498001439 | prohibitin family protein                                                        | 0.0046 | 0.0019 | - |
| 498001448 | hypothetical protein SCB02_06272                                                 | 0.0157 | 0.0201 | - |
| 498001464 | Type II alternative RNA polymerase sigma factor, sigma-70 family protein         | 0.0012 | 0.0013 | - |
| 498001537 | hypothetical protein SCB02_06462                                                 | 0.0042 | 0.0045 | - |
| 498001605 | CPA1 family Na <sup>+</sup> /H <sup>+</sup> antiporter                           | 0.0063 | 0.0066 | - |
| 498001632 | TRAP-T family tripartite transporter                                             | 0.0075 | 0.0037 | - |
| 498001658 | hypothetical protein SCB02_06747                                                 | 0.0063 | 0.0096 | - |
| 498001671 | ABC transporter                                                                  | 0.006  | 0.0036 | - |
| 498001673 | hypothetical protein SCB02_06782                                                 | 0.0028 | 0.0035 | - |
| 498001708 | RNA polymerase sigma factor, sigma-70 family protein                             | 0.0017 | 0.001  | - |
| 498001710 | hypothetical protein SCB02_06856                                                 | 0.0115 | 0.0073 | - |
| 498001725 | putative DNA repair ATPase                                                       | 0.0016 | 0.001  | - |
| 498001726 | DNA repair exonuclease                                                           | 0.0036 | 0.0017 | - |
| 498001746 | cytochrome c oxidase subunit I                                                   | 0.0012 | 0.0016 | - |
| 498001750 | flavoprotein related to choline dehydrogenase                                    | 0.0029 | 0.0025 | - |
| 498001783 | hypothetical protein SCB02_07041                                                 | 0.002  | 0.0029 | - |
| 498001786 | hypothetical protein SCB02_07046                                                 | 0.001  | 0.0014 | - |
| 498001790 | neuromedin U                                                                     | 0.0029 | 0.0012 | - |
| 498001797 | regulatory proteins, Crp family protein                                          | 0.0235 | 0.037  | - |
| 498001801 | ferritin                                                                         | 0.0068 | 0.0058 | - |
| 498001806 | Beta-lactamase-like protein                                                      | 0.0032 | 0.0014 | - |
| 498001808 | SAM-dependent methyltransferase                                                  | 0.0039 | 0.0082 | - |
| 498001810 | transcriptional regulator                                                        | 0.0054 | 0.0081 | - |
| 498001812 | hypothetical protein SCB02_07126                                                 | 0.0336 | 0.0221 | - |
| 498001814 | hypothetical protein SCB02_07131                                                 | 0.004  | 0.0039 | - |
| 498001857 | metallo-beta-lactamase superfamily hydrolase                                     | 0.0061 | 0.0045 | - |
| 498001867 | asparagine synthase                                                              | 0.0027 | 0.0016 | - |
| 498001923 | hypothetical protein SCB02_07393                                                 | 0.0033 | 0.0045 | - |
| 498001960 | dienelactone hydrolase                                                           | 0.0049 | 0.0037 | - |
| 498002007 | putative cytochrome P450                                                         | 0.0068 | 0.0192 | - |
| 498002045 | porin-like protein                                                               | 0.0757 | 0.1048 | - |
| 498002386 | hypothetical protein SCB02_08510                                                 | 0.008  | 0.0082 | - |
| 498002405 | hypothetical protein SCB02_08575                                                 | 0.0442 | 0.0452 | - |
| 498002416 | VIC family potassium channel protein                                             | 0.0119 | 0.0081 | - |
| 498002417 | light-independent protochlorophyllide reductase subunit N                        | 0.0175 | 0.0128 | - |
| 498002428 | hypothetical protein SCB02_08655                                                 | 0.0049 | 0.0033 | - |
| 498002454 | creatininase                                                                     | 0.0033 | 0.004  | - |
| 498002463 | hypothetical protein SCB02_08755                                                 | 0.0183 | 0.0134 | - |
| 498002493 | ribosome recycling factor                                                        | 0.036  | 0.0202 | - |
| 498002506 | hypothetical protein SCB02_08860                                                 | 0.0025 | 0.0013 | - |
| 498002512 | hypothetical protein SCB02_08875                                                 | 0.0081 | 0.0072 | - |
| 498002520 | putative photosystem II reaction center Psb27 protein                            | 0.0264 | 0.0193 | - |
| 498002525 | single-stranded DNA-binding protein                                              | 0.0109 | 0.0105 | - |
| 498002542 | hypothetical protein SCB02_08965                                                 | 0.0103 | 0.0071 | - |
| 498002543 | hypothetical protein SCB02_08970                                                 | 0.0092 | 0.008  | - |
| 498002558 | hypothetical protein SCB02_09025                                                 | 0.0083 | 0.014  | - |
| 498002559 | putative pterin-4-alpha-carbinolamine dehydratase                                | 0.0094 | 0.0095 | - |
| 498002560 | asparagine synthase (glutamine-hydrolyzing)                                      | 0.0121 | 0.0158 | - |
| 498002561 | ATP-dependent Clp protease, Hsp 100, ATP-binding subunit ClpB                    | 0.004  | 0.0052 | - |
| 498002574 | hypothetical protein SCB02_09090                                                 | 0.0071 | 0.0029 | - |
| 498002607 | photosystem II protein D1                                                        | 0.0746 | 0.0655 | - |
| 498002612 | zinc transporter ZupT                                                            | 0.0085 | 0.0047 | - |
| 498002613 | hypothetical protein SCB02_09235                                                 | 0.0056 | 0.0032 | - |
| 498002647 | methionine-S-sulfoxide reductase                                                 | 0.0084 | 0.0075 | - |
| 498002650 | hypothetical protein SCB02_09400                                                 | 0.0036 | 0.0069 | - |
| 498002652 | anthranilate phosphoribosyltransferase                                           | 0.0101 | 0.0058 | - |
| 498002656 | hypothetical protein SCB02_09420                                                 | 0.0067 | 0.0081 | - |
| 498002679 | hypothetical protein SCB02_09505                                                 | 0.0035 | 0.0027 | - |
| 498002694 | pyruvate dehydrogenase E1 beta subunit                                           | 0.0199 | 0.0147 | - |
| 498002717 | hypothetical protein SCB02_09622                                                 | 0.0096 | 0.0063 | - |
| 498002719 | allophycocyanin subunit beta                                                     | 0.0252 | 0.0133 | - |
| 498002739 | DevA-like ABC transporter ATPase component                                       | 0.0058 | 0.0049 | - |
| 498002756 | hypothetical protein SCB02_09727                                                 | 0.0068 | 0.0074 | - |
| 498002764 | putative carboxypeptidase                                                        | 0.0035 | 0.0021 | - |
| 498002767 | hypothetical protein SCB02_09777                                                 | 0.0077 | 0.004  | - |
| 498002780 | 6-phosphogluconate dehydrogenase                                                 | 0.0026 | 0.0027 | - |
| 498002782 | putative 6-phosphogluconolactonase (DevB, Pgl)                                   | 0.0038 | 0.0027 | - |
| 498002783 | hypothetical protein SCB02_09832                                                 | 0.0655 | 0.1034 | - |
| 498002801 | hypothetical protein SCB02_09897                                                 | 0.0316 | 0.0355 | - |
| 498002809 | uridine kinase                                                                   | 0.0024 | 0.0029 | - |
| 498002814 | bifunctional adenosylcobalamin biosynthesis protein (adenosylcobinamide kinase / | 0.0084 | 0.0102 | - |
| 498002816 | hypothetical protein SCB02_09947                                                 | 0.0168 | 0.0141 | - |
| 498002819 | hypothetical protein SCB02_09962                                                 | 0.0121 | 0.0126 | - |
| 498002842 | epimerase, PhzC/PhzF-like protein                                                | 0.0029 | 0.0015 | - |
| 498002844 | NAD(P)H-dependent glycerol-3-phosphate dehydrogenase                             | 0.0063 | 0.0078 | - |
| 498002846 | hypothetical protein SCB02_10047                                                 | 0.0179 | 0.0392 | - |
| 498002898 | DnaB-like helicase                                                               | 0.0066 | 0.0038 | - |
| 498002909 | peptidylprolyl isomerase                                                         | 0.0089 | 0.0038 | - |



|           |                                                                       |        |        |   |
|-----------|-----------------------------------------------------------------------|--------|--------|---|
| 498002910 | 5'-methylthioadenosine phosphorylase                                  | 0.0052 | 0.0033 | - |
| 498002912 | hypothetical protein SCB02_10219                                      | 0.0041 | 0.0047 | - |
| 498002931 | hypothetical protein SCB02_10274                                      | 0.0212 | 0.0152 | - |
| 498002935 | hypothetical protein SCB02_10284                                      | 0.0035 | 0.0087 | - |
| 498002936 | heat shock protein 90                                                 | 0.0063 | 0.0068 | - |
| 498002946 | hypothetical protein SCB02_10319                                      | 0.0035 | 0.0021 | - |
| 498002951 | glycerol kinase                                                       | 0.0031 | 0.0017 | - |
| 498002952 | small mechanosensitive ion channel                                    | 0.0053 | 0.0046 | - |
| 498002963 | glycosyl transferase, group 2 family protein                          | 0.0036 | 0.0022 | - |
| 498002966 | hypothetical protein SCB02_10389                                      | 0.0037 | 0.0042 | - |
| 498002988 | hypothetical protein SCB02_10459                                      | 0.0033 | 0.0024 | - |
| 498002991 | hypothetical protein SCB02_10474                                      | 0.0028 | 0.0028 | - |
| 498003031 | hypothetical protein SCB02_10556                                      | 0.0016 | 0.0016 | - |
| 498003033 | hypothetical protein SCB02_10561                                      | 0.0038 | 0.0044 | - |
| 498003043 | putative Zn peptidase                                                 | 0.0048 | 0.0025 | - |
| 498003050 | ATPase                                                                | 0.0032 | 0.0032 | - |
| 498003059 | hypothetical protein SCB02_10651                                      | 0.008  | 0.0042 | - |
| 498003061 | SAM-dependent methyltransferase                                       | 0.0016 | 0.0012 | - |
| 498003064 | hypothetical protein SCB02_10671                                      | 0.0103 | 0.0059 | - |
| 498003084 | hypothetical protein SCB02_10736                                      | 0.0126 | 0.0207 | - |
| 498003088 | FtsH ATP-dependent protease-like protein                              | 0.0095 | 0.0059 | - |
| 498003098 | hypothetical protein SCB02_10781                                      | 0.1285 | 0.0826 | - |
| 498003102 | ATP-dependent Clp protease adaptor                                    | 0.011  | 0.013  | - |
| 498003156 | hypothetical protein SCB02_10906                                      | 0.0034 | 0.0066 | - |
| 498003157 | hypothetical protein SCB02_10911                                      | 0.0032 | 0.0028 | - |
| 498003159 | hypothetical protein SCB02_10921                                      | 0.005  | 0.0024 | - |
| 498003163 | phosphoribosylaminoimidazole carboxylase ATPase subunit               | 0.0033 | 0.0015 | - |
| 498003168 | hypothetical protein SCB02_10951                                      | 0.0233 | 0.0259 | - |
| 498003169 | hypothetical protein SCB02_10956                                      | 0.0174 | 0.0134 | - |
| 498003229 | CBS                                                                   | 0.0125 | 0.0063 | - |
| 498003234 | nucleotide sugar epimerase                                            | 0.0067 | 0.0035 | - |
| 498003243 | hypothetical protein SCB02_11111                                      | 0.0042 | 0.0032 | - |
| 498003245 | fumarate hydratase                                                    | 0.0048 | 0.006  | - |
| 498003278 | 3-isopropylmalate dehydrogenase                                       | 0.0108 | 0.0101 | - |
| 498003324 | hypothetical protein SCB02_11346                                      | 0.0147 | 0.006  | - |
| 498003334 | putative modulator of DNA gyrase                                      | 0.004  | 0.0025 | - |
| 498003373 | hypothetical protein SCB02_11511                                      | 0.0047 | 0.0043 | - |
| 498003374 | ABC-type cobalt transport system, ATPase component                    | 0.0036 | 0.0029 | - |
| 498003377 | hypothetical protein SCB02_11531                                      | 0.0181 | 0.0074 | - |
| 498003384 | small-conductance mechanosensitive channel                            | 0.0024 | 0.0018 | - |
| 498003387 | ribonucleotide reductase                                              | 0.0035 | 0.0033 | - |
| 498003397 | hypothetical protein SCB02_11581                                      | 0.0043 | 0.0093 | - |
| 498003399 | chologylglycine hydrolase                                             | 0.0025 | 0.0061 | - |
| 498003530 | hypothetical protein SCB02_11898                                      | 0.0032 | 0.0072 | - |
| 498003532 | hypothetical protein SCB02_11903                                      | 0.0027 | 0.0043 | - |
| 498003543 | ATLS1-like light-inducible protein                                    | 0.0088 | 0.0048 | - |
| 498003576 | hypothetical protein SCB02_12058                                      | 0.008  | 0.0107 | - |
| 498003579 | glutathione reductase (NADPH)                                         | 0.0061 | 0.0048 | - |
| 498003582 | glutathione S-transferase                                             | 0.0033 | 0.0035 | - |
| 498003591 | putative universal stress protein f                                   | 0.0016 | 0.0052 | - |
| 498003592 | hypothetical protein SCB02_12128                                      | 0.0034 | 0.0036 | - |
| 498003593 | hypothetical protein SCB02_12133                                      | 0.004  | 0.0073 | - |
| 498003603 | selenophosphate synthase/FAD/NAD(P)-binding domain-containing protein | 0.002  | 0.0017 | - |
| 498003609 | hypothetical protein SCB02_12215                                      | 0.0039 | 0.0075 | - |
| 498003611 | major facilitator superfamily permease / multidrug efflux transporter | 0.0041 | 0.0056 | - |
| 498003622 | CHAD domain containing protein                                        | 0.0051 | 0.0044 | - |
| 498003627 | porin                                                                 | 0.0476 | 0.0613 | - |
| 498003632 | rubredoxin                                                            | 0.0123 | 0.0205 | - |
| 498003634 | reductase                                                             | 0.0386 | 0.0479 | - |
| 498003635 | hypothetical protein SCB02_12345                                      | 0.0221 | 0.0388 | - |
| 498003638 | cation transport ATPase                                               | 0.0022 | 0.0019 | - |
| 498003661 | carotenoid isomerase                                                  | 0.0068 | 0.0046 | - |
| 498003663 | hypothetical protein SCB02_12487                                      | 0.0213 | 0.0178 | - |
| 498003664 | hypothetical protein SCB02_12492                                      | 0.0084 | 0.0066 | - |
| 498003666 | hypothetical protein SCB02_12502                                      | 0.0267 | 0.0228 | - |
| 498003692 | PsbP                                                                  | 0.0169 | 0.0086 | - |
| 498003707 | hypothetical protein SCB02_12717                                      | 0.0033 | 0.0087 | - |
| 498003755 | putative sn-glycerol-3-phosphate ABC transporter, permease protein    | 0.0037 | 0.0106 | - |
| 498003757 | hypothetical protein SCB02_12967                                      | 0.0094 | 0.0081 | - |
| 498003759 | Fe-S oxidoreductase                                                   | 0.0018 | 0.0014 | - |
| 498003760 | lycopene cyclase (CrtL-type)                                          | 0.0033 | 0.0036 | - |
| 498003765 | thioredoxin                                                           | 0.018  | 0.0084 | - |
| 498003777 | cytochrome cM                                                         | 0.0116 | 0.0101 | - |
| 498003787 | SufE protein                                                          | 0.0045 | 0.0027 | - |
| 498003799 | hypothetical protein SCB02_13119                                      | 0.0102 | 0.0175 | - |
| 498003817 | hypothetical protein SCB02_13194                                      | 0.0262 | 0.014  | - |
| 498003864 | putative multidrug efflux ABC transporter                             | 0.0216 | 0.027  | - |
| 498003866 | protoheme IX farnesyltransferase                                      | 0.0179 | 0.0234 | - |
| 498003870 | putative cytochrome c oxidase, subunit 2                              | 0.0215 | 0.0178 | - |
| 498003872 | cytochrome c oxidase, subunit I                                       | 0.0181 | 0.0136 | - |
| 498003906 | ABC transporter ATP-binding protein                                   | 0.0065 | 0.0048 | - |
| 498003923 | putative inner membrane protein translocase component YidC            | 0.0122 | 0.0104 | - |
| 498003928 | spectrin repeat-containing protein                                    | 0.0153 | 0.0105 | - |
| 498003929 | hypothetical protein SCB02_13521                                      | 0.0084 | 0.0027 | - |
| 498003937 | UDP-N-acetylmuramoylalanine-D-glutamate--2,6-diaminopimelate ligase   | 0.0043 | 0.0019 | - |
| 498003953 | pentapeptide repeat-containing protein                                | 0.0045 | 0.0038 | - |
| 498003963 | (dimethylallyl)adenosine tRNA methyltransferase                       | 0.0052 | 0.0039 | - |
| 498003987 | hypothetical protein SCB02_13711                                      | 0.0013 | 0.0084 | - |
| 498003992 | glycyl-tRNA synthetase subunit alpha                                  | 0.0166 | 0.0118 | - |
| 498004010 | hypothetical protein SCB02_13759                                      | 0.0118 | 0.0068 | - |

Table S4. Gene expression ratios in the *Pelagibacter* sp. HTCC7211 bin.

| NCBI GI   | Protein Description                                                            | Mean Expression Ratio (FL) | Mean Expression Ratio (PA) | PA Regulation |
|-----------|--------------------------------------------------------------------------------|----------------------------|----------------------------|---------------|
| 495819520 | DNA-directed RNA polymerase, beta' subunit                                     | 0.0114                     | 0.0456                     | Up            |
| 495819535 | cytochrome c oxidase, subunit II                                               | 0.0183                     | 0.0947                     | Up            |
| 495819590 | tRNA uridine 5-carboxymethylaminomethyl modification enzyme GidA               | 0.0537                     | 0.8066                     | Up            |
| 495819592 | glycine betaine transport ATP-binding protein opuAA                            | 0.0026                     | 0.0196                     | Up            |
| 495819601 | general amino acid ABC transporter, ATP-binding protein                        | 0.0037                     | 0.0778                     | Up            |
| 495819605 | ATP-dependent Zn protease                                                      | 0.0142                     | 0.0398                     | Up            |
| 495819621 | Receptor family ligand binding domain protein                                  | 0.058                      | 0.1563                     | Up            |
| 495819635 | 2-isopropylmalate synthase                                                     | 0.3554                     | 3.2775                     | Up            |
| 495819639 | chaperone protein DnaK                                                         | 0.0231                     | 0.1487                     | Up            |
| 495819692 | 3-hydroxyacyl-CoA dehydrogenase                                                | 0.0058                     | 0.0458                     | Up            |
| 495819722 | integral membrane protein                                                      | 0.0692                     | 0.5633                     | Up            |
| 495819728 | serine hydroxymethyltransferase                                                | 0.0075                     | 0.0468                     | Up            |
| 495819738 | HflK protein                                                                   | 0.0227                     | 0.1614                     | Up            |
| 495819741 | acyl carrier protein                                                           | 0.0928                     | 0.293                      | Up            |
| 495819758 | translation elongation factor G                                                | 0.0175                     | 0.0527                     | Up            |
| 495819798 | cytochrome-c oxidase                                                           | 0.0817                     | 0.5174                     | Up            |
| 495819802 | alanyl-tRNA synthetase                                                         | 0.0013                     | 0.0063                     | Up            |
| 495819841 | glutamine synthetase, catalytic domain, putative                               | 0.035                      | 0.0827                     | Up            |
| 495819850 | trap dicarboxylate transporter - dctp subunit                                  | 0.0678                     | 0.4403                     | Up            |
| 495819874 | citrate (si)-synthase                                                          | 0.0067                     | 0.0329                     | Up            |
| 495819902 | ribosomal protein L2                                                           | 0.0121                     | 0.0645                     | Up            |
| 495819920 | pirin                                                                          | 0.0094                     | 0.0766                     | Up            |
| 495819927 | DNA-directed RNA polymerase, alpha subunit                                     | 0.0201                     | 0.068                      | Up            |
| 495819970 | glutamate synthase large subunit                                               | 0.0154                     | 0.0478                     | Up            |
| 495819989 | acid tolerance regulatory protein actr                                         | 0.0111                     | 0.3769                     | Up            |
| 495820016 | cell division protein FtsZ                                                     | 0.0097                     | 0.0334                     | Up            |
| 495820052 | heat shock protein HslVU, ATPase subunit HslU                                  | 0.003                      | 0.0376                     | Up            |
| 495820074 | Bacterial extracellular solute-binding protein, family 7                       | 0.0507                     | 0.1481                     | Up            |
| 495820146 | GTP cyclohydrolase I                                                           | 0.0104                     | 0.0589                     | Up            |
| 495820147 | NAD(p) transhydrogenase subunit beta                                           | 0.1718                     | 3.2063                     | Up            |
| 495820166 | alanine dehydrogenase                                                          | 0.0091                     | 0.0805                     | Up            |
| 495820193 | translation elongation factor Tu                                               | 0.1686                     | 0.331                      | Up            |
| 495820205 | H <sup>+</sup> -transporting two-sector ATPase (subunit b)                     | 0.0041                     | 0.0556                     | Up            |
| 495820243 | import inner membrane translocase, subunit Tim44                               | 0.0049                     | 0.0455                     | Up            |
| 495820250 | taurine transport system periplasmic protein                                   | 0.0515                     | 0.221                      | Up            |
| 495820272 | OmpA family protein                                                            | 0.055                      | 0.4371                     | Up            |
| 495820285 | malate synthase                                                                | 0.0009                     | 0.02                       | Up            |
| 495820304 | ABC proline/glycine betaine transporter, periplasmic substrate-binding protein | 0.0179                     | 0.075                      | Up            |
| 495820329 | heAt shock protein a                                                           | 0.0752                     | 1.3574                     | Up            |
| 495820360 | substrate-binding region of ABC-type glycine betaine transport system          | 0.0625                     | 0.2092                     | Up            |
| 495820365 | ABC transporter                                                                | 0.0526                     | 0.1471                     | Up            |
| 495820376 | spermidine/putrescine-binding periplasmic protein                              | 0.1081                     | 0.3382                     | Up            |
| 495820390 | translation initiation factor IF-2                                             | 0.0029                     | 0.021                      | Up            |
| 495820391 | ATP-dependent protease La                                                      | 0.0047                     | 0.032                      | Up            |
| 495820433 | DNA-directed RNA polymerase, beta subunit                                      | 0.0113                     | 0.0274                     | Up            |
| 495820456 | ABC transporter, QAT family, substrate-binding protein, putative               | 0.0124                     | 0.0423                     | Up            |
| 495820460 | carbamoyl-phosphate synthase, large subunit                                    | 0.0031                     | 0.0115                     | Up            |
| 495820606 | glutamine synthetase, type III                                                 | 0.0034                     | 0.0172                     | Up            |
| 495820631 | leucyl aminopeptidase                                                          | 0.0042                     | 0.0186                     | Up            |
| 495820666 | NADH dehydrogenase (quinone), D subunit                                        | 0.0104                     | 0.063                      | Up            |
| 495820681 | ribosomal protein S11                                                          | 0.0211                     | 0.0957                     | Up            |
| 495820706 | betaine-aldehyde dehydrogenase                                                 | 0.0014                     | 0.0083                     | Up            |
| 495820716 | co-chaperone GrpE                                                              | 0.0052                     | 0.0779                     | Up            |
| 495820729 | Integral membrane protein DUF6                                                 | 0.0685                     | 0.8739                     | Up            |
| 495820782 | non-specific DNA-binding protein HBSu                                          | 0.1866                     | 0.611                      | Up            |
| 495820856 | thioredoxin-disulfide reductase                                                | 0.0107                     | 0.0638                     | Up            |
| 495820892 | permease                                                                       | 0.0024                     | 0.0362                     | Up            |
| 495820976 | triose-phosphate isomerase                                                     | 0.02                       | 0.3099                     | Up            |
| 495821028 | extracellular solute-binding protein, family 5                                 | 0.0159                     | 0.0739                     | Up            |
| 495821044 | putative permease, major facilitator superfamily                               | 0.004                      | 0.0156                     | Up            |
| 495821048 | protease DO                                                                    | 0.0105                     | 0.0469                     | Up            |
| 495821054 | 30S ribosomal protein S1                                                       | 0.015                      | 0.0487                     | Up            |
| 495821062 | protein RecA                                                                   | 0.0188                     | 0.1162                     | Up            |
| 495821077 | ATP synthase F1, alpha subunit                                                 | 0.0188                     | 0.0984                     | Up            |
| 495821094 | H <sup>+</sup> -transporting two-sector ATPase (subunit b)                     | 0.0388                     | 0.1869                     | Up            |
| 495821103 | xanthine/uracil/vitamin C permease family protein                              | 0.109                      | 0.2955                     | Up            |
| 495821111 | smc protein                                                                    | 0.0021                     | 0.0128                     | Up            |
| 495821156 | ATP-binding component of ABC transporter                                       | 0.0058                     | 0.0572                     | Up            |
| 495821159 | chaperonin GroL                                                                | 0.0431                     | 0.4632                     | Up            |
| 495821160 | ribosomal protein S4                                                           | 0.0072                     | 0.032                      | Up            |
| 495821187 | ABC transporter                                                                | 0.1852                     | 0.7251                     | Up            |
| 495821262 | oxidoreductase, aldo/keto reductase family                                     | 0.0021                     | 0.0171                     | Up            |
| 495821376 | tartrate dehydrogenase                                                         | 0.0033                     | 0.0278                     | Up            |
| 495821387 | catalase/peroxidase HPI                                                        | 0.0202                     | 0.1227                     | Up            |
| 495821393 | formate dehydrogenase, alpha subunit                                           | 0.0064                     | 0.019                      | Up            |
| 495821415 | polyribonucleotide nucleotidyltransferase                                      | 0.0119                     | 0.0488                     | Up            |
| 495821419 | conserved hypothetical protein                                                 | 0.0111                     | 0.0651                     | Up            |
| 495821420 | alternative sigma factor RpoH                                                  | 0.0044                     | 0.0465                     | Up            |
| 495821440 | cytochrome B/c1                                                                | 0.0109                     | 0.0422                     | Up            |
| 495821487 | transcription termination factor Rho                                           | 0.0067                     | 0.026                      | Up            |
| 495821508 | aminomethyltransferase, glycyl cleavage system T protein                       | 0.0462                     | 0.1439                     | Up            |
| 495821524 | V-type H <sup>(+)</sup> -translocating pyrophosphatase                         | 0.0698                     | 0.132                      | Up            |
| 495821537 | chaperone protein DnaJ                                                         | 0.0048                     | 0.0505                     | Up            |
| 495821544 | ammonium transporter family protein                                            | 0.0633                     | 0.6174                     | Up            |
| 495819481 | ATP synthase F0, A subunit                                                     | 0.0139                     | 0.0366                     | -             |
| 495819485 | gxgxm motif-containing protein                                                 | 0.0109                     | 0.0219                     | -             |
| 495819490 | FoIC bifunctional protein                                                      | 0.011                      | 0.0576                     | -             |
| 495819493 | Na <sup>+</sup> /H <sup>+</sup> antiporter NhaA                                | 0.007                      | 0.0119                     | -             |

|           |                                                                                         |        |        |   |
|-----------|-----------------------------------------------------------------------------------------|--------|--------|---|
| 495819498 | glutamyl-tRNA(Gln) amidotransferase subunit A                                           | 0.0043 | 0.014  | - |
| 495819500 | ribosomal protein L14                                                                   | 0.0123 | 0.0383 | - |
| 495819503 | acetyl-CoA carboxylase, biotin carboxylase                                              | 0.0073 | 0.0103 | - |
| 495819511 | spermidine/putrescine transport system permease protein potb                            | 0.0043 | 0.0215 | - |
| 495819525 | phosphoribosylformylglycinamide synthase II                                             | 0.0026 | 0.0051 | - |
| 495819529 | histidyl-tRNA synthetase                                                                | 0.0038 | 0.0094 | - |
| 495819532 | ABC-type branched-chain amino acid transport system, permease protein I                 | 0.006  | 0.0367 | - |
| 495819536 | phenylalanyl-tRNA synthetase, beta subunit                                              | 0.0008 | 0.0061 | - |
| 495819537 | nucleotidyltransferase/DNA polymerase involved in DNA repair/SOS mutagenesis and repair | 0.0012 | 0.0028 | - |
| 495819541 | NAD+ synthetase                                                                         | 0.0043 | 0.0214 | - |
| 495819551 | ribosomal protein L20                                                                   | 0.0075 | 0.0174 | - |
| 495819557 | NADH dehydrogenase i chain a                                                            | 0.0168 | 0.1133 | - |
| 495819573 | ABC transporter, membrane spanning protein (glycine betaine)                            | 0.0055 | 0.0182 | - |
| 495819597 | putative coenzyme F420-reducing hydrogenase, beta subunit family protein                | 0.0019 | 0.0025 | - |
| 495819598 | prolyl-tRNA synthetase                                                                  | 0.003  | 0.0054 | - |
| 495819617 | conserved hypothetical protein TIGR00701                                                | 0.0011 | 0.0073 | - |
| 495819640 | acetyl-CoA carboxylase, carboxyl transferase, alpha subunit                             | 0.0029 | 0.0054 | - |
| 495819641 | pyruvate, phosphate dikinase                                                            | 0.0022 | 0.0075 | - |
| 495819643 | glycine betaine/L-proline transport system permease                                     | 0.0043 | 0.0054 | - |
| 495819675 | putative 3-hydroxyisobutyrate dehydrogenase                                             | 0.0014 | 0.0073 | - |
| 495819684 | tryptophanyl-tRNA synthetase                                                            | 0.0039 | 0.0128 | - |
| 495819686 | glutamate synthase, large subunit                                                       | 0.0014 | 0.0032 | - |
| 495819688 | glutamine synthetase, type I                                                            | 0.0134 | 0.0327 | - |
| 495819691 | type II Secretion PilQ                                                                  | 0.0259 | 0.0853 | - |
| 495819702 | signal recognition particle protein                                                     | 0.0035 | 0.0085 | - |
| 495819705 | methylenetetrahydrofolate reductase                                                     | 0.0235 | 0.037  | - |
| 495819720 | ATP synthase F1, gamma subunit                                                          | 0.004  | 0.007  | - |
| 495819724 | ammonium transporter family protein                                                     | 0.0026 | 0.0124 | - |
| 495819727 | branched-chain amino acid transport system/permease component                           | 0.0046 | 0.0087 | - |
| 495819731 | preprotein translocase SecG subunit                                                     | 0.0197 | 0.0251 | - |
| 495819753 | 5-methylcytosine-specific restriction enzyme A                                          | 0.0038 | 0.0196 | - |
| 495819755 | pyruvate dehydrogenase (acetyl-transferring), homodimeric type                          | 0.0033 | 0.0058 | - |
| 495819765 | trigger factor                                                                          | 0.0022 | 0.0069 | - |
| 495819766 | DNA primase                                                                             | 0.0016 | 0.0044 | - |
| 495819768 | flavin-containing monooxygenase FMO                                                     | 0.0048 | 0.0169 | - |
| 495819780 | 2-isopropylmalate synthase/homocitrate synthase family protein                          | 0.0014 | 0.0081 | - |
| 495819788 | type 4 fibrillar biogenesis protein PilP                                                | 0.0775 | 0.1379 | - |
| 495819799 | succinate dehydrogenase, flavoprotein subunit                                           | 0.0039 | 0.0096 | - |
| 495819822 | ribosomal protein S21                                                                   | 0.0149 | 0.0428 | - |
| 495819823 | amidophosphoribosyltransferase                                                          | 0.0029 | 0.0057 | - |
| 495819826 | choline dehydrogenase                                                                   | 0.0016 | 0.0077 | - |
| 495819827 | electron transfer flavoprotein-ubiquinone oxidoreductase                                | 0.0034 | 0.0043 | - |
| 495819854 | formate--tetrahydrofolate ligase                                                        | 0.0043 | 0.018  | - |
| 495819856 | ribonucleoside-diphosphate reductase, beta subunit                                      | 0.0148 | 0.0242 | - |
| 495819857 | glutamyl-tRNA synthetase                                                                | 0.0019 | 0.0042 | - |
| 495819876 | galactarate dehydratase, putative                                                       | 0.03   | 0.0465 | - |
| 495819901 | 30S ribosomal protein S16                                                               | 0.0187 | 0.0279 | - |
| 495819904 | tRNA (guanine-N1)-methyltransferase                                                     | 0.0092 | 0.0364 | - |
| 495819931 | RNA polymerase sigma factor                                                             | 0.0058 | 0.0091 | - |
| 495819935 | glycine amidinotransferase                                                              | 0.0018 | 0.0097 | - |
| 495819939 | segregation and condensation protein B                                                  | 0.0025 | 0.0209 | - |
| 495819948 | nitrogen-fixing NifU domain protein                                                     | 0.0032 | 0.0229 | - |
| 495819949 | acetate--CoA ligase                                                                     | 0.0049 | 0.0047 | - |
| 495819951 | dna-directed rna polymerase omega subunit                                               | 0.0114 | 0.036  | - |
| 495819966 | hydroxyacylglutathione hydrolase                                                        | 0.0028 | 0.0326 | - |
| 495819968 | mannitol transporter                                                                    | 0.0182 | 0.0202 | - |
| 495819974 | conserved hypothetical protein                                                          | 0.0065 | 0.0447 | - |
| 495819983 | ribosomal protein S3                                                                    | 0.0085 | 0.0074 | - |
| 495819987 | 3-demethylubiquinone-9 3-O-methyltransferase                                            | 0.0017 | 0.0109 | - |
| 495819988 | probable NADH-ubiquinone oxidoreductase                                                 | 0.0012 | 0.0047 | - |
| 495820000 | ribonuclease E/G                                                                        | 0.0012 | 0.0079 | - |
| 495820003 | ribosomal protein S2                                                                    | 0.0092 | 0.0359 | - |
| 495820035 | histidine triad protein                                                                 | 0.0014 | 0.0088 | - |
| 495820048 | gamma-butyrobetaine,2-oxoglutarate dioxygenase, putative transporter                    | 0.001  | 0.0058 | - |
| 495820064 | nucleoside diphosphate kinase                                                           | 0.0405 | 0.0496 | - |
| 495820075 | nucleoside diphosphate kinase                                                           | 0.0025 | 0.0101 | - |
| 495820076 | ribonucleoside-diphosphate reductase, alpha subunit                                     | 0.0186 | 0.0324 | - |
| 495820077 | thiamine pyrophosphate-requiring enzyme                                                 | 0.0187 | 0.0152 | - |
| 495820079 | anthranilate phosphoribosyltransferase                                                  | 0.0019 | 0.0096 | - |
| 495820099 | argininosuccinate synthase                                                              | 0.0012 | 0.0059 | - |
| 495820101 | ribosomal protein S13p/S18e                                                             | 0.0412 | 0.2372 | - |
| 495820103 | CarD-like transcriptional regulator family protein                                      | 0.0063 | 0.0236 | - |
| 495820105 | D-galactarate dehydratase/Altronate                                                     | 0.0151 | 0.0331 | - |
| 495820109 | methylenetetrahydrofolate dehydrogenase                                                 | 0.006  | 0.0152 | - |
| 495820111 | malate dehydrogenase, NAD-dependent                                                     | 0.005  | 0.0324 | - |
| 495820118 | transporter, major facilitator family                                                   | 0.0009 | 0.0055 | - |
| 495820126 | adenylsulfate kinase                                                                    | 0.0269 | 0.0361 | - |
| 495820129 | phosphoribosylformylglycinamide synthase I                                              | 0.0046 | 0.0087 | - |
| 495820131 | conserved hypothetical protein                                                          | 0.0035 | 0.008  | - |
| 495820133 | protein TolQ                                                                            | 0.0158 | 0.034  | - |
| 495820134 | phosphate acetyltransferase                                                             | 0.0017 | 0.0176 | - |
| 495820137 | 2,3,4,5-tetrahydropyridine-2,6-dicarboxylate N-succinyltransferase                      | 0.0058 | 0.0152 | - |
| 495820138 | exodeoxyribonuclease I                                                                  | 0.0023 | 0.0108 | - |
| 495820140 | sodium Bile symporter family protein                                                    | 0.0089 | 0.0081 | - |
| 495820141 | glycine betaine/L-proline transport system permease protein                             | 0.0055 | 0.0073 | - |
| 495820148 | type II Secretion PilT                                                                  | 0.0327 | 0.0237 | - |
| 495820162 | chromosome partitioning protein                                                         | 0.0041 | 0.0231 | - |
| 495820168 | preprotein translocase, SecY subunit                                                    | 0.0087 | 0.0142 | - |
| 495820175 | ATP-dependent Clp protease, ATP-binding subunit ClpX                                    | 0.0085 | 0.0177 | - |
| 495820177 | UDP-3-O-(3-hydroxymyristoyl) N-acetylglucosamine deacetylase                            | 0.0038 | 0.0118 | - |
| 495820199 | adenylsulfate reductase, alpha subunit                                                  | 0.0227 | 0.0398 | - |
| 495820201 | selenocysteine lyase chain A                                                            | 0.0028 | 0.0079 | - |
| 495820212 | Tol-Pal system beta propeller repeat protein TolB                                       | 0.0152 | 0.0185 | - |

|           |                                                                                |        |        |   |
|-----------|--------------------------------------------------------------------------------|--------|--------|---|
| 495820215 | isoleucyl-tRNA synthetase                                                      | 0.0024 | 0.009  | - |
| 495820216 | Na <sup>+</sup> /solute symporter, Ssf family                                  | 0.3479 | 0.5602 | - |
| 495820229 | conserved hypothetical protein                                                 | 0.0172 | 0.065  | - |
| 495820232 | ATP synthase F1, beta subunit                                                  | 0.0327 | 0.0893 | - |
| 495820235 | acyl-CoA synthetases (AMP-forming)/AMP-acid ligases II                         | 0.002  | 0.0086 | - |
| 495820242 | ribosomal protein L1                                                           | 0.0043 | 0.0247 | - |
| 495820249 | LexA repressor                                                                 | 0.0099 | 0.021  | - |
| 495820278 | ribosomal protein S6                                                           | 0.0051 | 0.0166 | - |
| 495820288 | ribosomal protein L16                                                          | 0.0157 | 0.084  | - |
| 495820297 | DNA uptake lipoprotein                                                         | 0.0007 | 0.0059 | - |
| 495820299 | phosphoribosylaminoimidazole-succinocarboxamide synthase                       | 0.0023 | 0.0137 | - |
| 495820303 | conserved hypothetical integral membrane protein                               | 0.0051 | 0.0256 | - |
| 495820307 | 3-oxoacyl-(acyl-carrier-protein) synthase                                      | 0.0045 | 0.025  | - |
| 495820310 | protein-export membrane protein SecD                                           | 0.0021 | 0.0137 | - |
| 495820312 | creatinase                                                                     | 0.0011 | 0.0043 | - |
| 495820326 | glycyl-tRNA synthetase, beta subunit                                           | 0.0015 | 0.0183 | - |
| 495820335 | bacteriorhodopsin                                                              | 0.8933 | 0.8271 | - |
| 495820356 | putative monomeric sarcosine oxidase                                           | 0.0168 | 0.028  | - |
| 495820369 | dihydroxy-acid dehydratase                                                     | 0.0087 | 0.0168 | - |
| 495820374 | 6-O-methylguanine DNA methyltransferase                                        | 0.0046 | 0.0225 | - |
| 495820377 | spermine/spermidine synthase                                                   | 0.0052 | 0.0128 | - |
| 495820400 | lipoprotein                                                                    | 0.0318 | 0.085  | - |
| 495820415 | integral membrane protein MvIN                                                 | 0.0016 | 0.0108 | - |
| 495820435 | 50S ribosomal protein L5                                                       | 0.0083 | 0.066  | - |
| 495820449 | DNA topoisomerase I                                                            | 0.0018 | 0.0048 | - |
| 495820452 | ribosomal protein L7/L12                                                       | 0.0424 | 0.1562 | - |
| 495820455 | homoserine O-acetyltransferase                                                 | 0.0025 | 0.0077 | - |
| 495820467 | potassium uptake protein                                                       | 0.0042 | 0.0136 | - |
| 495820469 | UDP-N-acetylmuramoylalanyl-D-glutamate                                         | 0.0015 | 0.0057 | - |
| 495820550 | dimethylglycine dehydrogenase                                                  | 0.0083 | 0.0174 | - |
| 495820564 | ketol-acid reductoisomerase                                                    | 0.0048 | 0.0184 | - |
| 495820567 | short chain dehydrogenase                                                      | 0.0017 | 0.0235 | - |
| 495820577 | mannitol transporter                                                           | 0.0033 | 0.0042 | - |
| 495820587 | threonyl-tRNA synthetase                                                       | 0.0048 | 0.0058 | - |
| 495820588 | methionine adenosyltransferase                                                 | 0.0033 | 0.0108 | - |
| 495820593 | ureidoglycolate dehydrogenase                                                  | 0.0035 | 0.0105 | - |
| 495820599 | D-amino-acid dehydrogenase small chain                                         | 0.003  | 0.0049 | - |
| 495820605 | DNA gyrase, B subunit                                                          | 0.0035 | 0.0117 | - |
| 495820615 | 3-isopropylmalate dehydratase, large subunit                                   | 0.0023 | 0.0087 | - |
| 495820620 | ribosomal protein L11                                                          | 0.0137 | 0.0728 | - |
| 495820637 | 50S ribosomal protein L19                                                      | 0.0115 | 0.0654 | - |
| 495820640 | lysine/ornithine decarboxylase                                                 | 0.002  | 0.0158 | - |
| 495820642 | LSU ribosomal protein L10P                                                     | 0.0182 | 0.0518 | - |
| 495820662 | mechanosensitive ion channel                                                   | 0.0033 | 0.007  | - |
| 495820672 | replicative DNA helicase                                                       | 0.0031 | 0.0091 | - |
| 495820702 | ribosomal protein S12                                                          | 0.0209 | 0.0843 | - |
| 495820704 | rod shape-determining protein MreB                                             | 0.0109 | 0.0289 | - |
| 495820731 | argininosuccinate lyase                                                        | 0.002  | 0.0067 | - |
| 495820732 | methylmalonate-semialdehyde dehydrogenase                                      | 0.0044 | 0.0197 | - |
| 495820740 | conserved hypothetical protein                                                 | 0.0013 | 0.0127 | - |
| 495820747 | type II Secretion PilY1                                                        | 0.0087 | 0.0144 | - |
| 495820749 | ABC transporter, permease protein                                              | 0.0027 | 0.0059 | - |
| 495820752 | acetolactate synthase, large subunit, biosynthetic type                        | 0.0013 | 0.0058 | - |
| 495820765 | excinuclease ABC, B subunit                                                    | 0.0016 | 0.0059 | - |
| 495820766 | DNA gyrase, A subunit                                                          | 0.0048 | 0.0058 | - |
| 495820774 | extracellular solute-binding protein, family 1                                 | 0.0813 | 0.3771 | - |
| 495820778 | HesB/YadR/YfhF                                                                 | 0.0031 | 0.0136 | - |
| 495820791 | sarcosine dehydrogenase                                                        | 0.0007 | 0.0027 | - |
| 495820800 | phosphopantothenoylcysteine decarboxylase/phosphopantothenate--cysteine ligase | 0.0028 | 0.0122 | - |
| 495820807 | phenylalanyl-tRNA synthetase, alpha subunit                                    | 0.0018 | 0.0107 | - |
| 495820814 | glycine dehydrogenase                                                          | 0.0039 | 0.0096 | - |
| 495820816 | L-lactate dehydrogenase                                                        | 0.0016 | 0.0074 | - |
| 495820822 | ribosomal protein L3                                                           | 0.0026 | 0.0415 | - |
| 495820835 | excinuclease ABC, A subunit                                                    | 0.0021 | 0.0109 | - |
| 495820838 | putative tricarboxylic transport TctC                                          | 0.0482 | 0.1568 | - |
| 495820842 | glycine betaine transporter, ATP-binding protein                               | 0.0032 | 0.0075 | - |
| 495820843 | TctA protein                                                                   | 0.0128 | 0.0101 | - |
| 495820847 | ammonium transporter                                                           | 0.0537 | 0.193  | - |
| 495820849 | cytochrome c oxidase, subunit I                                                | 0.0425 | 0.0635 | - |
| 495820869 | Integral membrane protein DUF6                                                 | 0.0012 | 0.0045 | - |
| 495820881 | putative pseudo-pilin PulG                                                     | 0.0914 | 0.0737 | - |
| 495820884 | DNA-directed DNA polymerase gamma/tau subunit                                  | 0.0028 | 0.0102 | - |
| 495820895 | flavin Mononucleotide Binding Protein                                          | 0.0021 | 0.005  | - |
| 495820896 | glutamyl-tRNA(gln) amidotransferase chain B                                    | 0.0023 | 0.0111 | - |
| 495820902 | amino acid ABC transporter                                                     | 0.0133 | 0.0107 | - |
| 495820907 | histone deacetylase family protein                                             | 0.0017 | 0.008  | - |
| 495820912 | quinolinate synthetase complex, A subunit                                      | 0.0043 | 0.0149 | - |
| 495820918 | ribosomal protein L6                                                           | 0.0054 | 0.0178 | - |
| 495820919 | tail-specific proteinase                                                       | 0.0019 | 0.0084 | - |
| 495820932 | hypothetical protein PB7211_1033                                               | 0.0038 | 0.0068 | - |
| 495820939 | chromosomal replication initiator protein DnaA                                 | 0.002  | 0.0096 | - |
| 495820965 | adenosylhomocysteinase                                                         | 0.0075 | 0.0473 | - |
| 495820978 | CTP synthase                                                                   | 0.0036 | 0.007  | - |
| 495820980 | ribosomal protein L25, Ctc-form                                                | 0.0236 | 0.0226 | - |
| 495820991 | glycerol kinase                                                                | 0.0016 | 0.0035 | - |
| 495820993 | putative hemimethylated DNA binding domain protein                             | 0.0096 | 0.0337 | - |
| 495821000 | NADH dehydrogenase i chain b                                                   | 0.0334 | 0.023  | - |
| 495821002 | NADH dehydrogenase (quinone), G subunit                                        | 0.0036 | 0.0135 | - |
| 495821021 | proline dipeptidase                                                            | 0.0015 | 0.008  | - |
| 495821027 | transcription termination factor                                               | 0.0074 | 0.0118 | - |
| 495821030 | penicillin-binding protein 1A                                                  | 0.0046 | 0.0076 | - |
| 495821035 | adenosylmethionine-8-amino-7-oxononanoate aminotransferase                     | 0.0058 | 0.0306 | - |
| 495821051 | conserved hypothetical protein                                                 | 0.0042 | 0.0458 | - |
| 495821059 | adenylsulfate reductase membrane anchor                                        | 0.0423 | 0.0785 | - |

|           |                                                                 |        |        |   |
|-----------|-----------------------------------------------------------------|--------|--------|---|
| 495821061 | GTP-binding protein LepA                                        | 0.0016 | 0.0049 | - |
| 495821075 | adenylosuccinate lyase                                          | 0.0037 | 0.0192 | - |
| 495821081 | ATP-dependent protease                                          | 0.0083 | 0.031  | - |
| 495821095 | single-strand binding protein family protein                    | 0.0119 | 0.0347 | - |
| 495821097 | sarcosine oxidase alpha subunit                                 | 0.0044 | 0.0102 | - |
| 495821104 | amino acid ABC transporter, permease protein                    | 0.013  | 0.0163 | - |
| 495821116 | acetyl-coenzyme A carboxylase carboxyl transferase subunit beta | 0.0058 | 0.0164 | - |
| 495821128 | aconitate hydratase 1                                           | 0.0024 | 0.0069 | - |
| 495821130 | glycine cleavage system H protein                               | 0.0093 | 0.0199 | - |
| 495821131 | ubiquinol-cytochrome c reductase, iron-sulfur subunit           | 0.0055 | 0.038  | - |
| 495821132 | delta-aminolevulinic acid dehydratase                           | 0.0037 | 0.0085 | - |
| 495821133 | conserved hypothetical protein                                  | 0.0073 | 0.0308 | - |
| 495821134 | transcription regulator                                         | 0.0039 | 0.0493 | - |
| 495821137 | ribosomal protein S20                                           | 0.0068 | 0.0417 | - |
| 495821157 | NADP-dependent malic enzyme                                     | 0.0042 | 0.0128 | - |
| 495821189 | imidazoleglycerol-phosphate dehydratase                         | 0.0072 | 0.0231 | - |
| 495821197 | 30S ribosomal protein S14                                       | 0.0146 | 0.0611 | - |
| 495821209 | O-acetylhomoserine (thiol)-lyase                                | 0.0096 | 0.02   | - |
| 495821230 | ribosomal protein L13                                           | 0.0078 | 0.0514 | - |
| 495821233 | conserved hypothetical protein                                  | 0.0618 | 0.0818 | - |
| 495821248 | ribosomal protein L35                                           | 0.0048 | 0.0517 | - |
| 495821253 | translation elongation factor Ts                                | 0.0043 | 0.0251 | - |
| 495821273 | preprotein translocase, SecA subunit                            | 0.0018 | 0.0103 | - |
| 495821291 | DNA polymerase III, alpha subunit                               | 0.0014 | 0.0065 | - |
| 495821294 | 2-polypropenylphenol 6-hydroxylase                              | 0.0008 | 0.0068 | - |
| 495821302 | acetolactate synthase, small subunit                            | 0.0036 | 0.0086 | - |
| 495821309 | isocitrate lyase                                                | 0.0023 | 0.0192 | - |
| 495821311 | outer membrane protein TolC                                     | 0.0014 | 0.0095 | - |
| 495821319 | conserved hypothetical protein                                  | 0.0054 | 0.0366 | - |
| 495821325 | muropeptide permease                                            | 0.0073 | 0.0089 | - |
| 495821331 | mom repeat protein                                              | 0.0018 | 0.0158 | - |
| 495821333 | homocysteine S-methyltransferase                                | 0.002  | 0.0029 | - |
| 495821335 | octaprenyl-diphosphate synthase                                 | 0.0034 | 0.0154 | - |
| 495821355 | glutamate synthase subunit 1                                    | 0.0132 | 0.0608 | - |
| 495821364 | tol-pal system protein YbgF, putative                           | 0.0089 | 0.0349 | - |
| 495821391 | acetyl-CoA carboxylase, biotin carboxyl carrier protein         | 0.0138 | 0.0485 | - |
| 495821403 | dihydrodipicolinate synthase                                    | 0.0033 | 0.0145 | - |
| 495821406 | cysteinyI-tRNA synthetase                                       | 0.0015 | 0.0112 | - |
| 495821409 | cytochrome c oxidase assembly protein CtaG                      | 0.0051 | 0.023  | - |
| 495821412 | sarcosine oxidase                                               | 0.0061 | 0.0176 | - |
| 495821433 | 3-deoxy-7-phosphoheptulonate synthase                           | 0.011  | 0.0477 | - |
| 495821442 | NADH oxidoreductase (quinone), F subunit                        | 0.0021 | 0.0059 | - |
| 495821454 | AcrB/AcrD/AcrF family protein                                   | 0.0047 | 0.0058 | - |
| 495821481 | chaperonin GroS                                                 | 0.0543 | 0.2835 | - |
| 495821507 | tRNA (5-methylaminomethyl-2-thiouridylate)-methyltransferase    | 0.002  | 0.0035 | - |
| 495821518 | membrane protein                                                | 0.0238 | 0.0371 | - |
| 495821519 | RIP metalloprotease RseP                                        | 0.006  | 0.0103 | - |
| 495821522 | hypothetical protein PB7211_1417                                | 0.017  | 0.0204 | - |
| 495821531 | probable integral membrane protein                              | 0.0043 | 0.0047 | - |
| 495821538 | conserved hypothetical protein                                  | 0.0084 | 0.0138 | - |
| 495821542 | sarcosine oxidase beta subunit                                  | 0.0072 | 0.0053 | - |
| 495821548 | NADH dehydrogenase i chain I                                    | 0.0043 | 0.0064 | - |
| 495821550 | glycine betaine transporter, ATP-binding protein                | 0.0042 | 0.009  | - |
| 495821560 | type II Secretion System PilC                                   | 0.018  | 0.0184 | - |
| 495821568 | metallo-beta-lactamase family protein                           | 0.002  | 0.0091 | - |

Table S5. Gene expression ratios in the gammaproteobacterium HTCC2080 bin.

| NCBI GI   | Protein Description                                                      | Mean Expression Ratio (FL) | Mean Expression Ratio (PA) | PA Regulation |
|-----------|--------------------------------------------------------------------------|----------------------------|----------------------------|---------------|
| 494440354 | hypothetical protein                                                     | 0.0154                     | 0.0868                     | Up            |
| 494440403 | dnaK protein                                                             | 0.0403                     | 0.3517                     | Up            |
| 494440409 | bifunctional isocitrate dehydrogenase kinase/phosphatase protein         | 0.0375                     | 0.3177                     | Up            |
| 494440423 | Secreted Zn-dependent peptidase, insulinase family protein               | 0.0529                     | 0.2275                     | Up            |
| 494440451 | probable acid-CoA ligase                                                 | 0.0478                     | 0.3195                     | Up            |
| 494440531 | Alpha amylase, catalytic subdomain                                       | 0.1094                     | 1.0107                     | Up            |
| 494440576 | C-terminal processing peptidase                                          | 0.0221                     | 0.1555                     | Up            |
| 494440618 | Leucyl aminopeptidase                                                    | 0.0399                     | 0.3909                     | Up            |
| 494440739 | isoquinoline 1-oxidoreductase, beta subunit                              | 0.4149                     | 2.4925                     | Up            |
| 494440758 | enoyl-CoA hydratase/isomerase family protein                             | 0.061                      | 0.7257                     | Up            |
| 494441092 | signal peptide peptidase SppA, 67K type                                  | 0.023                      | 0.0509                     | Up            |
| 494441139 | acyl-CoA synthase                                                        | 0.025                      | 0.1787                     | Up            |
| 494441143 | acyl-CoA synthase                                                        | 0.1803                     | 1.6682                     | Up            |
| 494441150 | transcriptional regulator, TetR family protein                           | 0.156                      | 1.4948                     | Up            |
| 494441152 | putative lipoprotein                                                     | 0.1305                     | 0.3226                     | Up            |
| 494441170 | putative TonB-dependent receptor                                         | 0.0562                     | 0.1313                     | Up            |
| 494441263 | invasion protein IbeA                                                    | 0.0198                     | 0.121                      | Up            |
| 494441273 | peptidase M20                                                            | 0.006                      | 0.0568                     | Up            |
| 494441340 | putative acyl coenzyme A dehydrogenase (HcaD-like) protein               | 0.0524                     | 0.2198                     | Up            |
| 494441342 | hypothetical protein                                                     | 0.0209                     | 0.2073                     | Up            |
| 494441355 | aminotransferase, class III                                              | 0.0608                     | 0.1833                     | Up            |
| 494441435 | Magnesium-chelatase, subunit H                                           | 0.0199                     | 0.2316                     | Up            |
| 494441467 | cobalt-zinc-cadmium resistance protein (CzcA)-like                       | 0.0113                     | 0.1214                     | Up            |
| 494441545 | cobalt-zinc-cadmium resistance protein (CzcA)-like                       | 0.0775                     | 0.3368                     | Up            |
| 494441547 | phosphoenolpyruvate carboxykinase (ATP)                                  | 0.1487                     | 0.9292                     | Up            |
| 494441555 | ribonucleotide-diphosphate reductase alpha subunit                       | 0.0284                     | 0.0945                     | Up            |
| 494441566 | Cell division protein FtsI/penicillin-binding protein 2                  | 1.188                      | 11.6239                    | Up            |
| 494441632 | oxidoreductase, short chain dehydrogenase/reductase family protein       | 0.105                      | 0.6064                     | Up            |
| 494441786 | acyl-CoA dehydrogenase-like protein                                      | 0.028                      | 0.0857                     | Up            |
| 494441804 | putative indolepyruvate ferredoxin oxidoreductase alpha subunit          | 0.0154                     | 0.079                      | Up            |
| 494441857 | TonB-dependent receptor                                                  | 0.0247                     | 0.1271                     | Up            |
| 494442038 | 2,4-dienoyl-CoA reductase FadH1                                          | 0.2144                     | 1.5905                     | Up            |
| 494442120 | glutathione S-transferase                                                | 0.0032                     | 0.0405                     | Up            |
| 494442294 | putative transcriptional regulator, Fis family protein                   | 0.0489                     | 0.1822                     | Up            |
| 494442514 | Acetyltransferase                                                        | 0.0083                     | 0.0724                     | Up            |
| 494442681 | helicase, ATP-dependent                                                  | 0.0068                     | 0.1158                     | Up            |
| 494442774 | hypothetical protein                                                     | 0.0252                     | 0.0736                     | Up            |
| 494442862 | Glutamate synthase domain 2                                              | 0.048                      | 0.1487                     | Up            |
| 494442911 | putative type 4 fimbrial biogenesis pily1-related protein signal peptide | 0.0367                     | 0.1738                     | Up            |
| 494443014 | L-carnitine dehydratase/bile acid-inducible protein F                    | 0.0301                     | 0.1995                     | Up            |
| 494443015 | 5-oxoprolinase (ATP-hydrolyzing)                                         | 0.0525                     | 0.4344                     | Up            |
| 494443109 | TPR domain protein                                                       | 0.012                      | 0.0414                     | Up            |
| 494443148 | acyl-CoA dehydrogenase-like protein                                      | 0.0061                     | 0.0316                     | Up            |
| 494443189 | acriflavin resistance protein                                            | 0.0089                     | 0.0685                     | Up            |
| 494440127 | protease subunit HfIC                                                    | 0.0559                     | 0.0238                     | Down          |
| 494440167 | Beta-glucosidase                                                         | 0.1017                     | 0.0507                     | Down          |
| 494440245 | Ribosomal protein L10                                                    | 1.4544                     | 0.5637                     | Down          |
| 494440247 | DNA-directed RNA polymerase subunit beta                                 | 0.2435                     | 0.1589                     | Down          |
| 494440267 | 50S ribosomal protein L5                                                 | 0.4236                     | 0.1986                     | Down          |
| 494440272 | 30S ribosomal protein S5                                                 | 0.8106                     | 0.2938                     | Down          |
| 494440275 | protein translocase subunit SecY                                         | 0.5032                     | 0.2822                     | Down          |
| 494440652 | Ankyrin                                                                  | 0.2788                     | 0.1054                     | Down          |
| 494440764 | aminotransferase, class III                                              | 0.152                      | 0.0712                     | Down          |
| 494440790 | putative unknown membrane associated protein                             | 0.0873                     | 0.0257                     | Down          |
| 494440793 | Branched-chain amino acid aminotransferase I                             | 0.2981                     | 0.1329                     | Down          |
| 494441146 | Outer membrane protein                                                   | 0.0547                     | 0.031                      | Down          |
| 494441371 | Pyridoxal-dependent decarboxylase                                        | 0.2288                     | 0.0358                     | Down          |
| 494441741 | Cytochrome oxidase assembly protein                                      | 0.067                      | 0.0155                     | Down          |
| 494442055 | formate--tetrahydrofolate ligase                                         | 0.0599                     | 0.016                      | Down          |
| 494442274 | putative TonB-dependent outer membrane receptor                          | 0.6055                     | 0.2498                     | Down          |
| 494442351 | enoyl-CoA hydratase/isomerase family protein                             | 0.0753                     | 0.0212                     | Down          |
| 494442352 | acetyl-CoA carboxylase carboxyltransferase                               | 0.0674                     | 0.0251                     | Down          |
| 494442353 | hypothetical protein                                                     | 0.07                       | 0.024                      | Down          |
| 494442365 | Flagellar biosynthesis protein FliR                                      | 0.2362                     | 0.1502                     | Down          |
| 494442593 | translation initiation factor IF-3                                       | 0.6376                     | 0.0998                     | Down          |
| 494442597 | threonyl-tRNA synthetase                                                 | 0.0645                     | 0.0274                     | Down          |
| 494442812 | protein-export protein SecB                                              | 0.1159                     | 0.0375                     | Down          |
| 494442833 | NAD(P) transhydrogenase subunit alpha                                    | 0.1068                     | 0.0314                     | Down          |
| 494442915 | Inorganic diphosphatase                                                  | 0.1243                     | 0.0813                     | Down          |
| 494443095 | Na(+)-translocating NADH-quinone reductase subunit F                     | 0.1295                     | 0.0695                     | Down          |
| 494443140 | ribosomal 5S rRNA E-loop binding protein Ctc/L25/TL5                     | 0.2073                     | 0.0469                     | Down          |
| 494440042 | ribulose-phosphate 3-epimerase                                           | 0.035                      | 0.0274                     | -             |
| 494440089 | metallo-beta-lactamase family protein                                    | 0.0231                     | 0.0242                     | -             |
| 494440093 | hypothetical protein                                                     | 0.0134                     | 0.0438                     | -             |
| 494440094 | hypothetical protein                                                     | 0.0087                     | 0.0127                     | -             |
| 494440108 | Gamma-glutamyltransferase                                                | 0.0119                     | 0.0677                     | -             |
| 494440168 | putative sodium/hexose cotransport protein                               | 0.0521                     | 0.0306                     | -             |
| 494440170 | Glycine hydroxymethyltransferase                                         | 0.0923                     | 0.0965                     | -             |
| 494440248 | DNA-directed RNA polymerase subunit beta'                                | 0.3469                     | 0.4348                     | -             |
| 494440251 | translation elongation factor G                                          | 0.1887                     | 0.3033                     | -             |
| 494440252 | conserved repeat domain protein                                          | 0.0099                     | 0.0119                     | -             |
| 494440261 | 30S ribosomal protein S3                                                 | 0.8761                     | 0.789                      | -             |
| 494440262 | 50S ribosomal protein L16                                                | 0.119                      | 0.2637                     | -             |
| 494440279 | DNA-directed RNA polymerase subunit alpha                                | 0.2874                     | 0.2363                     | -             |
| 494440293 | UDP-glucose pyrophosphorylase                                            | 0.0441                     | 0.0378                     | -             |
| 494440303 | acyl-CoA dehydrogenase-like protein                                      | 0.014                      | 0.0245                     | -             |
| 494440310 | Oar-like outer membrane protein protein, OmpA family                     | 0.1152                     | 0.1737                     | -             |
| 494440380 | hypothetical protein                                                     | 0.0192                     | 0.0263                     | -             |

|           |                                                                  |        |        |   |
|-----------|------------------------------------------------------------------|--------|--------|---|
| 494440393 | hypothetical protein                                             | 0.0438 | 0.0315 | - |
| 494440413 | transcriptional regulator, TetR family protein                   | 0.0024 | 0.0602 | - |
| 494440424 | pyruvate dehydrogenase subunit E1                                | 0.0704 | 0.0576 | - |
| 494440428 | acyl-CoA synthase                                                | 0.0223 | 0.0122 | - |
| 494440448 | TonB-dependent receptor                                          | 0.0157 | 0.0285 | - |
| 494440463 | putative esterase                                                | 0.0186 | 0.0196 | - |
| 494440471 | hypothetical protein                                             | 0.018  | 0.0638 | - |
| 494440472 | putative ferredoxin                                              | 0.0188 | 0.0437 | - |
| 494440474 | Transcriptional regulator                                        | 0.01   | 0.0349 | - |
| 494440489 | Cytochrome c-type biogenesis protein CcmF                        | 0.0328 | 0.0639 | - |
| 494440493 | chromosome segregation protein                                   | 0.0265 | 0.0298 | - |
| 494440496 | transcriptional regulatory protein                               | 0.0052 | 0.1165 | - |
| 494440501 | citrate synthase                                                 | 0.0363 | 0.1259 | - |
| 494440504 | succinate dehydrogenase flavoprotein subunit                     | 0.0666 | 0.0642 | - |
| 494440507 | dihydroliipoamide acetyltransferase                              | 0.1104 | 0.0719 | - |
| 494440511 | Succinyl-CoA synthetase, alpha subunit                           | 0.2277 | 0.4655 | - |
| 494440530 | Multi-sensor Hybrid Histidine Kinase                             | 0.015  | 0.078  | - |
| 494440535 | major facilitator family transporter                             | 0.0056 | 0.0393 | - |
| 494440566 | hypothetical protein                                             | 0.0734 | 0.0535 | - |
| 494440570 | thioredoxin reductase 1                                          | 0.0424 | 0.0755 | - |
| 494440586 | hypothetical protein                                             | 0.0009 | 0.0114 | - |
| 494440593 | acyl-CoA synthase                                                | 0.005  | 0.0122 | - |
| 494440606 | sodium/proton antiporter                                         | 0.0392 | 0.0437 | - |
| 494440623 | hypothetical protein                                             | 0.0515 | 0.0712 | - |
| 494440631 | long-chain-fatty-acid--CoA ligase                                | 0.0233 | 0.0405 | - |
| 494440650 | ATP-dependent protease ATP-binding subunit                       | 0.0694 | 0.1366 | - |
| 494440658 | 3-oxoacyl-(acyl carrier protein) synthase                        | 0.2047 | 0.0787 | - |
| 494440666 | DNA polymerase III delta prime subunit                           | 0.1052 | 0.0713 | - |
| 494440687 | sensor histidine kinase                                          | 0.0385 | 0.0522 | - |
| 494440715 | hypothetical protein                                             | 0.0057 | 0.0113 | - |
| 494440752 | probable choline transporter                                     | 0.0171 | 0.0163 | - |
| 494440761 | hypothetical protein                                             | 0.0208 | 0.0159 | - |
| 494440791 | periplasmic protein TonB                                         | 0.1021 | 0.1436 | - |
| 494440794 | Lipid A export ATP-binding/permease protein MsbA                 | 0.0925 | 0.1682 | - |
| 494440795 | TonB system biopolymer transport component                       | 0.2686 | 0.1925 | - |
| 494440796 | TonB system biopolymer transport component                       | 0.1305 | 0.104  | - |
| 494440804 | Ubiquinone biosynthesis hydroxylase, UbiH/UbiF/VisC/COQ6         | 0.0433 | 0.2344 | - |
| 494440806 | aminopeptidase P II                                              | 0.0154 | 0.034  | - |
| 494440814 | D-erythrose-4-phosphate dehydrogenase                            | 0.0336 | 0.1945 | - |
| 494440818 | TonB-dependent receptor                                          | 0.3984 | 0.2619 | - |
| 494440824 | S-adenosyl-L-homocysteine hydrolase                              | 0.0568 | 0.0634 | - |
| 494440844 | RNA polymerase sigma factor                                      | 0.2212 | 0.1325 | - |
| 494440852 | 50S ribosomal subunit protein L28                                | 0.1896 | 0.1055 | - |
| 494440860 | Exonuclease III                                                  | 0.0567 | 0.0245 | - |
| 494440886 | Sodium-transporting two-sector ATPase                            | 0.2831 | 0.2967 | - |
| 494440889 | F-type H+-transporting ATPase c chain                            | 0.7616 | 0.473  | - |
| 494440890 | F0F1 ATP synthase subunit A                                      | 0.532  | 0.282  | - |
| 494440893 | Putative ParA family protein                                     | 0.0523 | 0.0365 | - |
| 494440897 | putative inner membrane protein translocase component YidC       | 0.0155 | 0.0318 | - |
| 494440905 | DNA gyrase subunit B                                             | 0.0228 | 0.0485 | - |
| 494440908 | glycyl-tRNA synthetase subunit alpha                             | 0.0268 | 0.0819 | - |
| 494440911 | potassium uptake protein TrkH                                    | 0.013  | 0.0388 | - |
| 494440912 | potassium transporter peripheral membrane component              | 0.0147 | 0.0161 | - |
| 494440923 | cytochrome c oxidase, subunit II                                 | 0.3062 | 0.5784 | - |
| 494440924 | Cytochrome-c oxidase                                             | 0.2258 | 0.3464 | - |
| 494440926 | cytochrome c oxidase, subunit III                                | 0.1771 | 0.1709 | - |
| 494440936 | hypothetical protein                                             | 0.0655 | 0.1077 | - |
| 494440942 | N-acetylglutamate synthase                                       | 0.0159 | 0.0309 | - |
| 494440961 | TPR domain protein                                               | 0.003  | 0.0082 | - |
| 494441008 | flagellar biosynthesis protein                                   | 0.0519 | 0.4975 | - |
| 494441030 | transcription termination factor Rho                             | 0.065  | 0.135  | - |
| 494441060 | deoxyribodipyrimidine photolyase, putative                       | 0.0061 | 0.0078 | - |
| 494441063 | dihydroorotate dehydrogenase/oxidoreductase, FAD-binding protein | 0.0359 | 0.0457 | - |
| 494441066 | hypothetical protein                                             | 0.0395 | 0.1249 | - |
| 494441070 | hypothetical protein                                             | 0.0279 | 0.1783 | - |
| 494441078 | hypothetical protein                                             | 0.0308 | 0.0315 | - |
| 494441085 | hypothetical protein                                             | 0.0048 | 0.0105 | - |
| 494441138 | Amidohydrolase family protein                                    | 0.0118 | 0.024  | - |
| 494441144 | hypothetical protein                                             | 0.0238 | 0.029  | - |
| 494441145 | hypothetical protein                                             | 0.0718 | 0.0737 | - |
| 494441153 | TonB-dependent receptor                                          | 0.0857 | 0.0749 | - |
| 494441188 | hypothetical protein                                             | 0.0087 | 0.0084 | - |
| 494441189 | methionine synthase I                                            | 0.0068 | 0.0271 | - |
| 494441191 | methionine synthase I                                            | 0.0362 | 0.033  | - |
| 494441216 | hypothetical protein                                             | 0.0056 | 0.0074 | - |
| 494441219 | alcohol dehydrogenase, zinc-containing                           | 0.0086 | 0.0352 | - |
| 494441226 | Alcohol dehydrogenase, class IV                                  | 0.0146 | 0.0246 | - |
| 494441251 | Alcohol dehydrogenase large subunit                              | 0.0217 | 0.0307 | - |
| 494441260 | hypothetical protein                                             | 0.0078 | 0.0042 | - |
| 494441261 | TPR domain protein                                               | 0.0092 | 0.027  | - |
| 494441262 | TonB-dependent receptor                                          | 0.0848 | 0.1119 | - |
| 494441265 | hypothetical protein                                             | 0.0075 | 0.0146 | - |
| 494441274 | MFS permease                                                     | 0.0568 | 0.0609 | - |
| 494441287 | UvrD/REP helicase                                                | 0.0023 | 0.0154 | - |
| 494441290 | rarD protein                                                     | 0.0376 | 0.0725 | - |
| 494441312 | GTP-binding protein LepA                                         | 0.1105 | 0.0709 | - |
| 494441339 | hypothetical protein                                             | 0.0087 | 0.0076 | - |
| 494441389 | aminomethyl transferase family protein                           | 0.0067 | 0.009  | - |
| 494441408 | phosphoenolpyruvate carboxylase                                  | 0.032  | 0.0151 | - |
| 494441412 | glucose-6-phosphate 1-dehydrogenase                              | 0.0846 | 0.1687 | - |
| 494441414 | glucokinase                                                      | 0.1339 | 0.099  | - |
| 494441439 | Photosynthetic reaction center H-chain                           | 0.0038 | 0.0152 | - |
| 494441544 | Secretion protein HlyD                                           | 0.1055 | 0.1084 | - |
| 494441560 | Bacterioferritin                                                 | 0.0098 | 0.0364 | - |

|           |                                                                                                          |        |         |   |
|-----------|----------------------------------------------------------------------------------------------------------|--------|---------|---|
| 494441567 | putative rod shape-determining protein RodA                                                              | 1.782  | 19.8767 | - |
| 494441570 | D-alanyl-D-alanine carboxypeptidase                                                                      | 0.0139 | 0.0172  | - |
| 494441573 | peptide chain release factor RF-3                                                                        | 0.0454 | 0.1303  | - |
| 494441576 | glutamine synthetase, putative                                                                           | 0.0791 | 0.1553  | - |
| 494441607 | Kynureninase                                                                                             | 0.0098 | 0.0272  | - |
| 494441621 | Cysteine synthase                                                                                        | 0.0435 | 0.0438  | - |
| 494441638 | Acyl-CoA hydrolase-like protein                                                                          | 0.0412 | 0.0734  | - |
| 494441639 | short chain dehydrogenase                                                                                | 0.0617 | 0.0457  | - |
| 494441640 | acetyl-coenzyme A synthetase                                                                             | 0.0202 | 0.0294  | - |
| 494441641 | Putative cyclase                                                                                         | 0.0108 | 0.0321  | - |
| 494441642 | taurine dioxygenase                                                                                      | 0.0231 | 0.0597  | - |
| 494441643 | sodium/alanine symporter                                                                                 | 0.0176 | 0.037   | - |
| 494441646 | Catalase                                                                                                 | 0.1254 | 1.049   | - |
| 494441659 | alcohol dehydrogenase, iron-containing                                                                   | 0.0574 | 0.15    | - |
| 494441669 | ATP-dependent metalloprotease FtsH                                                                       | 0.093  | 0.1107  | - |
| 494441685 | SmpB protein                                                                                             | 0.1181 | 0.1418  | - |
| 494441688 | 30S ribosomal protein S15                                                                                | 0.5528 | 0.3424  | - |
| 494441696 | DNA polymerase III, epsilon subunit                                                                      | 0.0101 | 0.0903  | - |
| 494441708 | putative integral membrane protein                                                                       | 0.0196 | 0.0594  | - |
| 494441716 | monooxygenase, flavin-binding family protein                                                             | 0.0261 | 0.026   | - |
| 494441730 | leucyl-tRNA synthetase                                                                                   | 0.0112 | 0.0958  | - |
| 494441756 | LuxO repressor protein                                                                                   | 0.0318 | 0.0139  | - |
| 494441824 | amidophosphoribosyltransferase                                                                           | 0.0578 | 0.0436  | - |
| 494441830 | tryptophan synthase subunit beta                                                                         | 0.0541 | 0.0673  | - |
| 494441856 | acetoin dehydrogenase complex, E1 component, alpha subunit                                               | 0.0137 | 0.0467  | - |
| 494441870 | cytochrome P450                                                                                          | 0.0119 | 0.021   | - |
| 494441872 | glutathione-dependent formaldehyde-activating, GFA                                                       | 0.0103 | 0.0211  | - |
| 494441898 | putative PQQ-dependent polyvinyl alcohol dehydrogenase precursor                                         | 0.0096 | 0.0228  | - |
| 494441911 | putative TonB-dependent receptor                                                                         | 0.0347 | 0.039   | - |
| 494441918 | cyclohexanone monooxygenase                                                                              | 0.0098 | 0.0144  | - |
| 494441942 | hypothetical protein                                                                                     | 0.0146 | 0.1202  | - |
| 494441945 | putative integral membrane transport protein                                                             | 0.006  | 0.018   | - |
| 494441946 | cytochrome P450 family protein                                                                           | 0.0134 | 0.0541  | - |
| 494441963 | Phosphoesterase, PA-phosphatase related protein                                                          | 0.036  | 0.0475  | - |
| 494441970 | probable oxidoreductase                                                                                  | 0.015  | 0.0179  | - |
| 494441971 | hypothetical protein                                                                                     | 1.1194 | 5.6645  | - |
| 494441999 | arylsulfatase B precursor                                                                                | 0.0065 | 0.0041  | - |
| 494442009 | hypothetical protein                                                                                     | 0.0257 | 0.0325  | - |
| 494442010 | hypothetical protein                                                                                     | 0.0212 | 0.0482  | - |
| 494442013 | putative beta-ketoacyl synthase                                                                          | 0.0488 | 0.1003  | - |
| 494442054 | N-acyl-D-glutamate amidohydrolase                                                                        | 0.0175 | 0.0232  | - |
| 494442059 | formate dehydrogenase alpha subunit                                                                      | 0.034  | 0.0245  | - |
| 494442061 | sarcosine dehydrogenase                                                                                  | 0.0372 | 0.0307  | - |
| 494442071 | hypothetical protein                                                                                     | 0.0658 | 0.0237  | - |
| 494442074 | hypothetical protein                                                                                     | 0.0331 | 0.0825  | - |
| 494442088 | putative saccharopine dehydrogenase                                                                      | 0.02   | 0.0175  | - |
| 494442089 | 4-aminobutyrate aminotransferase                                                                         | 0.0074 | 0.0163  | - |
| 494442093 | YfmJ                                                                                                     | 0.0127 | 0.0845  | - |
| 494442097 | hypothetical protein                                                                                     | 0.0159 | 0.037   | - |
| 494442101 | sarcosine oxidase, alpha subunit family protein                                                          | 0.0064 | 0.0166  | - |
| 494442106 | hypothetical protein                                                                                     | 0.014  | 0.0373  | - |
| 494442110 | TonB-dependent receptor                                                                                  | 0.0685 | 0.041   | - |
| 494442112 | TonB-dependent receptor                                                                                  | 0.0139 | 0.0334  | - |
| 494442122 | Acyl-CoA synthetases (AMP-forming)/AMP-acid ligases II                                                   | 0.0046 | 0.0223  | - |
| 494442149 | RND family efflux transporter                                                                            | 0.0759 | 0.0433  | - |
| 494442150 | proton/peptide symporter family protein                                                                  | 0.0076 | 0.0192  | - |
| 494442171 | hypothetical protein                                                                                     | 0.0122 | 0.0222  | - |
| 494442186 | ammonium transporter                                                                                     | 0.0878 | 0.1078  | - |
| 494442198 | sulfatase family protein                                                                                 | 0.0231 | 0.0744  | - |
| 494442226 | Xaa-Pro aminopeptidase family enzyme                                                                     | 0.0296 | 0.2694  | - |
| 494442232 | probable long chain fatty acid CoA ligase                                                                | 0.0211 | 0.0389  | - |
| 494442260 | hypothetical protein                                                                                     | 0.0416 | 0.0326  | - |
| 494442261 | hypothetical protein                                                                                     | 0.0134 | 0.0231  | - |
| 494442286 | Spermidine/putrescine ABC transporter ATP-binding subunit                                                | 0.0482 | 0.0883  | - |
| 494442290 | hypothetical protein                                                                                     | 0.0093 | 0.0391  | - |
| 494442300 | tRNA nucleotidyltransferase, putative                                                                    | 0.0158 | 0.1236  | - |
| 494442308 | Parvulin-like peptidyl-prolyl isomerase                                                                  | 0.048  | 0.035   | - |
| 494442354 | transcriptional regulator                                                                                | 0.0277 | 0.0128  | - |
| 494442371 | DNA gyrase subunit A                                                                                     | 0.0584 | 0.1392  | - |
| 494442407 | Helix-turn-helix, AraC type                                                                              | 0.025  | 0.0473  | - |
| 494442433 | translocase                                                                                              | 0.0181 | 0.0315  | - |
| 494442444 | UDP-N-acetylmuramoyl-L-alanyl-D-glutamate synthetase                                                     | 0.0428 | 0.1319  | - |
| 494442459 | ubiquinol-cytochrome c reductase, cytochrome b                                                           | 0.1952 | 0.1547  | - |
| 494442464 | hypothetical protein                                                                                     | 0.1431 | 0.0486  | - |
| 494442489 | Twin-arginine translocation protein TatB                                                                 | 0.0376 | 0.0476  | - |
| 494442491 | Glutamyl-tRNA(Gln) amidotransferase A subunit                                                            | 0.0157 | 0.0823  | - |
| 494442502 | hypothetical protein                                                                                     | 0.0068 | 0.0106  | - |
| 494442516 | possible NADH oxidoreductase                                                                             | 0.0169 | 0.2043  | - |
| 494442528 | cAMP-binding protein - catabolite gene activator and regulatory subunit of cAMP-dependent protein kinase | 0.0646 | 0.0358  | - |
| 494442529 | adenylate cyclase PLUS two component hybrid sensor and regulator                                         | 0.0237 | 0.0927  | - |
| 494442590 | phenylalanyl-tRNA synthetase alpha subunit                                                               | 0.1198 | 0.1435  | - |
| 494442595 | hypothetical protein                                                                                     | 0.0101 | 0.0196  | - |
| 494442636 | hypothetical protein                                                                                     | 0.0035 | 0.0204  | - |
| 494442668 | oligopeptide ABC transporter periplasmic oligopeptide-binding protein                                    | 0.0068 | 0.0067  | - |
| 494442669 | Phosphoglycerate mutase 1                                                                                | 0.0216 | 0.069   | - |
| 494442674 | alkaline phosphatase, putative                                                                           | 0.0047 | 0.0571  | - |
| 494442704 | isocitrate lyase                                                                                         | 0.2878 | 0.2803  | - |
| 494442711 | hypothetical protein                                                                                     | 0.0803 | 0.057   | - |
| 494442714 | chaperone protein HscA                                                                                   | 0.0814 | 0.0533  | - |
| 494442718 | cysteine desulfurase                                                                                     | 0.1292 | 0.1793  | - |
| 494442724 | phosphoribosylformylglycinamide synthase                                                                 | 0.0272 | 0.0534  | - |
| 494442728 | Alpha-methylacyl-CoA racemase                                                                            | 0.0051 | 0.0132  | - |
| 494442740 | protein kinase C inhibitor                                                                               | 0.0299 | 0.0429  | - |



|           |                                                                                                 |        |        |   |
|-----------|-------------------------------------------------------------------------------------------------|--------|--------|---|
| 494442749 | probable phosphate transporter                                                                  | 0.0895 | 0.1058 | - |
| 494442750 | hypothetical protein                                                                            | 0.0537 | 0.0954 | - |
| 494442752 | Phosphate-selective porin O and P                                                               | 0.0214 | 0.0179 | - |
| 494442788 | hypothetical protein                                                                            | 0.1741 | 0.1196 | - |
| 494442799 | efflux transporter, RND family, MFP subunit                                                     | 0.0287 | 0.0367 | - |
| 494442816 | Glutamate--ammonia ligase                                                                       | 0.0225 | 0.0373 | - |
| 494442821 | DNA topoisomerase IV subunit A                                                                  | 0.0177 | 0.0497 | - |
| 494442824 | translation elongation factor P                                                                 | 0.0446 | 0.0304 | - |
| 494442832 | anti-sigm factor, ChrR                                                                          | 0.1323 | 0.1085 | - |
| 494442836 | ABC transporter, ATP-binding/permease protein                                                   | 0.0141 | 0.0565 | - |
| 494442883 | L-threonine 3-dehydrogenase                                                                     | 0.035  | 0.0499 | - |
| 494442897 | NAD synthase                                                                                    | 0.024  | 0.0391 | - |
| 494442898 | competence protein ComL                                                                         | 0.0226 | 0.0328 | - |
| 494442913 | diguanylate cyclase/phosphodiesterase (GGDEF & EAL domains)                                     | 0.0769 | 0.0773 | - |
| 494442917 | phosphatidylserine synthase                                                                     | 0.0519 | 0.0218 | - |
| 494442952 | Bacterioferritin                                                                                | 0.0563 | 0.0845 | - |
| 494442984 | uridylyate kinase                                                                               | 0.0854 | 0.0876 | - |
| 494442985 | ribosome recycling factor                                                                       | 0.1446 | 0.0755 | - |
| 494442990 | probable outer membrane protein                                                                 | 0.065  | 0.0418 | - |
| 494442991 | hypothetical protein                                                                            | 0.1416 | 0.4198 | - |
| 494443006 | putative citrate lyase beta subunit                                                             | 0.0161 | 0.0259 | - |
| 494443007 | MmgE/PrpD                                                                                       | 0.0079 | 0.0149 | - |
| 494443008 | 4-hydroxyphenylacetate 3-hydroxylase family protein                                             | 0.0067 | 0.0075 | - |
| 494443013 | 3-oxoadipate enol-lactone hydrolase                                                             | 0.0136 | 0.0239 | - |
| 494443016 | 5-oxoprolinase (ATP-hydrolyzing)                                                                | 0.0121 | 0.0242 | - |
| 494443026 | Methenyltetrahydrofolate cyclohydrolase                                                         | 0.0204 | 0.0501 | - |
| 494443027 | major facilitator superfamily MFS_1                                                             | 0.0117 | 0.089  | - |
| 494443062 | hypothetical protein                                                                            | 0.0146 | 0.0464 | - |
| 494443085 | lipid A export ATP-binding/permease protein Msba                                                | 0.0257 | 0.027  | - |
| 494443087 | MotA/TolQ/ExbB proton channel                                                                   | 0.0238 | 0.0747 | - |
| 494443098 | hypothetical protein                                                                            | 0.0576 | 0.0315 | - |
| 494443100 | Bacterial ring hydroxylating dioxygenase, alpha subunit:Immunoglobulin/major histocompatibility | 0.0092 | 0.0267 | - |
| 494443101 | aminomethyltransferase                                                                          | 0.0242 | 0.0353 | - |
| 494443103 | phytoene dehydrogenase                                                                          | 0.0114 | 0.0117 | - |
| 494443108 | hypothetical protein                                                                            | 0.0018 | 0.0256 | - |
| 494443110 | hypothetical protein                                                                            | 0.0134 | 0.058  | - |
| 494443111 | TonB-dependent receptor                                                                         | 0.0535 | 0.0596 | - |
| 494443119 | hypothetical protein                                                                            | 0.0084 | 0.0233 | - |
| 494443150 | hypothetical protein                                                                            | 0.0103 | 0.0105 | - |
| 494443158 | sulfatase family protein                                                                        | 0.0275 | 0.106  | - |
| 494443166 | Na(+)-translocating NADH-quinone reductase subunit B                                            | 0.1354 | 0.1162 | - |
| 494443168 | glyceraldehyde-3-phosphate dehydrogenase                                                        | 0.0498 | 0.0284 | - |
| 494443175 | DNA topoisomerase I                                                                             | 0.0153 | 0.0309 | - |
| 494443180 | hypothetical protein                                                                            | 0.0355 | 0.2272 | - |
| 494443181 | hypothetical protein                                                                            | 0.0316 | 0.227  | - |
| 494443188 | hypothetical protein                                                                            | 0.0192 | 0.5064 | - |
| 494443204 | hypothetical protein                                                                            | 0.0397 | 0.0468 | - |
| 494443205 | Isoleucyl-tRNA synthetase, class Ia                                                             | 0.034  | 0.037  | - |
